# Supplementary material for: Integrated network pharmacology and molecular docking approaches to reveal the synergistic mechanism of multiple components in Venenum Bufonis for ameliorating heart failure
Source: PeerJ journal article supplement (doi:10.7717/peerj.10107), 2020-10-30

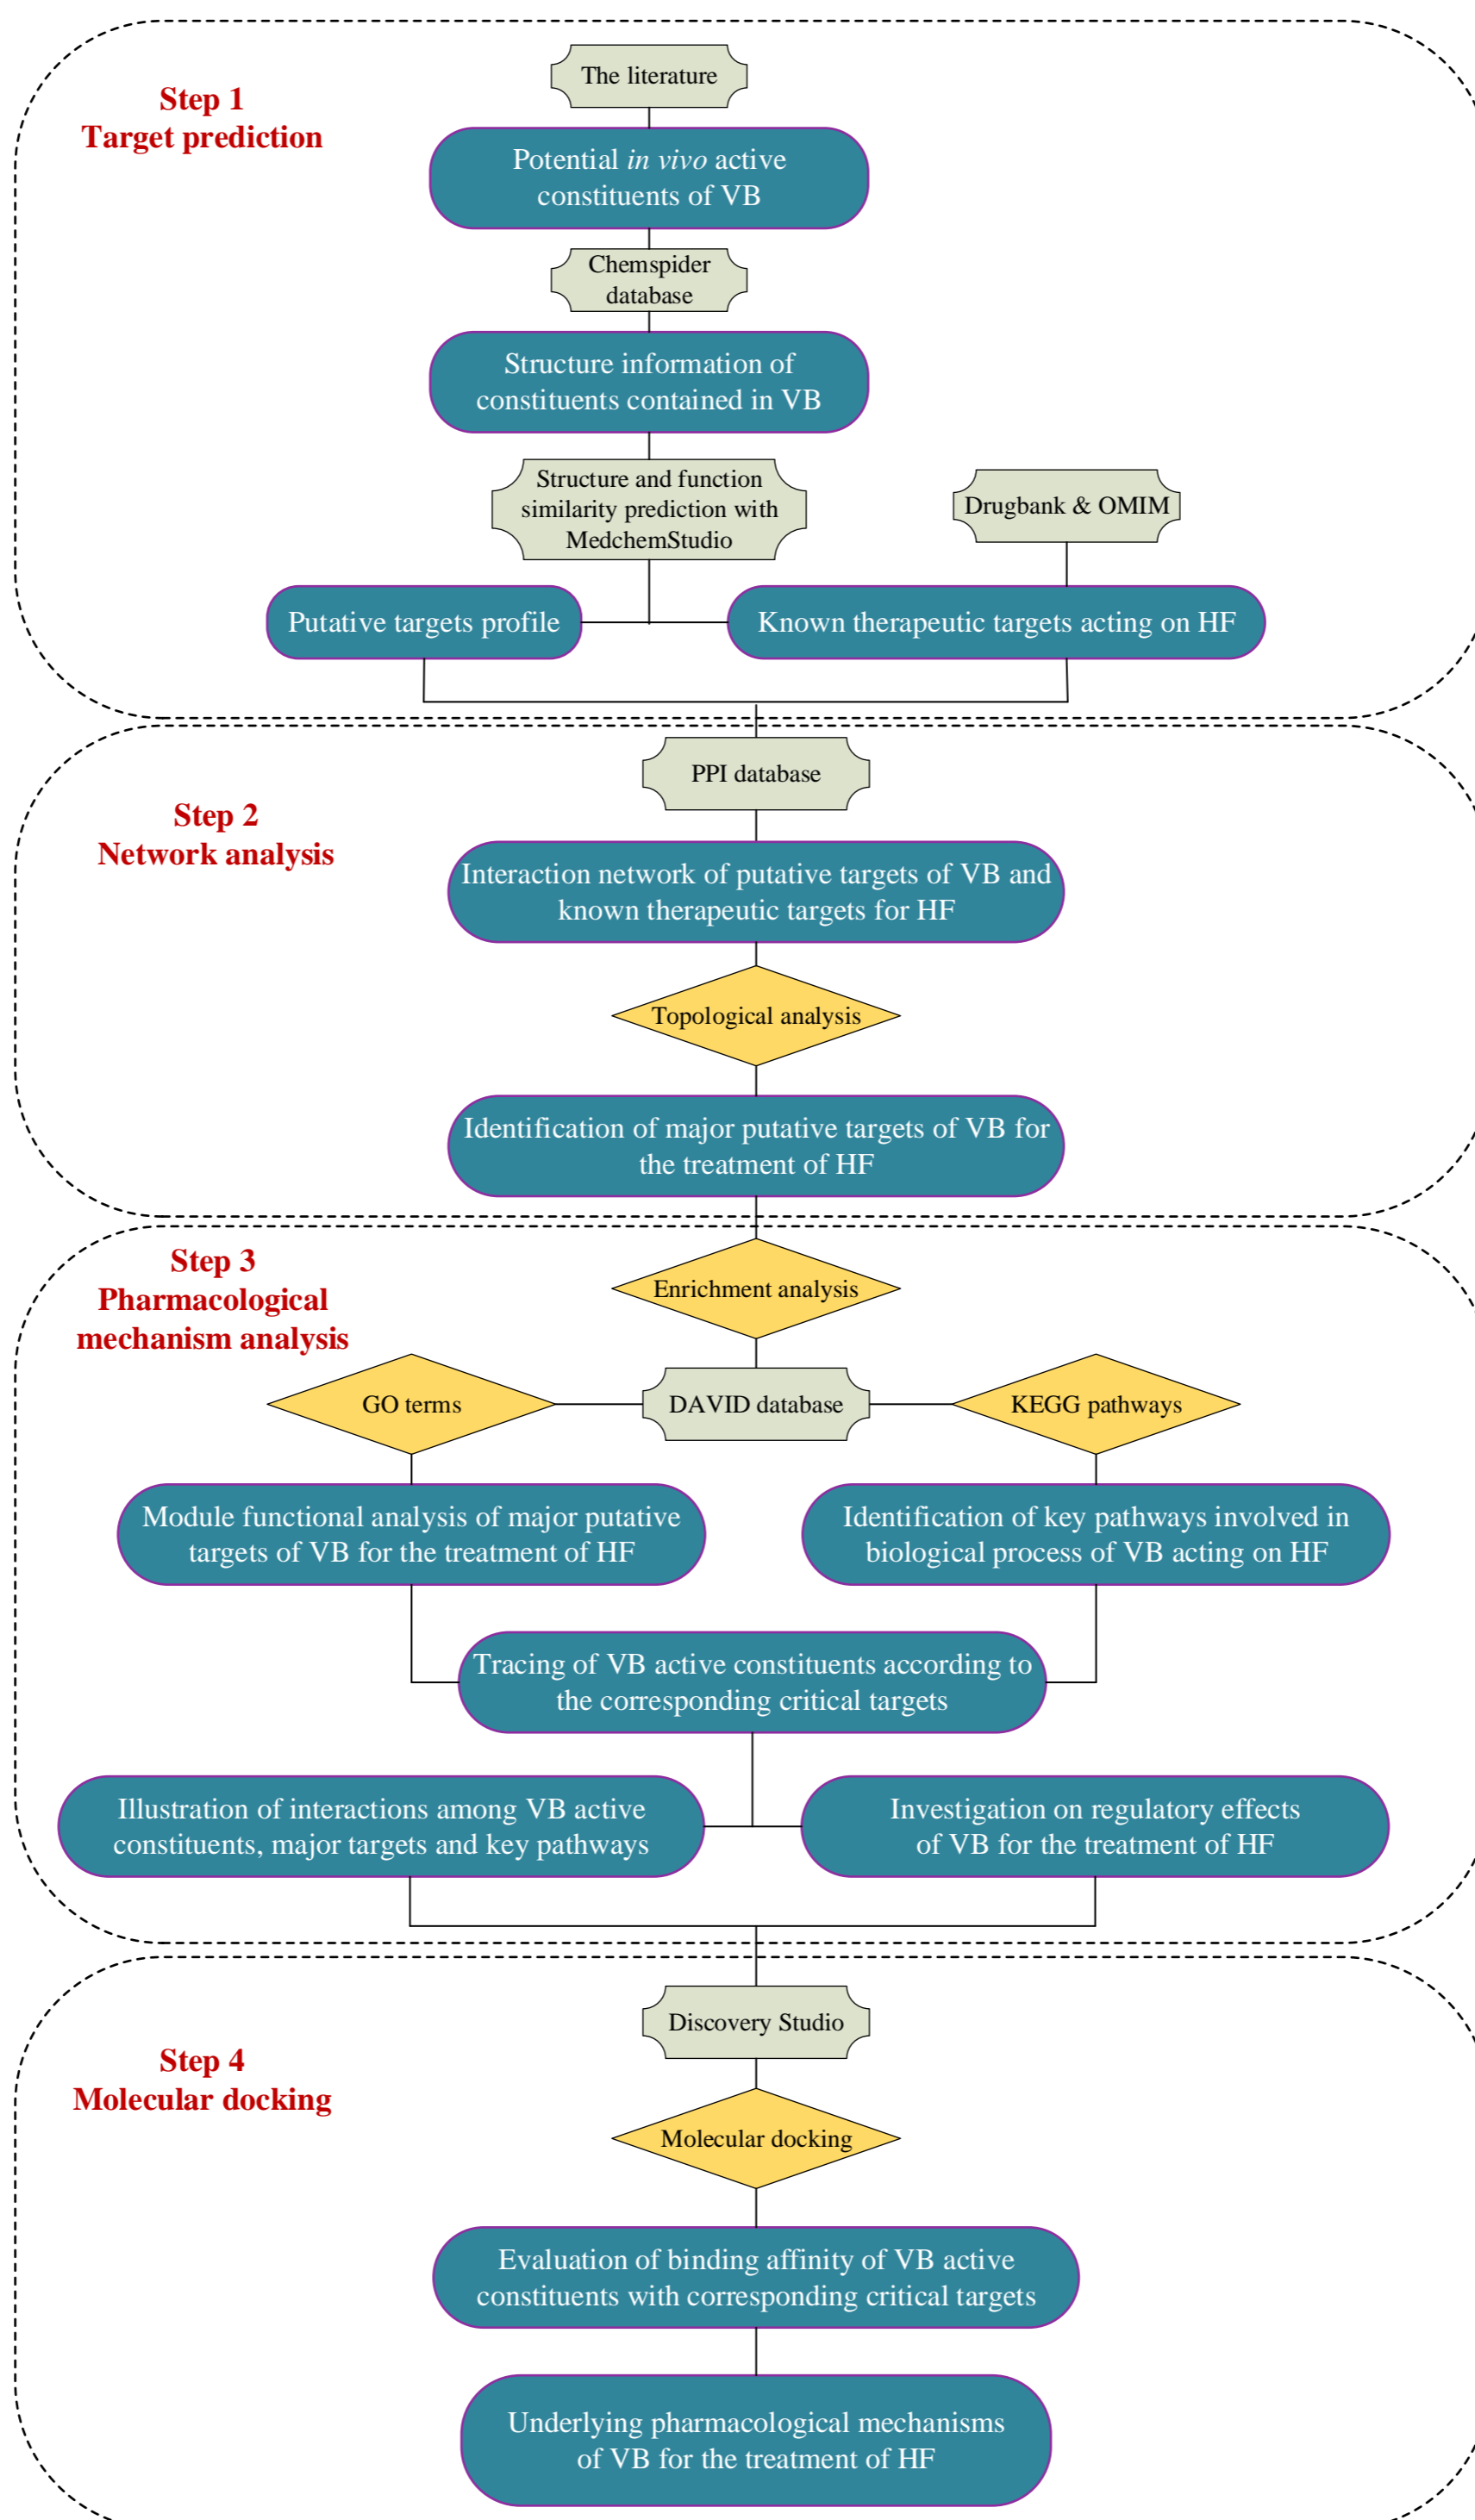

Supplement: Fig._S1.pdf [file Fig._S1.pdf]
