# Supplementary material for: Integrated network pharmacology and molecular docking approaches to reveal the synergistic mechanism of multiple components in Venenum Bufonis for ameliorating heart failure
Source: PeerJ. 2020 Oct 30;8:e10107. doi: 10.7717/peerj.10107 (PMC7605218; doi:10.7717/peerj.10107)
Supplement: Supplemental Information 2 [file peerj-08-10107-s002.xlsx]

## Sheet: Sheet1
Title: Integrated network pharmacology and molecular docking approaches to reveal the synergistic mechanism of multiple components in Venenum Bufonis for ameliorating heart failure Authors: Guohua Yu et al.
Table S2	Potential targets of In vivo ingredients of VB
ID	In vivo ingredients of VB	Similarscore	Drugbank_ID	Target_name	Target_Uniprotacc	Target_Uniprotid	Genesymbol		VB targets after removing the redundants
M1	3-Oxo-resibufogenin	0.6458	DB00421	Voltage-dependent L-type calcium channel subunit beta-4	O00305	CACB4_HUMAN	CACNB4		SULT2B1
M1	3-Oxo-resibufogenin	0.6458	DB00421	Voltage-dependent P/Q-type calcium channel subunit alpha-1A	O00555	CAC1A_HUMAN	CACNA1A		CACNB4
M1	3-Oxo-resibufogenin	0.625	DB02859	Acetyl-CoA carboxylase 2	O00763	ACACB_HUMAN	ACACB		CACNA1A
M1	3-Oxo-resibufogenin	0.6458	DB00421	Voltage-dependent T-type calcium channel subunit alpha-1G	O43497	CAC1G_HUMAN	CACNA1G		GABRP
M1	3-Oxo-resibufogenin	0.6458	DB00421	Voltage-dependent L-type calcium channel subunit alpha-1F	O60840	CAC1F_HUMAN	CACNA1F		ACACB
M1	3-Oxo-resibufogenin	0.6444	DB00163	Nuclear receptor subfamily 1 group I member 2	O75469	NR1I2_HUMAN	NR1I2		SDHD
M1	3-Oxo-resibufogenin	0.6444	DB00163	SEC14-like protein 2	O76054	S14L2_HUMAN	SEC14L2		GAPDHS
M1	3-Oxo-resibufogenin	0.6458	DB00421	Voltage-dependent T-type calcium channel subunit alpha-1H	O95180	CAC1H_HUMAN	CACNA1H		CHD1
M1	3-Oxo-resibufogenin	0.6304	DB02659	Alcohol dehydrogenase 1C	P00326	ADH1G_HUMAN	ADH1C		GABRD
M1	3-Oxo-resibufogenin	0.6304	DB02659	Cytochrome c oxidase subunit 1	P00395	COX1_HUMAN	MT-CO1		UQCRQ
M1	3-Oxo-resibufogenin	0.6304	DB02659	Cytochrome c oxidase subunit 2	P00403	COX2_HUMAN	MT-CO2		GRIN2D
M1	3-Oxo-resibufogenin	0.6304	DB02659	Cytochrome c oxidase subunit 3	P00414	COX3_HUMAN	MT-CO3		CYP27B1
M1	3-Oxo-resibufogenin	0.6667	DB07375	Ig kappa chain C region	P01834	IGKC_HUMAN	IGKC		CACNA1G
M1	3-Oxo-resibufogenin	0.6667	DB07375	Ig gamma-1 chain C region	P01857	IGHG1_HUMAN	IGHG1		GRIN3B
M1	3-Oxo-resibufogenin	0.6667	DB07375	Ig gamma-2 chain C region	P01859	IGHG2_HUMAN	IGHG2		ACSL4
M1	3-Oxo-resibufogenin	0.6667	DB08510	Ig gamma-2 chain C region	P01859	IGHG2_HUMAN	IGHG2		CACNA1F
M1	3-Oxo-resibufogenin	0.6122	DB08547	Ig gamma-2 chain C region	P01859	IGHG2_HUMAN	IGHG2		TRIM13
M1	3-Oxo-resibufogenin	0.6047	DB02854	Ig gamma-2 chain C region	P01859	IGHG2_HUMAN	IGHG2		GLRA3
M1	3-Oxo-resibufogenin	0.6522	DB00603	Estrogen receptor	P03372	ESR1_HUMAN	ESR1		NR1I2
M1	3-Oxo-resibufogenin	0.6522	DB00823	Estrogen receptor	P03372	ESR1_HUMAN	ESR1		SOAT2
M1	3-Oxo-resibufogenin	0.6429	DB00655	Estrogen receptor	P03372	ESR1_HUMAN	ESR1		SEC14L2
M1	3-Oxo-resibufogenin	0.6	DB06871	Estrogen receptor	P03372	ESR1_HUMAN	ESR1		STK17B
M1	3-Oxo-resibufogenin	0.6154	DB00641	3-hydroxy-3-methylglutaryl-coenzyme A reductase	P04035	HMDH_HUMAN	HMGCR		CACNA1H
M1	3-Oxo-resibufogenin	0.6304	DB02659	Phospholipase A2	P04054	PA21B_HUMAN	PLA2G1B		ADCY5
M1	3-Oxo-resibufogenin	0.6522	DB00351	Glucocorticoid receptor	P04150	GCR_HUMAN	NR3C1		MT-CYB
M1	3-Oxo-resibufogenin	0.6458	DB00421	Glucocorticoid receptor	P04150	GCR_HUMAN	NR3C1		ADH1C
M1	3-Oxo-resibufogenin	0.6182	DB01410	Glucocorticoid receptor	P04150	GCR_HUMAN	NR3C1		GSR
M1	3-Oxo-resibufogenin	0.6458	DB00421	Sex hormone-binding globulin	P04278	SHBG_HUMAN	SHBG		MT-CO1
M1	3-Oxo-resibufogenin	0.6481	DB00511	Sodium/potassium-transporting ATPase subunit alpha-1	P05023	AT1A1_HUMAN	ATP1A1		MT-CO2
M1	3-Oxo-resibufogenin	0.6182	DB01396	Sodium/potassium-transporting ATPase subunit alpha-1	P05023	AT1A1_HUMAN	ATP1A1		MT-CO3
M1	3-Oxo-resibufogenin	0.6071	DB00390	Sodium/potassium-transporting ATPase subunit alpha-1	P05023	AT1A1_HUMAN	ATP1A1		PLAT
M1	3-Oxo-resibufogenin	0.6154	DB00641	Integrin beta-2	P05107	ITB2_HUMAN	ITGB2		CA2
M1	3-Oxo-resibufogenin	0.6444	DB00163	Protein kinase C beta type	P05771	KPCB_HUMAN	PRKCB		SERPINA1
M1	3-Oxo-resibufogenin	0.6889	DB01395	Progesterone receptor	P06401	PRGR_HUMAN	PGR		POMC
M1	3-Oxo-resibufogenin	0.6522	DB00603	Progesterone receptor	P06401	PRGR_HUMAN	PGR		IL1B
M1	3-Oxo-resibufogenin	0.6522	DB00823	Progesterone receptor	P06401	PRGR_HUMAN	PGR		IGKC
M1	3-Oxo-resibufogenin	0.6522	DB00351	Progesterone receptor	P06401	PRGR_HUMAN	PGR		IGHG1
M1	3-Oxo-resibufogenin	0.6458	DB00421	Progesterone receptor	P06401	PRGR_HUMAN	PGR		IGHG2
M1	3-Oxo-resibufogenin	0.7083	DB00700	Mineralocorticoid receptor	P08235	MCR_HUMAN	NR3C2		APCS
M1	3-Oxo-resibufogenin	0.6889	DB01395	Mineralocorticoid receptor	P08235	MCR_HUMAN	NR3C2		ORM1
M1	3-Oxo-resibufogenin	0.6458	DB00421	Mineralocorticoid receptor	P08235	MCR_HUMAN	NR3C2		ESR1
M1	3-Oxo-resibufogenin	0.6	DB01134	Mineralocorticoid receptor	P08235	MCR_HUMAN	NR3C2		HMGCR
M1	3-Oxo-resibufogenin	0.6364	DB03758	Heat shock protein HSP 90-beta	P08238	HS90B_HUMAN	HSP90AB1		PLA2G1B
M1	3-Oxo-resibufogenin	0.6304	DB02659	Cytochrome c oxidase subunit 6C	P09669	COX6C_HUMAN	COX6C		ANXA1
M1	3-Oxo-resibufogenin	0.6444	DB00163	Arachidonate 5-lipoxygenase	P09917	LOX5_HUMAN	ALOX5		NR3C1
M1	3-Oxo-resibufogenin	0.6304	DB02659	Cytochrome c oxidase subunit 8A, mitochondrial	P10176	COX8A_HUMAN	COX8A		SHBG
M1	3-Oxo-resibufogenin	0.6889	DB01395	Androgen receptor	P10275	ANDR_HUMAN	AR		TUBB4A
M1	3-Oxo-resibufogenin	0.6739	DB00621	Androgen receptor	P10275	ANDR_HUMAN	AR		CYP1A1
M1	3-Oxo-resibufogenin	0.6458	DB00421	Androgen receptor	P10275	ANDR_HUMAN	AR		ATP1A1
M1	3-Oxo-resibufogenin	0.6444	DB00984	Androgen receptor	P10275	ANDR_HUMAN	AR		ALDH2
M1	3-Oxo-resibufogenin	0.6304	DB08804	Androgen receptor	P10275	ANDR_HUMAN	AR		CYP17A1
M1	3-Oxo-resibufogenin	0.617	DB01420	Androgen receptor	P10275	ANDR_HUMAN	AR		ITGB2
M1	3-Oxo-resibufogenin	0.6078	DB04839	Androgen receptor	P10275	ANDR_HUMAN	AR		SERPINE1
M1	3-Oxo-resibufogenin	0.6047	DB02901	Androgen receptor	P10275	ANDR_HUMAN	AR		FGF1
M1	3-Oxo-resibufogenin	0.6364	DB03758	Dihydrolipoyllysine-residue acetyltransferase component of pyruvate dehydrogenase complex, mitochondrial	P10515	ODP2_HUMAN	DLAT		PRKCB
M1	3-Oxo-resibufogenin	0.6304	DB02659	Cytochrome c oxidase subunit 5B, mitochondrial	P10606	COX5B_HUMAN	COX5B		PGR
M1	3-Oxo-resibufogenin	0.6977	DB00894	Aromatase	P11511	CP19A_HUMAN	CYP19A1		ATP5B
M1	3-Oxo-resibufogenin	0.6304	DB02659	Cytochrome c oxidase subunit 4 isoform 1, mitochondrial	P13073	COX41_HUMAN	COX4I1		LPL
M1	3-Oxo-resibufogenin	0.6047	DB01536	3 beta-hydroxysteroid dehydrogenase/Delta 5-->4-isomerase type 1	P14060	3BHS1_HUMAN	HSD3B1		TUBB
M1	3-Oxo-resibufogenin	0.6667	DB01561	Estradiol 17-beta-dehydrogenase 1	P14061	DHB1_HUMAN	HSD17B1		PFN1
M1	3-Oxo-resibufogenin	0.6047	DB02901	Estradiol 17-beta-dehydrogenase 1	P14061	DHB1_HUMAN	HSD17B1		UQCRH
M1	3-Oxo-resibufogenin	0.6047	DB01536	Estradiol 17-beta-dehydrogenase 1	P14061	DHB1_HUMAN	HSD17B1		RHO
M1	3-Oxo-resibufogenin	0.6364	DB03758	Endoplasmin	P14625	ENPL_HUMAN	HSP90B1		NR3C2
M1	3-Oxo-resibufogenin	0.6304	DB02659	Cytochrome c oxidase subunit 6B1	P14854	CX6B1_HUMAN	COX6B1		HSP90AB1
M1	3-Oxo-resibufogenin	0.6304	DB02659	Cytochrome c oxidase subunit 7C, mitochondrial	P15954	COX7C_HUMAN	COX7C		MME
M1	3-Oxo-resibufogenin	0.6444	DB00163	Protein kinase C alpha type	P17252	KPCA_HUMAN	PRKCA		CYC1
M1	3-Oxo-resibufogenin	0.6458	DB00421	3-oxo-5-alpha-steroid 4-dehydrogenase 1	P18405	S5A1_HUMAN	SRD5A1		FGF4
M1	3-Oxo-resibufogenin	0.6458	DB00421	Cytochrome P450 11B2, mitochondrial	P19099	C11B2_HUMAN	CYP11B2		HCK
M1	3-Oxo-resibufogenin	0.65	DB07557	Retinoic acid receptor RXR-alpha	P19793	RXRA_HUMAN	RXRA		ANXA5
M1	3-Oxo-resibufogenin	0.6304	DB02659	Cytochrome c oxidase subunit 5A, mitochondrial	P20674	COX5A_HUMAN	COX5A		FGF2
M1	3-Oxo-resibufogenin	0.6383	DB00486	Cannabinoid receptor 1	P21554	CNR1_HUMAN	CNR1		COX6C
M1	3-Oxo-resibufogenin	0.6304	DB02659	Ferrochelatase, mitochondrial	P22830	HEMH_HUMAN	FECH		ALOX5
M1	3-Oxo-resibufogenin	0.6304	DB02659	Liver carboxylesterase 1	P23141	EST1_HUMAN	CES1		COX8A
M1	3-Oxo-resibufogenin	0.6444	DB00163	Diacylglycerol kinase alpha	P23743	DGKA_HUMAN	DGKA		AR
M1	3-Oxo-resibufogenin	0.6304	DB02659	Cytochrome c oxidase subunit 7A1, mitochondrial	P24310	CX7A1_HUMAN	COX7A1		DLAT
M1	3-Oxo-resibufogenin	0.6304	DB02659	Cytochrome c oxidase subunit 7B, mitochondrial	P24311	COX7B_HUMAN	COX7B		COX5B
M1	3-Oxo-resibufogenin	0.6481	DB08059	Phosphatidylinositol 3-kinase regulatory subunit alpha	P27986	P85A_HUMAN	PIK3R1		CYP2C8
M1	3-Oxo-resibufogenin	0.6458	DB00421	3-oxo-5-alpha-steroid 4-dehydrogenase 2	P31213	S5A2_HUMAN	SRD5A2		PIM1
M1	3-Oxo-resibufogenin	0.6383	DB00486	Cannabinoid receptor 2	P34972	CNR2_HUMAN	CNR2		TOP2A
M1	3-Oxo-resibufogenin	0.66	DB07700	Aldo-keto reductase family 1 member C3	P42330	AK1C3_HUMAN	AKR1C3		G6PD
M1	3-Oxo-resibufogenin	0.6047	DB01536	Aldo-keto reductase family 1 member C3	P42330	AK1C3_HUMAN	AKR1C3		VDR
M1	3-Oxo-resibufogenin	0.6481	DB08059	Phosphatidylinositol 4,5-bisphosphate 3-kinase catalytic subunit alpha isoform	P42336	PK3CA_HUMAN	PIK3CA		ESRRA
M1	3-Oxo-resibufogenin	0.6481	DB08059	Phosphatidylinositol 4,5-bisphosphate 3-kinase catalytic subunit gamma isoform	P48736	PK3CG_HUMAN	PIK3CG		CYP19A1
M1	3-Oxo-resibufogenin	0.6304	DB02659	Gastrotropin	P51161	FABP6_HUMAN	FABP6		CYP2C9
M1	3-Oxo-resibufogenin	0.65	DB07557	3-oxo-5-beta-steroid 4-dehydrogenase	P51857	AK1D1_HUMAN	AKR1D1		SLC25A4
M1	3-Oxo-resibufogenin	0.6047	DB07447	3-oxo-5-beta-steroid 4-dehydrogenase	P51857	AK1D1_HUMAN	AKR1D1		IMPDH2
M1	3-Oxo-resibufogenin	0.6304	DB01586	Aldo-keto reductase family 1 member C2	P52895	AK1C2_HUMAN	AKR1C2		ACE
M1	3-Oxo-resibufogenin	0.6481	DB08059	Serine/threonine-protein kinase PLK1	P53350	PLK1_HUMAN	PLK1		COX4I1
M1	3-Oxo-resibufogenin	0.6458	DB00421	Voltage-dependent L-type calcium channel subunit beta-3	P54284	CACB3_HUMAN	CACNB3		RARG
M1	3-Oxo-resibufogenin	0.6458	DB00421	Voltage-dependent calcium channel subunit alpha-2/delta-1	P54289	CA2D1_HUMAN	CACNA2D1		HSD3B1
M1	3-Oxo-resibufogenin	0.6304	DB02659	Estrogen-related receptor gamma	P62508	ERR3_HUMAN	ESRRG		HSD17B1
M1	3-Oxo-resibufogenin	0.6444	DB00163	Serine/threonine-protein phosphatase 2A catalytic subunit beta isoform	P62714	PP2AB_HUMAN	PPP2CB		HSP90B1
M1	3-Oxo-resibufogenin	0.6444	DB00163	Serine/threonine-protein phosphatase 2A catalytic subunit alpha isoform	P67775	PP2AA_HUMAN	PPP2CA		COX6B1
M1	3-Oxo-resibufogenin	0.6458	DB00421	Voltage-dependent N-type calcium channel subunit alpha-1B	Q00975	CAC1B_HUMAN	CACNA1B		GABRA1
M1	3-Oxo-resibufogenin	0.6458	DB00421	Voltage-dependent L-type calcium channel subunit alpha-1D	Q01668	CAC1D_HUMAN	CACNA1D		UQCRB
M1	3-Oxo-resibufogenin	0.6304	DB02659	Cytochrome c oxidase subunit 6A2, mitochondrial	Q02221	CX6A2_HUMAN	COX6A2		CD1D
M1	3-Oxo-resibufogenin	0.6458	DB00421	Voltage-dependent L-type calcium channel subunit beta-1	Q02641	CACB1_HUMAN	CACNB1		COX7C
M1	3-Oxo-resibufogenin	0.6458	DB00421	Voltage-dependent calcium channel gamma-1 subunit	Q06432	CCG1_HUMAN	CACNG1		ABO
M1	3-Oxo-resibufogenin	0.6047	DB02854	Bile salt sulfotransferase	Q06520	ST2A1_HUMAN	SULT2A1		PRLR
M1	3-Oxo-resibufogenin	0.6458	DB00421	Voltage-dependent L-type calcium channel subunit beta-2	Q08289	CACB2_HUMAN	CACNB2		PRKCA
M1	3-Oxo-resibufogenin	0.6458	DB00421	Voltage-dependent L-type calcium channel subunit alpha-1S	Q13698	CAC1S_HUMAN	CACNA1S		SRD5A1
M1	3-Oxo-resibufogenin	0.6458	DB00421	Voltage-dependent L-type calcium channel subunit alpha-1C	Q13936	CAC1C_HUMAN	CACNA1C		GABRB1
M1	3-Oxo-resibufogenin	0.65	DB07557	Nuclear receptor subfamily 1 group I member 3	Q14994	NR1I3_HUMAN	NR1I3		GABRG2
M1	3-Oxo-resibufogenin	0.6364	DB03758	[Pyruvate dehydrogenase (acetyl-transferring)] kinase isozyme 3, mitochondrial	Q15120	PDK3_HUMAN	PDK3		CYP11B2
M1	3-Oxo-resibufogenin	0.6	DB06871	Nuclear receptor coactivator 2	Q15596	NCOA2_HUMAN	NCOA2		ORM2
M1	3-Oxo-resibufogenin	0.6596	DB08220	Nuclear receptor coactivator 1	Q15788	NCOA1_HUMAN	NCOA1		RXRA
M1	3-Oxo-resibufogenin	0.65	DB07557	Nuclear receptor coactivator 1	Q15788	NCOA1_HUMAN	NCOA1		CEL
M1	3-Oxo-resibufogenin	0.6458	DB00421	Voltage-dependent L-type calcium channel subunit beta-1	Q6TME4	Q6TME4_HUMAN	CACNB1		COX5A
M1	3-Oxo-resibufogenin	0.6304	DB02659	Ferrochelatase	Q7KZA3	Q7KZA3_HUMAN	DKFZp686P18130		ITGAL
M1	3-Oxo-resibufogenin	0.6304	DB07690	Elongation factor Tu GTP-binding domain-containing protein 1	Q7Z2Z2	ETUD1_HUMAN	EFTUD1		CYP2B6
M1	3-Oxo-resibufogenin	0.6458	DB00421	Voltage-dependent calcium channel subunit alpha-2/delta-3	Q8IZS8	CA2D3_HUMAN	CACNA2D3		IMPDH1
M1	3-Oxo-resibufogenin	0.6047	DB02854	Estradiol 17-beta-dehydrogenase 11	Q8NBQ5	DHB11_HUMAN	HSD17B11		CNR1
M1	3-Oxo-resibufogenin	0.6596	DB08220	Bile acid receptor	Q96RI1	NR1H4_HUMAN	NR1H4		SDHB
M1	3-Oxo-resibufogenin	0.6304	DB06777	Bile acid receptor	Q96RI1	NR1H4_HUMAN	NR1H4		COMT
M1	3-Oxo-resibufogenin	0.6458	DB00421	Polyprenol reductase	Q9H8P0	PORED_HUMAN	SRD5A3		UQCRC2
M1	3-Oxo-resibufogenin	0.6458	DB00421	Voltage-dependent calcium channel subunit alpha-2/delta-2	Q9NY47	CA2D2_HUMAN	CACNA2D2		FECH
M1	3-Oxo-resibufogenin	0.6458	DB00421	Voltage-dependent T-type calcium channel subunit alpha-1I	Q9P0X4	CAC1I_HUMAN	CACNA1I		CES1
M1	3-Oxo-resibufogenin	0.6444	DB00163	SEC14-like protein 4	Q9UDX3	S14L4_HUMAN	SEC14L4		PTGS1
M1	3-Oxo-resibufogenin	0.6444	DB00163	SEC14-like protein 3	Q9UDX4	S14L3_HUMAN	SEC14L3		GLRA2
M2	3-epi-bufalin	0.617	DB01708	Sulfotransferase family cytosolic 2B member 1	O00204	ST2B1_HUMAN	SULT2B1		DGKA
M2	3-epi-bufalin	0.6042	DB02789	Sulfotransferase family cytosolic 2B member 1	O00204	ST2B1_HUMAN	SULT2B1		GABRR1
M2	3-epi-bufalin	0.617	DB01708	Gamma-aminobutyric acid receptor subunit pi	O00591	GBRP_HUMAN	GABRP		COX7A1
M2	3-epi-bufalin	0.6078	DB02859	Acetyl-CoA carboxylase 2	O00763	ACACB_HUMAN	ACACB		COX7B
M2	3-epi-bufalin	0.6078	DB02205	Glyceraldehyde-3-phosphate dehydrogenase, testis-specific	O14556	G3PT_HUMAN	GAPDHS		ATP5A1
M2	3-epi-bufalin	0.617	DB01708	Gamma-aminobutyric acid receptor subunit delta	O14764	GBRD_HUMAN	GABRD		S100P
M2	3-epi-bufalin	0.617	DB01708	Glutamate receptor ionotropic, NMDA 2D	O15399	NMDE4_HUMAN	GRIN2D		HSD3B2
M2	3-epi-bufalin	0.617	DB01708	Glutamate receptor ionotropic, NMDA 3B	O60391	NMD3B_HUMAN	GRIN3B		PDE4A
M2	3-epi-bufalin	0.6111	DB00466	Glycine receptor subunit alpha-3	O75311	GLRA3_HUMAN	GLRA3		PIK3R1
M2	3-epi-bufalin	0.6667	DB00783	Nuclear receptor subfamily 1 group I member 2	O75469	NR1I2_HUMAN	NR1I2		GABRB3
M2	3-epi-bufalin	0.6596	DB00163	Nuclear receptor subfamily 1 group I member 2	O75469	NR1I2_HUMAN	NR1I2		MAPK1
M2	3-epi-bufalin	0.6522	DB00977	Nuclear receptor subfamily 1 group I member 2	O75469	NR1I2_HUMAN	NR1I2		HSD11B1
M2	3-epi-bufalin	0.617	DB01708	Nuclear receptor subfamily 1 group I member 2	O75469	NR1I2_HUMAN	NR1I2		SDHA
M2	3-epi-bufalin	0.6596	DB00163	SEC14-like protein 2	O76054	S14L2_HUMAN	SEC14L2		SRD5A2
M2	3-epi-bufalin	0.6226	DB02587	Adenylate cyclase type 5	O95622	ADCY5_HUMAN	ADCY5		GABRA5
M2	3-epi-bufalin	0.7174	DB02659	Alcohol dehydrogenase 1C	P00326	ADH1G_HUMAN	ADH1C		UQCRC1
M2	3-epi-bufalin	0.7174	DB02659	Cytochrome c oxidase subunit 1	P00395	COX1_HUMAN	MT-CO1		CCKAR
M2	3-epi-bufalin	0.7174	DB02659	Cytochrome c oxidase subunit 2	P00403	COX2_HUMAN	MT-CO2		CDA
M2	3-epi-bufalin	0.7174	DB02659	Cytochrome c oxidase subunit 3	P00414	COX3_HUMAN	MT-CO3		GABRA3
M2	3-epi-bufalin	0.6977	DB02854	Ig gamma-2 chain C region	P01859	IGHG2_HUMAN	IGHG2		CNR2
M2	3-epi-bufalin	0.6809	DB08510	Ig gamma-2 chain C region	P01859	IGHG2_HUMAN	IGHG2		PTGER1
M2	3-epi-bufalin	0.6275	DB08547	Ig gamma-2 chain C region	P01859	IGHG2_HUMAN	IGHG2		NOS2
M2	3-epi-bufalin	0.6889	DB06871	Estrogen receptor	P03372	ESR1_HUMAN	ESR1		PTGS2
M2	3-epi-bufalin	0.6731	DB01108	Estrogen receptor	P03372	ESR1_HUMAN	ESR1		OPRM1
M2	3-epi-bufalin	0.6667	DB00783	Estrogen receptor	P03372	ESR1_HUMAN	ESR1		RORA
M2	3-epi-bufalin	0.6596	DB04573	Estrogen receptor	P03372	ESR1_HUMAN	ESR1		PTGER4
M2	3-epi-bufalin	0.6596	DB01357	Estrogen receptor	P03372	ESR1_HUMAN	ESR1		SOAT1
M2	3-epi-bufalin	0.6591	DB00655	Estrogen receptor	P03372	ESR1_HUMAN	ESR1		ATP5C1
M2	3-epi-bufalin	0.6522	DB04575	Estrogen receptor	P03372	ESR1_HUMAN	ESR1		PPP1CC
M2	3-epi-bufalin	0.6522	DB00977	Estrogen receptor	P03372	ESR1_HUMAN	ESR1		PPARG
M2	3-epi-bufalin	0.6458	DB07678	Estrogen receptor	P03372	ESR1_HUMAN	ESR1		RPL3
M2	3-epi-bufalin	0.64	DB07087	Estrogen receptor	P03372	ESR1_HUMAN	ESR1		OPRD1
M2	3-epi-bufalin	0.6275	DB07707	Estrogen receptor	P03372	ESR1_HUMAN	ESR1		OPRK1
M2	3-epi-bufalin	0.617	DB01708	Estrogen receptor	P03372	ESR1_HUMAN	ESR1		OPRL1
M2	3-epi-bufalin	0.6296	DB00641	3-hydroxy-3-methylglutaryl-coenzyme A reductase	P04035	HMDH_HUMAN	HMGCR		AKR1C3
M2	3-epi-bufalin	0.6038	DB00227	3-hydroxy-3-methylglutaryl-coenzyme A reductase	P04035	HMDH_HUMAN	HMGCR		PIK3CA
M2	3-epi-bufalin	0.7174	DB02659	Phospholipase A2	P04054	PA21B_HUMAN	PLA2G1B		MTOR
M2	3-epi-bufalin	0.6316	DB01410	Glucocorticoid receptor	P04150	GCR_HUMAN	NR3C1		PTGFR
M2	3-epi-bufalin	0.6122	DB00253	Glucocorticoid receptor	P04150	GCR_HUMAN	NR3C1		PTGER3
M2	3-epi-bufalin	0.6034	DB01260	Glucocorticoid receptor	P04150	GCR_HUMAN	NR3C1		PTGER2
M2	3-epi-bufalin	0.6034	DB01222	Glucocorticoid receptor	P04150	GCR_HUMAN	NR3C1		PTGIR
M2	3-epi-bufalin	0.6	DB01380	Glucocorticoid receptor	P04150	GCR_HUMAN	NR3C1		GABRA2
M2	3-epi-bufalin	0.6	DB03010	Tubulin beta-4A chain	P04350	TBB4A_HUMAN	TUBB4A		GABRB2
M2	3-epi-bufalin	0.6667	DB02342	Cytochrome P450 1A1	P04798	CP1A1_HUMAN	CYP1A1		UQCRFS1
M2	3-epi-bufalin	0.6909	DB00511	Sodium/potassium-transporting ATPase subunit alpha-1	P05023	AT1A1_HUMAN	ATP1A1		GABRA4
M2	3-epi-bufalin	0.6909	DB01396	Sodium/potassium-transporting ATPase subunit alpha-1	P05023	AT1A1_HUMAN	ATP1A1		PIK3CG
M2	3-epi-bufalin	0.6786	DB00390	Sodium/potassium-transporting ATPase subunit alpha-1	P05023	AT1A1_HUMAN	ATP1A1		METAP2
M2	3-epi-bufalin	0.6552	DB01092	Sodium/potassium-transporting ATPase subunit alpha-1	P05023	AT1A1_HUMAN	ATP1A1		FABP6
M2	3-epi-bufalin	0.6441	DB01078	Sodium/potassium-transporting ATPase subunit alpha-1	P05023	AT1A1_HUMAN	ATP1A1		CLCN2
M2	3-epi-bufalin	0.62	DB05812	Steroid 17-alpha-hydroxylase/17,20 lyase	P05093	CP17A_HUMAN	CYP17A1		NR0B1
M2	3-epi-bufalin	0.6296	DB00641	Integrin beta-2	P05107	ITB2_HUMAN	ITGB2		AKR1D1
M2	3-epi-bufalin	0.6596	DB00163	Protein kinase C beta type	P05771	KPCB_HUMAN	PRKCB		AKR1C2
M2	3-epi-bufalin	0.6383	DB02998	Progesterone receptor	P06401	PRGR_HUMAN	PGR		PLK1
M2	3-epi-bufalin	0.6327	DB01395	Progesterone receptor	P06401	PRGR_HUMAN	PGR		METAP1
M2	3-epi-bufalin	0.6042	DB00717	Progesterone receptor	P06401	PRGR_HUMAN	PGR		CACNB3
M2	3-epi-bufalin	0.6	DB03010	Tubulin beta chain	P07437	TBB5_HUMAN	TUBB		CACNA2D1
M2	3-epi-bufalin	0.6538	DB00700	Mineralocorticoid receptor	P08235	MCR_HUMAN	NR3C2		MTTP
M2	3-epi-bufalin	0.6327	DB01395	Mineralocorticoid receptor	P08235	MCR_HUMAN	NR3C2		YWHAE
M2	3-epi-bufalin	0.7174	DB02659	Cytochrome c oxidase subunit 6C	P09669	COX6C_HUMAN	COX6C		ESRRG
M2	3-epi-bufalin	0.6596	DB00163	Arachidonate 5-lipoxygenase	P09917	LOX5_HUMAN	ALOX5		PPP2CB
M2	3-epi-bufalin	0.7174	DB02659	Cytochrome c oxidase subunit 8A, mitochondrial	P10176	COX8A_HUMAN	COX8A		FKBP1A
M2	3-epi-bufalin	0.7609	DB00621	Androgen receptor	P10275	ANDR_HUMAN	AR		GNAS
M2	3-epi-bufalin	0.6977	DB02901	Androgen receptor	P10275	ANDR_HUMAN	AR		PPP2CA
M2	3-epi-bufalin	0.6818	DB01481	Androgen receptor	P10275	ANDR_HUMAN	AR		ACTA1
M2	3-epi-bufalin	0.6818	DB00858	Androgen receptor	P10275	ANDR_HUMAN	AR		TUBA1B
M2	3-epi-bufalin	0.6383	DB00624	Androgen receptor	P10275	ANDR_HUMAN	AR		TUBA4A
M2	3-epi-bufalin	0.6383	DB02998	Androgen receptor	P10275	ANDR_HUMAN	AR		TUBB4B
M2	3-epi-bufalin	0.6383	DB01541	Androgen receptor	P10275	ANDR_HUMAN	AR		GABRE
M2	3-epi-bufalin	0.6327	DB01395	Androgen receptor	P10275	ANDR_HUMAN	AR		ARF1
M2	3-epi-bufalin	0.625	DB06710	Androgen receptor	P10275	ANDR_HUMAN	AR		CACNA1B
M2	3-epi-bufalin	0.625	DB01564	Androgen receptor	P10275	ANDR_HUMAN	AR		CACNA1D
M2	3-epi-bufalin	0.7174	DB02659	Cytochrome c oxidase subunit 5B, mitochondrial	P10606	COX5B_HUMAN	COX5B		COX6A2
M2	3-epi-bufalin	0.6383	DB05107	Glucose-6-phosphate 1-dehydrogenase	P11413	G6PD_HUMAN	G6PD		CACNB1
M2	3-epi-bufalin	0.62	DB02300	Vitamin D3 receptor	P11473	VDR_HUMAN	VDR		TOP2B
M2	3-epi-bufalin	0.6667	DB02342	Aromatase	P11511	CP19A_HUMAN	CYP19A1		PPARD
M2	3-epi-bufalin	0.6042	DB00894	Aromatase	P11511	CP19A_HUMAN	CYP19A1		AKR1C1
M2	3-epi-bufalin	0.7174	DB02659	Cytochrome c oxidase subunit 4 isoform 1, mitochondrial	P13073	COX41_HUMAN	COX4I1		GRIN1
M2	3-epi-bufalin	0.6731	DB01108	3 beta-hydroxysteroid dehydrogenase/Delta 5-->4-isomerase type 1	P14060	3BHS1_HUMAN	HSD3B1		PRKCD
M2	3-epi-bufalin	0.6977	DB02901	Estradiol 17-beta-dehydrogenase 1	P14061	DHB1_HUMAN	HSD17B1		CACNG1
M2	3-epi-bufalin	0.617	DB01708	Estradiol 17-beta-dehydrogenase 1	P14061	DHB1_HUMAN	HSD17B1		SULT2A1
M2	3-epi-bufalin	0.6042	DB02187	Estradiol 17-beta-dehydrogenase 1	P14061	DHB1_HUMAN	HSD17B1		PDE4B
M2	3-epi-bufalin	0.7174	DB02659	Cytochrome c oxidase subunit 6B1	P14854	CX6B1_HUMAN	COX6B1		PPARA
M2	3-epi-bufalin	0.6818	DB05087	Gamma-aminobutyric acid receptor subunit alpha-1	P14867	GBRA1_HUMAN	GABRA1		TGM3
M2	3-epi-bufalin	0.617	DB01708	Gamma-aminobutyric acid receptor subunit alpha-1	P14867	GBRA1_HUMAN	GABRA1		CACNB2
M2	3-epi-bufalin	0.6111	DB00466	Gamma-aminobutyric acid receptor subunit alpha-1	P14867	GBRA1_HUMAN	GABRA1		ADCY2
M2	3-epi-bufalin	0.7174	DB02659	Cytochrome c oxidase subunit 7C, mitochondrial	P15954	COX7C_HUMAN	COX7C		PDE4C
M2	3-epi-bufalin	0.6596	DB00163	Protein kinase C alpha type	P17252	KPCA_HUMAN	PRKCA		PDE4D
M2	3-epi-bufalin	0.617	DB01708	Gamma-aminobutyric acid receptor subunit beta-1	P18505	GBRB1_HUMAN	GABRB1		KCNMA1
M2	3-epi-bufalin	0.617	DB01708	Gamma-aminobutyric acid receptor subunit gamma-2	P18507	GBRG2_HUMAN	GABRG2		GRIN2A
M2	3-epi-bufalin	0.7174	DB02659	Cytochrome c oxidase subunit 5A, mitochondrial	P20674	COX5A_HUMAN	COX5A		GRIN2B
M2	3-epi-bufalin	0.6038	DB00227	Integrin alpha-L	P20701	ITAL_HUMAN	ITGAL		TUBB3
M2	3-epi-bufalin	0.6531	DB00486	Cannabinoid receptor 1	P21554	CNR1_HUMAN	CNR1		CACNA1S
M2	3-epi-bufalin	0.6667	DB02342	Catechol O-methyltransferase	P21964	COMT_HUMAN	COMT		TUBA3C
M2	3-epi-bufalin	0.7174	DB02659	Ferrochelatase, mitochondrial	P22830	HEMH_HUMAN	FECH		CACNA1C
M2	3-epi-bufalin	0.7174	DB02659	Liver carboxylesterase 1	P23141	EST1_HUMAN	CES1		PTGR1
M2	3-epi-bufalin	0.62	DB08224	Liver carboxylesterase 1	P23141	EST1_HUMAN	CES1		GRIN2C
M2	3-epi-bufalin	0.6111	DB00466	Glycine receptor subunit alpha-2	P23416	GLRA2_HUMAN	GLRA2		NR1I3
M2	3-epi-bufalin	0.6596	DB00163	Diacylglycerol kinase alpha	P23743	DGKA_HUMAN	DGKA		PDK3
M2	3-epi-bufalin	0.6111	DB00466	Gamma-aminobutyric acid receptor subunit rho-1	P24046	GBRR1_HUMAN	GABRR1		NCOA2
M2	3-epi-bufalin	0.7174	DB02659	Cytochrome c oxidase subunit 7A1, mitochondrial	P24310	CX7A1_HUMAN	COX7A1		MED1
M2	3-epi-bufalin	0.7174	DB02659	Cytochrome c oxidase subunit 7B, mitochondrial	P24311	COX7B_HUMAN	COX7B		NCOA1
M2	3-epi-bufalin	0.6731	DB01108	3 beta-hydroxysteroid dehydrogenase/Delta 5-->4-isomerase type 2	P26439	3BHS2_HUMAN	HSD3B2		ETFDH
M2	3-epi-bufalin	0.617	DB01708	Gamma-aminobutyric acid receptor subunit beta-3	P28472	GBRB3_HUMAN	GABRB3		GABRA6
M2	3-epi-bufalin	0.6038	DB02329	Corticosteroid 11-beta-dehydrogenase isozyme 1	P28845	DHI1_HUMAN	HSD11B1		PTGIS
M2	3-epi-bufalin	0.6818	DB05087	Gamma-aminobutyric acid receptor subunit alpha-5	P31644	GBRA5_HUMAN	GABRA5		HIF1A
M2	3-epi-bufalin	0.617	DB01708	Gamma-aminobutyric acid receptor subunit alpha-5	P31644	GBRA5_HUMAN	GABRA5		CYP1B1
M2	3-epi-bufalin	0.6818	DB05087	Gamma-aminobutyric acid receptor subunit alpha-3	P34903	GBRA3_HUMAN	GABRA3		UGT3A1
M2	3-epi-bufalin	0.617	DB01708	Gamma-aminobutyric acid receptor subunit alpha-3	P34903	GBRA3_HUMAN	GABRA3		HIBCH
M2	3-epi-bufalin	0.6531	DB00486	Cannabinoid receptor 2	P34972	CNR2_HUMAN	CNR2		AADACL2
M2	3-epi-bufalin	0.6607	DB02169	Serine/threonine-protein phosphatase PP1-gamma catalytic subunit	P36873	PP1G_HUMAN	PPP1CC		TUBA1A
M2	3-epi-bufalin	0.6275	DB00374	Prostacyclin receptor	P43119	PI2R_HUMAN	PTGIR		DKFZp686P18130
M2	3-epi-bufalin	0.6	DB01240	Prostacyclin receptor	P43119	PI2R_HUMAN	PTGIR		EFTUD1
M2	3-epi-bufalin	0.6818	DB05087	Gamma-aminobutyric acid receptor subunit alpha-2	P47869	GBRA2_HUMAN	GABRA2		CACNA2D3
M2	3-epi-bufalin	0.617	DB01708	Gamma-aminobutyric acid receptor subunit alpha-2	P47869	GBRA2_HUMAN	GABRA2		GABRG1
M2	3-epi-bufalin	0.617	DB01708	Gamma-aminobutyric acid receptor subunit beta-2	P47870	GBRB2_HUMAN	GABRB2		PTGR2
M2	3-epi-bufalin	0.6818	DB05087	Gamma-aminobutyric acid receptor subunit alpha-4	P48169	GBRA4_HUMAN	GABRA4		HSD17B11
M2	3-epi-bufalin	0.617	DB01708	Gamma-aminobutyric acid receptor subunit alpha-4	P48169	GBRA4_HUMAN	GABRA4		NOXO1
M2	3-epi-bufalin	0.7174	DB02659	Gastrotropin	P51161	FABP6_HUMAN	FABP6		GRIN3A
M2	3-epi-bufalin	0.6275	DB01046	Chloride channel protein 2	P51788	CLCN2_HUMAN	CLCN2		ESR2
M2	3-epi-bufalin	0.6977	DB07447	3-oxo-5-beta-steroid 4-dehydrogenase	P51857	AK1D1_HUMAN	AKR1D1		HDAC2
M2	3-epi-bufalin	0.7174	DB01586	Aldo-keto reductase family 1 member C2	P52895	AK1C2_HUMAN	AKR1C2		NR1H4
M2	3-epi-bufalin	0.6383	DB07768	Aldo-keto reductase family 1 member C2	P52895	AK1C2_HUMAN	AKR1C2		CYTH2
M2	3-epi-bufalin	0.7174	DB02659	Estrogen-related receptor gamma	P62508	ERR3_HUMAN	ESRRG		SDHC
M2	3-epi-bufalin	0.6596	DB00163	Serine/threonine-protein phosphatase 2A catalytic subunit beta isoform	P62714	PP2AB_HUMAN	PPP2CB		SIGMAR1
M2	3-epi-bufalin	0.6226	DB02587	Guanine nucleotide-binding protein G(s) subunit alpha isoforms short	P63092	GNAS2_HUMAN	GNAS		SLC29A1
M2	3-epi-bufalin	0.6596	DB00163	Serine/threonine-protein phosphatase 2A catalytic subunit alpha isoform	P67775	PP2AA_HUMAN	PPP2CA		SMO
M2	3-epi-bufalin	0.6	DB03010	Tubulin alpha-1B chain	P68363	TBA1B_HUMAN	TUBA1B		GABRG3
M2	3-epi-bufalin	0.6	DB03010	Tubulin alpha-4A chain	P68366	TBA4A_HUMAN	TUBA4A		VKORC1
M2	3-epi-bufalin	0.6	DB03010	Tubulin beta-4B chain	P68371	TBB4B_HUMAN	TUBB4B		TUBA1C
M2	3-epi-bufalin	0.617	DB01708	Gamma-aminobutyric acid receptor subunit epsilon	P78334	GBRE_HUMAN	GABRE		P2RY12
M2	3-epi-bufalin	0.6444	DB07348	ADP-ribosylation factor 1	P84077	ARF1_HUMAN	ARF1		TUBB1
M2	3-epi-bufalin	0.7174	DB02659	Cytochrome c oxidase subunit 6A2, mitochondrial	Q02221	CX6A2_HUMAN	COX6A2		SRD5A3
M2	3-epi-bufalin	0.6275	DB00374	Peroxisome proliferator-activated receptor delta	Q03181	PPARD_HUMAN	PPARD		NCOA5
M2	3-epi-bufalin	0.6383	DB07768	Aldo-keto reductase family 1 member C1	Q04828	AK1C1_HUMAN	AKR1C1		CACNA2D2
M2	3-epi-bufalin	0.617	DB01708	Glutamate receptor ionotropic, NMDA 1	Q05586	NMDZ1_HUMAN	GRIN1		TUBA8
M2	3-epi-bufalin	0.6977	DB02854	Bile salt sulfotransferase	Q06520	ST2A1_HUMAN	SULT2A1		CACNA1I
M2	3-epi-bufalin	0.617	DB01708	Bile salt sulfotransferase	Q06520	ST2A1_HUMAN	SULT2A1		UQCR10
M2	3-epi-bufalin	0.617	DB01708	Peroxisome proliferator-activated receptor alpha	Q07869	PPARA_HUMAN	PPARA		SEC14L4
M2	3-epi-bufalin	0.6226	DB02587	Adenylate cyclase type 2	Q08462	ADCY2_HUMAN	ADCY2		SEC14L3
M2	3-epi-bufalin	0.617	DB01708	Glutamate receptor ionotropic, NMDA 2A	Q12879	NMDE1_HUMAN	GRIN2A		GABRQ
M2	3-epi-bufalin	0.617	DB01708	Glutamate receptor ionotropic, NMDA 2B	Q13224	NMDE2_HUMAN	GRIN2B		HS3ST3A1
M2	3-epi-bufalin	0.6	DB03010	Tubulin beta-3 chain	Q13509	TBB3_HUMAN	TUBB3
M2	3-epi-bufalin	0.6	DB03010	Tubulin alpha-3C/D chain	Q13748	TBA3C_HUMAN	TUBA3C
M2	3-epi-bufalin	0.617	DB01708	Glutamate receptor ionotropic, NMDA 2C	Q14957	NMDE3_HUMAN	GRIN2C
M2	3-epi-bufalin	0.617	DB01708	Nuclear receptor subfamily 1 group I member 3	Q14994	NR1I3_HUMAN	NR1I3
M2	3-epi-bufalin	0.6136	DB01889	Nuclear receptor subfamily 1 group I member 3	Q14994	NR1I3_HUMAN	NR1I3
M2	3-epi-bufalin	0.6889	DB06871	Nuclear receptor coactivator 2	Q15596	NCOA2_HUMAN	NCOA2
M2	3-epi-bufalin	0.6458	DB07678	Nuclear receptor coactivator 2	Q15596	NCOA2_HUMAN	NCOA2
M2	3-epi-bufalin	0.64	DB07087	Nuclear receptor coactivator 2	Q15596	NCOA2_HUMAN	NCOA2
M2	3-epi-bufalin	0.6383	DB02998	Nuclear receptor coactivator 2	Q15596	NCOA2_HUMAN	NCOA2
M2	3-epi-bufalin	0.6275	DB07707	Nuclear receptor coactivator 2	Q15596	NCOA2_HUMAN	NCOA2
M2	3-epi-bufalin	0.6735	DB08220	Nuclear receptor coactivator 1	Q15788	NCOA1_HUMAN	NCOA1
M2	3-epi-bufalin	0.6818	DB05087	Gamma-aminobutyric acid receptor subunit alpha-6	Q16445	GBRA6_HUMAN	GABRA6
M2	3-epi-bufalin	0.617	DB01708	Gamma-aminobutyric acid receptor subunit alpha-6	Q16445	GBRA6_HUMAN	GABRA6
M2	3-epi-bufalin	0.6	DB01240	Prostacyclin synthase	Q16647	PTGIS_HUMAN	PTGIS
M2	3-epi-bufalin	0.6667	DB02342	Hypoxia-inducible factor 1-alpha	Q16665	HIF1A_HUMAN	HIF1A
M2	3-epi-bufalin	0.6667	DB02342	Cytochrome P450 1B1	Q16678	CP1B1_HUMAN	CYP1B1
M2	3-epi-bufalin	0.6667	DB07815	Arylacetamide deacetylase-like 2	Q6P093	ADCL2_HUMAN	AADACL2
M2	3-epi-bufalin	0.6275	DB07814	Arylacetamide deacetylase-like 2	Q6P093	ADCL2_HUMAN	AADACL2
M2	3-epi-bufalin	0.6	DB03010	Tubulin alpha-1A chain	Q71U36	TBA1A_HUMAN	TUBA1A
M2	3-epi-bufalin	0.7174	DB02659	Ferrochelatase	Q7KZA3	Q7KZA3_HUMAN	DKFZp686P18130
M2	3-epi-bufalin	0.7174	DB07690	Elongation factor Tu GTP-binding domain-containing protein 1	Q7Z2Z2	ETUD1_HUMAN	EFTUD1
M2	3-epi-bufalin	0.617	DB01708	Gamma-aminobutyric acid receptor subunit gamma-1	Q8N1C3	GBRG1_HUMAN	GABRG1
M2	3-epi-bufalin	0.6977	DB02854	Estradiol 17-beta-dehydrogenase 11	Q8NBQ5	DHB11_HUMAN	HSD17B11
M2	3-epi-bufalin	0.617	DB01708	Glutamate receptor ionotropic, NMDA 3A	Q8TCU5	NMD3A_HUMAN	GRIN3A
M2	3-epi-bufalin	0.6731	DB01108	Estrogen receptor beta	Q92731	ESR2_HUMAN	ESR2
M2	3-epi-bufalin	0.6667	DB00783	Estrogen receptor beta	Q92731	ESR2_HUMAN	ESR2
M2	3-epi-bufalin	0.6596	DB04573	Estrogen receptor beta	Q92731	ESR2_HUMAN	ESR2
M2	3-epi-bufalin	0.6596	DB07702	Estrogen receptor beta	Q92731	ESR2_HUMAN	ESR2
M2	3-epi-bufalin	0.6591	DB03882	Estrogen receptor beta	Q92731	ESR2_HUMAN	ESR2
M2	3-epi-bufalin	0.617	DB01708	Estrogen receptor beta	Q92731	ESR2_HUMAN	ESR2
M2	3-epi-bufalin	0.6038	DB00227	Histone deacetylase 2	Q92769	HDAC2_HUMAN	HDAC2
M2	3-epi-bufalin	0.7174	DB06777	Bile acid receptor	Q96RI1	NR1H4_HUMAN	NR1H4
M2	3-epi-bufalin	0.6735	DB08220	Bile acid receptor	Q96RI1	NR1H4_HUMAN	NR1H4
M2	3-epi-bufalin	0.6444	DB07348	Cytohesin-2	Q99418	CYH2_HUMAN	CYTH2
M2	3-epi-bufalin	0.617	DB01708	Sigma non-opioid intracellular receptor 1	Q99720	SGMR1_HUMAN	SIGMAR1
M2	3-epi-bufalin	0.617	DB01708	Gamma-aminobutyric acid receptor subunit gamma-3	Q99928	GBRG3_HUMAN	GABRG3
M2	3-epi-bufalin	0.6	DB03010	Tubulin alpha-1C chain	Q9BQE3	TBA1C_HUMAN	TUBA1C
M2	3-epi-bufalin	0.6275	DB00374	P2Y purinoceptor 12	Q9H244	P2Y12_HUMAN	P2RY12
M2	3-epi-bufalin	0.6	DB01240	P2Y purinoceptor 12	Q9H244	P2Y12_HUMAN	P2RY12
M2	3-epi-bufalin	0.6	DB03010	Tubulin beta-1 chain	Q9H4B7	TBB1_HUMAN	TUBB1
M2	3-epi-bufalin	0.6596	DB07702	Nuclear receptor coactivator 5	Q9HCD5	NCOA5_HUMAN	NCOA5
M2	3-epi-bufalin	0.6	DB03010	Tubulin alpha-8 chain	Q9NY65	TBA8_HUMAN	TUBA8
M2	3-epi-bufalin	0.6596	DB00163	SEC14-like protein 4	Q9UDX3	S14L4_HUMAN	SEC14L4
M2	3-epi-bufalin	0.6596	DB00163	SEC14-like protein 3	Q9UDX4	S14L3_HUMAN	SEC14L3
M2	3-epi-bufalin	0.617	DB01708	Gamma-aminobutyric acid receptor subunit theta	Q9UN88	GBRT_HUMAN	GABRQ
P1	Resibufogenin	0.6304	DB01708	Sulfotransferase family cytosolic 2B member 1	O00204	ST2B1_HUMAN	SULT2B1
P1	Resibufogenin	0.617	DB02789	Sulfotransferase family cytosolic 2B member 1	O00204	ST2B1_HUMAN	SULT2B1
P1	Resibufogenin	0.6304	DB01708	Gamma-aminobutyric acid receptor subunit pi	O00591	GBRP_HUMAN	GABRP
P1	Resibufogenin	0.62	DB02859	Acetyl-CoA carboxylase 2	O00763	ACACB_HUMAN	ACACB
P1	Resibufogenin	0.62	DB02205	Glyceraldehyde-3-phosphate dehydrogenase, testis-specific	O14556	G3PT_HUMAN	GAPDHS
P1	Resibufogenin	0.6304	DB01708	Gamma-aminobutyric acid receptor subunit delta	O14764	GBRD_HUMAN	GABRD
P1	Resibufogenin	0.6304	DB01708	Glutamate receptor ionotropic, NMDA 2D	O15399	NMDE4_HUMAN	GRIN2D
P1	Resibufogenin	0.6304	DB01708	Glutamate receptor ionotropic, NMDA 3B	O60391	NMD3B_HUMAN	GRIN3B
P1	Resibufogenin	0.6818	DB00783	Nuclear receptor subfamily 1 group I member 2	O75469	NR1I2_HUMAN	NR1I2
P1	Resibufogenin	0.6739	DB00163	Nuclear receptor subfamily 1 group I member 2	O75469	NR1I2_HUMAN	NR1I2
P1	Resibufogenin	0.6667	DB00977	Nuclear receptor subfamily 1 group I member 2	O75469	NR1I2_HUMAN	NR1I2
P1	Resibufogenin	0.6304	DB01708	Nuclear receptor subfamily 1 group I member 2	O75469	NR1I2_HUMAN	NR1I2
P1	Resibufogenin	0.6739	DB00163	SEC14-like protein 2	O76054	S14L2_HUMAN	SEC14L2
P1	Resibufogenin	0.6346	DB02587	Adenylate cyclase type 5	O95622	ADCY5_HUMAN	ADCY5
P1	Resibufogenin	0.7333	DB02659	Alcohol dehydrogenase 1C	P00326	ADH1G_HUMAN	ADH1C
P1	Resibufogenin	0.6042	DB07714	Glutathione reductase, mitochondrial	P00390	GSHR_HUMAN	GSR
P1	Resibufogenin	0.7333	DB02659	Cytochrome c oxidase subunit 1	P00395	COX1_HUMAN	MT-CO1
P1	Resibufogenin	0.7333	DB02659	Cytochrome c oxidase subunit 2	P00403	COX2_HUMAN	MT-CO2
P1	Resibufogenin	0.7333	DB02659	Cytochrome c oxidase subunit 3	P00414	COX3_HUMAN	MT-CO3
P1	Resibufogenin	0.7143	DB02854	Ig gamma-2 chain C region	P01859	IGHG2_HUMAN	IGHG2
P1	Resibufogenin	0.6957	DB08510	Ig gamma-2 chain C region	P01859	IGHG2_HUMAN	IGHG2
P1	Resibufogenin	0.64	DB08547	Ig gamma-2 chain C region	P01859	IGHG2_HUMAN	IGHG2
P1	Resibufogenin	0.6066	DB00497	Alpha-1-acid glycoprotein 1	P02763	A1AG1_HUMAN	ORM1
P1	Resibufogenin	0.7045	DB06871	Estrogen receptor	P03372	ESR1_HUMAN	ESR1
P1	Resibufogenin	0.6818	DB00783	Estrogen receptor	P03372	ESR1_HUMAN	ESR1
P1	Resibufogenin	0.6744	DB00655	Estrogen receptor	P03372	ESR1_HUMAN	ESR1
P1	Resibufogenin	0.6739	DB04573	Estrogen receptor	P03372	ESR1_HUMAN	ESR1
P1	Resibufogenin	0.6739	DB01357	Estrogen receptor	P03372	ESR1_HUMAN	ESR1
P1	Resibufogenin	0.6667	DB04575	Estrogen receptor	P03372	ESR1_HUMAN	ESR1
P1	Resibufogenin	0.6667	DB00977	Estrogen receptor	P03372	ESR1_HUMAN	ESR1
P1	Resibufogenin	0.6596	DB07678	Estrogen receptor	P03372	ESR1_HUMAN	ESR1
P1	Resibufogenin	0.6538	DB01108	Estrogen receptor	P03372	ESR1_HUMAN	ESR1
P1	Resibufogenin	0.6531	DB07087	Estrogen receptor	P03372	ESR1_HUMAN	ESR1
P1	Resibufogenin	0.64	DB07707	Estrogen receptor	P03372	ESR1_HUMAN	ESR1
P1	Resibufogenin	0.6304	DB01708	Estrogen receptor	P03372	ESR1_HUMAN	ESR1
P1	Resibufogenin	0.6415	DB00641	3-hydroxy-3-methylglutaryl-coenzyme A reductase	P04035	HMDH_HUMAN	HMGCR
P1	Resibufogenin	0.6154	DB00227	3-hydroxy-3-methylglutaryl-coenzyme A reductase	P04035	HMDH_HUMAN	HMGCR
P1	Resibufogenin	0.7333	DB02659	Phospholipase A2	P04054	PA21B_HUMAN	PLA2G1B
P1	Resibufogenin	0.6429	DB01410	Glucocorticoid receptor	P04150	GCR_HUMAN	NR3C1
P1	Resibufogenin	0.625	DB00253	Glucocorticoid receptor	P04150	GCR_HUMAN	NR3C1
P1	Resibufogenin	0.614	DB01260	Glucocorticoid receptor	P04150	GCR_HUMAN	NR3C1
P1	Resibufogenin	0.614	DB01222	Glucocorticoid receptor	P04150	GCR_HUMAN	NR3C1
P1	Resibufogenin	0.6111	DB01380	Glucocorticoid receptor	P04150	GCR_HUMAN	NR3C1
P1	Resibufogenin	0.6	DB00896	Glucocorticoid receptor	P04150	GCR_HUMAN	NR3C1
P1	Resibufogenin	0.6102	DB03010	Tubulin beta-4A chain	P04350	TBB4A_HUMAN	TUBB4A
P1	Resibufogenin	0.6809	DB02342	Cytochrome P450 1A1	P04798	CP1A1_HUMAN	CYP1A1
P1	Resibufogenin	0.7037	DB00511	Sodium/potassium-transporting ATPase subunit alpha-1	P05023	AT1A1_HUMAN	ATP1A1
P1	Resibufogenin	0.7037	DB01396	Sodium/potassium-transporting ATPase subunit alpha-1	P05023	AT1A1_HUMAN	ATP1A1
P1	Resibufogenin	0.6909	DB00390	Sodium/potassium-transporting ATPase subunit alpha-1	P05023	AT1A1_HUMAN	ATP1A1
P1	Resibufogenin	0.6667	DB01092	Sodium/potassium-transporting ATPase subunit alpha-1	P05023	AT1A1_HUMAN	ATP1A1
P1	Resibufogenin	0.6552	DB01078	Sodium/potassium-transporting ATPase subunit alpha-1	P05023	AT1A1_HUMAN	ATP1A1
P1	Resibufogenin	0.6327	DB05812	Steroid 17-alpha-hydroxylase/17,20 lyase	P05093	CP17A_HUMAN	CYP17A1
P1	Resibufogenin	0.6415	DB00641	Integrin beta-2	P05107	ITB2_HUMAN	ITGB2
P1	Resibufogenin	0.6739	DB00163	Protein kinase C beta type	P05771	KPCB_HUMAN	PRKCB
P1	Resibufogenin	0.6522	DB02998	Progesterone receptor	P06401	PRGR_HUMAN	PGR
P1	Resibufogenin	0.617	DB00717	Progesterone receptor	P06401	PRGR_HUMAN	PGR
P1	Resibufogenin	0.6122	DB01395	Progesterone receptor	P06401	PRGR_HUMAN	PGR
P1	Resibufogenin	0.6102	DB03010	Tubulin beta chain	P07437	TBB5_HUMAN	TUBB
P1	Resibufogenin	0.6346	DB00700	Mineralocorticoid receptor	P08235	MCR_HUMAN	NR3C2
P1	Resibufogenin	0.6122	DB01395	Mineralocorticoid receptor	P08235	MCR_HUMAN	NR3C2
P1	Resibufogenin	0.7333	DB02659	Cytochrome c oxidase subunit 6C	P09669	COX6C_HUMAN	COX6C
P1	Resibufogenin	0.6739	DB00163	Arachidonate 5-lipoxygenase	P09917	LOX5_HUMAN	ALOX5
P1	Resibufogenin	0.7333	DB02659	Cytochrome c oxidase subunit 8A, mitochondrial	P10176	COX8A_HUMAN	COX8A
P1	Resibufogenin	0.7778	DB00621	Androgen receptor	P10275	ANDR_HUMAN	AR
P1	Resibufogenin	0.7143	DB02901	Androgen receptor	P10275	ANDR_HUMAN	AR
P1	Resibufogenin	0.6977	DB01481	Androgen receptor	P10275	ANDR_HUMAN	AR
P1	Resibufogenin	0.6977	DB00858	Androgen receptor	P10275	ANDR_HUMAN	AR
P1	Resibufogenin	0.6522	DB00624	Androgen receptor	P10275	ANDR_HUMAN	AR
P1	Resibufogenin	0.6522	DB02998	Androgen receptor	P10275	ANDR_HUMAN	AR
P1	Resibufogenin	0.6522	DB01541	Androgen receptor	P10275	ANDR_HUMAN	AR
P1	Resibufogenin	0.6383	DB06710	Androgen receptor	P10275	ANDR_HUMAN	AR
P1	Resibufogenin	0.6383	DB01564	Androgen receptor	P10275	ANDR_HUMAN	AR
P1	Resibufogenin	0.6122	DB01395	Androgen receptor	P10275	ANDR_HUMAN	AR
P1	Resibufogenin	0.6042	DB06870	Androgen receptor	P10275	ANDR_HUMAN	AR
P1	Resibufogenin	0.7333	DB02659	Cytochrome c oxidase subunit 5B, mitochondrial	P10606	COX5B_HUMAN	COX5B
P1	Resibufogenin	0.6522	DB05107	Glucose-6-phosphate 1-dehydrogenase	P11413	G6PD_HUMAN	G6PD
P1	Resibufogenin	0.6327	DB02300	Vitamin D3 receptor	P11473	VDR_HUMAN	VDR
P1	Resibufogenin	0.6809	DB02342	Aromatase	P11511	CP19A_HUMAN	CYP19A1
P1	Resibufogenin	0.617	DB00894	Aromatase	P11511	CP19A_HUMAN	CYP19A1
P1	Resibufogenin	0.6071	DB01024	Inosine-5'-monophosphate dehydrogenase 2	P12268	IMDH2_HUMAN	IMPDH2
P1	Resibufogenin	0.7333	DB02659	Cytochrome c oxidase subunit 4 isoform 1, mitochondrial	P13073	COX41_HUMAN	COX4I1
P1	Resibufogenin	0.6538	DB01108	3 beta-hydroxysteroid dehydrogenase/Delta 5-->4-isomerase type 1	P14060	3BHS1_HUMAN	HSD3B1
P1	Resibufogenin	0.7143	DB02901	Estradiol 17-beta-dehydrogenase 1	P14061	DHB1_HUMAN	HSD17B1
P1	Resibufogenin	0.6304	DB01708	Estradiol 17-beta-dehydrogenase 1	P14061	DHB1_HUMAN	HSD17B1
P1	Resibufogenin	0.617	DB02187	Estradiol 17-beta-dehydrogenase 1	P14061	DHB1_HUMAN	HSD17B1
P1	Resibufogenin	0.7333	DB02659	Cytochrome c oxidase subunit 6B1	P14854	CX6B1_HUMAN	COX6B1
P1	Resibufogenin	0.6977	DB05087	Gamma-aminobutyric acid receptor subunit alpha-1	P14867	GBRA1_HUMAN	GABRA1
P1	Resibufogenin	0.6304	DB01708	Gamma-aminobutyric acid receptor subunit alpha-1	P14867	GBRA1_HUMAN	GABRA1
P1	Resibufogenin	0.7333	DB02659	Cytochrome c oxidase subunit 7C, mitochondrial	P15954	COX7C_HUMAN	COX7C
P1	Resibufogenin	0.6739	DB00163	Protein kinase C alpha type	P17252	KPCA_HUMAN	PRKCA
P1	Resibufogenin	0.6304	DB01708	Gamma-aminobutyric acid receptor subunit beta-1	P18505	GBRB1_HUMAN	GABRB1
P1	Resibufogenin	0.6304	DB01708	Gamma-aminobutyric acid receptor subunit gamma-2	P18507	GBRG2_HUMAN	GABRG2
P1	Resibufogenin	0.6066	DB00497	Alpha-1-acid glycoprotein 2	P19652	A1AG2_HUMAN	ORM2
P1	Resibufogenin	0.7333	DB02659	Cytochrome c oxidase subunit 5A, mitochondrial	P20674	COX5A_HUMAN	COX5A
P1	Resibufogenin	0.6154	DB00227	Integrin alpha-L	P20701	ITAL_HUMAN	ITGAL
P1	Resibufogenin	0.6071	DB01024	Inosine-5'-monophosphate dehydrogenase 1	P20839	IMDH1_HUMAN	IMPDH1
P1	Resibufogenin	0.6667	DB00486	Cannabinoid receptor 1	P21554	CNR1_HUMAN	CNR1
P1	Resibufogenin	0.6809	DB02342	Catechol O-methyltransferase	P21964	COMT_HUMAN	COMT
P1	Resibufogenin	0.7333	DB02659	Ferrochelatase, mitochondrial	P22830	HEMH_HUMAN	FECH
P1	Resibufogenin	0.7333	DB02659	Liver carboxylesterase 1	P23141	EST1_HUMAN	CES1
P1	Resibufogenin	0.6327	DB08224	Liver carboxylesterase 1	P23141	EST1_HUMAN	CES1
P1	Resibufogenin	0.6739	DB00163	Diacylglycerol kinase alpha	P23743	DGKA_HUMAN	DGKA
P1	Resibufogenin	0.7333	DB02659	Cytochrome c oxidase subunit 7A1, mitochondrial	P24310	CX7A1_HUMAN	COX7A1
P1	Resibufogenin	0.7333	DB02659	Cytochrome c oxidase subunit 7B, mitochondrial	P24311	COX7B_HUMAN	COX7B
P1	Resibufogenin	0.6538	DB01108	3 beta-hydroxysteroid dehydrogenase/Delta 5-->4-isomerase type 2	P26439	3BHS2_HUMAN	HSD3B2
P1	Resibufogenin	0.6304	DB01708	Gamma-aminobutyric acid receptor subunit beta-3	P28472	GBRB3_HUMAN	GABRB3
P1	Resibufogenin	0.6154	DB02329	Corticosteroid 11-beta-dehydrogenase isozyme 1	P28845	DHI1_HUMAN	HSD11B1
P1	Resibufogenin	0.6977	DB05087	Gamma-aminobutyric acid receptor subunit alpha-5	P31644	GBRA5_HUMAN	GABRA5
P1	Resibufogenin	0.6304	DB01708	Gamma-aminobutyric acid receptor subunit alpha-5	P31644	GBRA5_HUMAN	GABRA5
P1	Resibufogenin	0.6977	DB05087	Gamma-aminobutyric acid receptor subunit alpha-3	P34903	GBRA3_HUMAN	GABRA3
P1	Resibufogenin	0.6304	DB01708	Gamma-aminobutyric acid receptor subunit alpha-3	P34903	GBRA3_HUMAN	GABRA3
P1	Resibufogenin	0.6667	DB00486	Cannabinoid receptor 2	P34972	CNR2_HUMAN	CNR2
P1	Resibufogenin	0.6066	DB00497	Mu-type opioid receptor	P35372	OPRM_HUMAN	OPRM1
P1	Resibufogenin	0.6727	DB02169	Serine/threonine-protein phosphatase PP1-gamma catalytic subunit	P36873	PP1G_HUMAN	PPP1CC
P1	Resibufogenin	0.6066	DB00497	Delta-type opioid receptor	P41143	OPRD_HUMAN	OPRD1
P1	Resibufogenin	0.6066	DB00497	Kappa-type opioid receptor	P41145	OPRK_HUMAN	OPRK1
P1	Resibufogenin	0.64	DB00374	Prostacyclin receptor	P43119	PI2R_HUMAN	PTGIR
P1	Resibufogenin	0.6122	DB01240	Prostacyclin receptor	P43119	PI2R_HUMAN	PTGIR
P1	Resibufogenin	0.6977	DB05087	Gamma-aminobutyric acid receptor subunit alpha-2	P47869	GBRA2_HUMAN	GABRA2
P1	Resibufogenin	0.6304	DB01708	Gamma-aminobutyric acid receptor subunit alpha-2	P47869	GBRA2_HUMAN	GABRA2
P1	Resibufogenin	0.6304	DB01708	Gamma-aminobutyric acid receptor subunit beta-2	P47870	GBRB2_HUMAN	GABRB2
P1	Resibufogenin	0.6977	DB05087	Gamma-aminobutyric acid receptor subunit alpha-4	P48169	GBRA4_HUMAN	GABRA4
P1	Resibufogenin	0.6304	DB01708	Gamma-aminobutyric acid receptor subunit alpha-4	P48169	GBRA4_HUMAN	GABRA4
P1	Resibufogenin	0.7333	DB02659	Gastrotropin	P51161	FABP6_HUMAN	FABP6
P1	Resibufogenin	0.64	DB01046	Chloride channel protein 2	P51788	CLCN2_HUMAN	CLCN2
P1	Resibufogenin	0.7143	DB07447	3-oxo-5-beta-steroid 4-dehydrogenase	P51857	AK1D1_HUMAN	AKR1D1
P1	Resibufogenin	0.7333	DB01586	Aldo-keto reductase family 1 member C2	P52895	AK1C2_HUMAN	AKR1C2
P1	Resibufogenin	0.6522	DB07768	Aldo-keto reductase family 1 member C2	P52895	AK1C2_HUMAN	AKR1C2
P1	Resibufogenin	0.7333	DB02659	Estrogen-related receptor gamma	P62508	ERR3_HUMAN	ESRRG
P1	Resibufogenin	0.6739	DB00163	Serine/threonine-protein phosphatase 2A catalytic subunit beta isoform	P62714	PP2AB_HUMAN	PPP2CB
P1	Resibufogenin	0.6346	DB02587	Guanine nucleotide-binding protein G(s) subunit alpha isoforms short	P63092	GNAS2_HUMAN	GNAS
P1	Resibufogenin	0.6739	DB00163	Serine/threonine-protein phosphatase 2A catalytic subunit alpha isoform	P67775	PP2AA_HUMAN	PPP2CA
P1	Resibufogenin	0.6102	DB03010	Tubulin alpha-1B chain	P68363	TBA1B_HUMAN	TUBA1B
P1	Resibufogenin	0.6102	DB03010	Tubulin alpha-4A chain	P68366	TBA4A_HUMAN	TUBA4A
P1	Resibufogenin	0.6102	DB03010	Tubulin beta-4B chain	P68371	TBB4B_HUMAN	TUBB4B
P1	Resibufogenin	0.6304	DB01708	Gamma-aminobutyric acid receptor subunit epsilon	P78334	GBRE_HUMAN	GABRE
P1	Resibufogenin	0.6591	DB07348	ADP-ribosylation factor 1	P84077	ARF1_HUMAN	ARF1
P1	Resibufogenin	0.7333	DB02659	Cytochrome c oxidase subunit 6A2, mitochondrial	Q02221	CX6A2_HUMAN	COX6A2
P1	Resibufogenin	0.64	DB00374	Peroxisome proliferator-activated receptor delta	Q03181	PPARD_HUMAN	PPARD
P1	Resibufogenin	0.6522	DB07768	Aldo-keto reductase family 1 member C1	Q04828	AK1C1_HUMAN	AKR1C1
P1	Resibufogenin	0.6304	DB01708	Glutamate receptor ionotropic, NMDA 1	Q05586	NMDZ1_HUMAN	GRIN1
P1	Resibufogenin	0.7143	DB02854	Bile salt sulfotransferase	Q06520	ST2A1_HUMAN	SULT2A1
P1	Resibufogenin	0.6304	DB01708	Bile salt sulfotransferase	Q06520	ST2A1_HUMAN	SULT2A1
P1	Resibufogenin	0.6042	DB03849	cAMP-specific 3',5'-cyclic phosphodiesterase 4B	Q07343	PDE4B_HUMAN	PDE4B
P1	Resibufogenin	0.6304	DB01708	Peroxisome proliferator-activated receptor alpha	Q07869	PPARA_HUMAN	PPARA
P1	Resibufogenin	0.6346	DB02587	Adenylate cyclase type 2	Q08462	ADCY2_HUMAN	ADCY2
P1	Resibufogenin	0.6042	DB03849	cAMP-specific 3',5'-cyclic phosphodiesterase 4D	Q08499	PDE4D_HUMAN	PDE4D
P1	Resibufogenin	0.6304	DB01708	Glutamate receptor ionotropic, NMDA 2A	Q12879	NMDE1_HUMAN	GRIN2A
P1	Resibufogenin	0.6304	DB01708	Glutamate receptor ionotropic, NMDA 2B	Q13224	NMDE2_HUMAN	GRIN2B
P1	Resibufogenin	0.6102	DB03010	Tubulin beta-3 chain	Q13509	TBB3_HUMAN	TUBB3
P1	Resibufogenin	0.6102	DB03010	Tubulin alpha-3C/D chain	Q13748	TBA3C_HUMAN	TUBA3C
P1	Resibufogenin	0.6304	DB01708	Glutamate receptor ionotropic, NMDA 2C	Q14957	NMDE3_HUMAN	GRIN2C
P1	Resibufogenin	0.6304	DB01708	Nuclear receptor subfamily 1 group I member 3	Q14994	NR1I3_HUMAN	NR1I3
P1	Resibufogenin	0.6279	DB01889	Nuclear receptor subfamily 1 group I member 3	Q14994	NR1I3_HUMAN	NR1I3
P1	Resibufogenin	0.7045	DB06871	Nuclear receptor coactivator 2	Q15596	NCOA2_HUMAN	NCOA2
P1	Resibufogenin	0.6596	DB07678	Nuclear receptor coactivator 2	Q15596	NCOA2_HUMAN	NCOA2
P1	Resibufogenin	0.6531	DB07087	Nuclear receptor coactivator 2	Q15596	NCOA2_HUMAN	NCOA2
P1	Resibufogenin	0.6522	DB02998	Nuclear receptor coactivator 2	Q15596	NCOA2_HUMAN	NCOA2
P1	Resibufogenin	0.64	DB07707	Nuclear receptor coactivator 2	Q15596	NCOA2_HUMAN	NCOA2
P1	Resibufogenin	0.6875	DB08220	Nuclear receptor coactivator 1	Q15788	NCOA1_HUMAN	NCOA1
P1	Resibufogenin	0.6977	DB05087	Gamma-aminobutyric acid receptor subunit alpha-6	Q16445	GBRA6_HUMAN	GABRA6
P1	Resibufogenin	0.6304	DB01708	Gamma-aminobutyric acid receptor subunit alpha-6	Q16445	GBRA6_HUMAN	GABRA6
P1	Resibufogenin	0.6122	DB01240	Prostacyclin synthase	Q16647	PTGIS_HUMAN	PTGIS
P1	Resibufogenin	0.6809	DB02342	Hypoxia-inducible factor 1-alpha	Q16665	HIF1A_HUMAN	HIF1A
P1	Resibufogenin	0.6809	DB02342	Cytochrome P450 1B1	Q16678	CP1B1_HUMAN	CYP1B1
P1	Resibufogenin	0.6471	DB07815	Arylacetamide deacetylase-like 2	Q6P093	ADCL2_HUMAN	AADACL2
P1	Resibufogenin	0.6078	DB07814	Arylacetamide deacetylase-like 2	Q6P093	ADCL2_HUMAN	AADACL2
P1	Resibufogenin	0.6102	DB03010	Tubulin alpha-1A chain	Q71U36	TBA1A_HUMAN	TUBA1A
P1	Resibufogenin	0.7333	DB02659	Ferrochelatase	Q7KZA3	Q7KZA3_HUMAN	DKFZp686P18130
P1	Resibufogenin	0.7333	DB07690	Elongation factor Tu GTP-binding domain-containing protein 1	Q7Z2Z2	ETUD1_HUMAN	EFTUD1
P1	Resibufogenin	0.6304	DB01708	Gamma-aminobutyric acid receptor subunit gamma-1	Q8N1C3	GBRG1_HUMAN	GABRG1
P1	Resibufogenin	0.7143	DB02854	Estradiol 17-beta-dehydrogenase 11	Q8NBQ5	DHB11_HUMAN	HSD17B11
P1	Resibufogenin	0.6304	DB01708	Glutamate receptor ionotropic, NMDA 3A	Q8TCU5	NMD3A_HUMAN	GRIN3A
P1	Resibufogenin	0.6818	DB00783	Estrogen receptor beta	Q92731	ESR2_HUMAN	ESR2
P1	Resibufogenin	0.6744	DB03882	Estrogen receptor beta	Q92731	ESR2_HUMAN	ESR2
P1	Resibufogenin	0.6739	DB04573	Estrogen receptor beta	Q92731	ESR2_HUMAN	ESR2
P1	Resibufogenin	0.6739	DB07702	Estrogen receptor beta	Q92731	ESR2_HUMAN	ESR2
P1	Resibufogenin	0.6538	DB01108	Estrogen receptor beta	Q92731	ESR2_HUMAN	ESR2
P1	Resibufogenin	0.6304	DB01708	Estrogen receptor beta	Q92731	ESR2_HUMAN	ESR2
P1	Resibufogenin	0.6154	DB00227	Histone deacetylase 2	Q92769	HDAC2_HUMAN	HDAC2
P1	Resibufogenin	0.7333	DB06777	Bile acid receptor	Q96RI1	NR1H4_HUMAN	NR1H4
P1	Resibufogenin	0.6875	DB08220	Bile acid receptor	Q96RI1	NR1H4_HUMAN	NR1H4
P1	Resibufogenin	0.6591	DB07348	Cytohesin-2	Q99418	CYH2_HUMAN	CYTH2
P1	Resibufogenin	0.6304	DB01708	Sigma non-opioid intracellular receptor 1	Q99720	SGMR1_HUMAN	SIGMAR1
P1	Resibufogenin	0.6304	DB01708	Gamma-aminobutyric acid receptor subunit gamma-3	Q99928	GBRG3_HUMAN	GABRG3
P1	Resibufogenin	0.6102	DB03010	Tubulin alpha-1C chain	Q9BQE3	TBA1C_HUMAN	TUBA1C
P1	Resibufogenin	0.64	DB00374	P2Y purinoceptor 12	Q9H244	P2Y12_HUMAN	P2RY12
P1	Resibufogenin	0.6122	DB01240	P2Y purinoceptor 12	Q9H244	P2Y12_HUMAN	P2RY12
P1	Resibufogenin	0.6102	DB03010	Tubulin beta-1 chain	Q9H4B7	TBB1_HUMAN	TUBB1
P1	Resibufogenin	0.6739	DB07702	Nuclear receptor coactivator 5	Q9HCD5	NCOA5_HUMAN	NCOA5
P1	Resibufogenin	0.6102	DB03010	Tubulin alpha-8 chain	Q9NY65	TBA8_HUMAN	TUBA8
P1	Resibufogenin	0.6739	DB00163	SEC14-like protein 4	Q9UDX3	S14L4_HUMAN	SEC14L4
P1	Resibufogenin	0.6739	DB00163	SEC14-like protein 3	Q9UDX4	S14L3_HUMAN	SEC14L3
P1	Resibufogenin	0.6304	DB01708	Gamma-aminobutyric acid receptor subunit theta	Q9UN88	GBRT_HUMAN	GABRQ
P2	Bufalin	0.6591	DB01708	Sulfotransferase family cytosolic 2B member 1	O00204	ST2B1_HUMAN	SULT2B1
P2	Bufalin	0.6444	DB02789	Sulfotransferase family cytosolic 2B member 1	O00204	ST2B1_HUMAN	SULT2B1
P2	Bufalin	0.6	DB00421	Voltage-dependent L-type calcium channel subunit beta-4	O00305	CACB4_HUMAN	CACNB4
P2	Bufalin	0.6	DB00421	Voltage-dependent P/Q-type calcium channel subunit alpha-1A	O00555	CAC1A_HUMAN	CACNA1A
P2	Bufalin	0.6591	DB01708	Gamma-aminobutyric acid receptor subunit pi	O00591	GBRP_HUMAN	GABRP
P2	Bufalin	0.6458	DB02859	Acetyl-CoA carboxylase 2	O00763	ACACB_HUMAN	ACACB
P2	Bufalin	0.6122	DB02205	Glyceraldehyde-3-phosphate dehydrogenase, testis-specific	O14556	G3PT_HUMAN	GAPDHS
P2	Bufalin	0.6591	DB01708	Gamma-aminobutyric acid receptor subunit delta	O14764	GBRD_HUMAN	GABRD
P2	Bufalin	0.6591	DB01708	Glutamate receptor ionotropic, NMDA 2D	O15399	NMDE4_HUMAN	GRIN2D
P2	Bufalin	0.6	DB00421	Voltage-dependent T-type calcium channel subunit alpha-1G	O43497	CAC1G_HUMAN	CACNA1G
P2	Bufalin	0.6591	DB01708	Glutamate receptor ionotropic, NMDA 3B	O60391	NMD3B_HUMAN	GRIN3B
P2	Bufalin	0.6	DB00421	Voltage-dependent L-type calcium channel subunit alpha-1F	O60840	CAC1F_HUMAN	CACNA1F
P2	Bufalin	0.6102	DB00602	Glycine receptor subunit alpha-3	O75311	GLRA3_HUMAN	GLRA3
P2	Bufalin	0.7561	DB00783	Nuclear receptor subfamily 1 group I member 2	O75469	NR1I2_HUMAN	NR1I2
P2	Bufalin	0.7381	DB00977	Nuclear receptor subfamily 1 group I member 2	O75469	NR1I2_HUMAN	NR1I2
P2	Bufalin	0.7045	DB00163	Nuclear receptor subfamily 1 group I member 2	O75469	NR1I2_HUMAN	NR1I2
P2	Bufalin	0.6591	DB01708	Nuclear receptor subfamily 1 group I member 2	O75469	NR1I2_HUMAN	NR1I2
P2	Bufalin	0.6042	DB01892	Nuclear receptor subfamily 1 group I member 2	O75469	NR1I2_HUMAN	NR1I2
P2	Bufalin	0.7045	DB00163	SEC14-like protein 2	O76054	S14L2_HUMAN	SEC14L2
P2	Bufalin	0.6	DB00421	Voltage-dependent T-type calcium channel subunit alpha-1H	O95180	CAC1H_HUMAN	CACNA1H
P2	Bufalin	0.6939	DB02587	Adenylate cyclase type 5	O95622	ADCY5_HUMAN	ADCY5
P2	Bufalin	0.8095	DB02659	Alcohol dehydrogenase 1C	P00326	ADH1G_HUMAN	ADH1C
P2	Bufalin	0.6304	DB07714	Glutathione reductase, mitochondrial	P00390	GSHR_HUMAN	GSR
P2	Bufalin	0.6279	DB01644	Glutathione reductase, mitochondrial	P00390	GSHR_HUMAN	GSR
P2	Bufalin	0.8095	DB02659	Cytochrome c oxidase subunit 1	P00395	COX1_HUMAN	MT-CO1
P2	Bufalin	0.8095	DB02659	Cytochrome c oxidase subunit 2	P00403	COX2_HUMAN	MT-CO2
P2	Bufalin	0.8095	DB02659	Cytochrome c oxidase subunit 3	P00414	COX3_HUMAN	MT-CO3
P2	Bufalin	0.62	DB01088	Tissue-type plasminogen activator	P00750	TPA_HUMAN	PLAT
P2	Bufalin	0.6098	DB07375	Ig kappa chain C region	P01834	IGKC_HUMAN	IGKC
P2	Bufalin	0.6098	DB07375	Ig gamma-1 chain C region	P01857	IGHG1_HUMAN	IGHG1
P2	Bufalin	0.75	DB02854	Ig gamma-2 chain C region	P01859	IGHG2_HUMAN	IGHG2
P2	Bufalin	0.7273	DB08510	Ig gamma-2 chain C region	P01859	IGHG2_HUMAN	IGHG2
P2	Bufalin	0.6667	DB08547	Ig gamma-2 chain C region	P01859	IGHG2_HUMAN	IGHG2
P2	Bufalin	0.6098	DB07375	Ig gamma-2 chain C region	P01859	IGHG2_HUMAN	IGHG2
P2	Bufalin	0.6	DB00497	Alpha-1-acid glycoprotein 1	P02763	A1AG1_HUMAN	ORM1
P2	Bufalin	0.7805	DB06871	Estrogen receptor	P03372	ESR1_HUMAN	ESR1
P2	Bufalin	0.7561	DB00783	Estrogen receptor	P03372	ESR1_HUMAN	ESR1
P2	Bufalin	0.7442	DB04573	Estrogen receptor	P03372	ESR1_HUMAN	ESR1
P2	Bufalin	0.7381	DB00977	Estrogen receptor	P03372	ESR1_HUMAN	ESR1
P2	Bufalin	0.7273	DB07678	Estrogen receptor	P03372	ESR1_HUMAN	ESR1
P2	Bufalin	0.7174	DB07087	Estrogen receptor	P03372	ESR1_HUMAN	ESR1
P2	Bufalin	0.7073	DB00655	Estrogen receptor	P03372	ESR1_HUMAN	ESR1
P2	Bufalin	0.7045	DB01357	Estrogen receptor	P03372	ESR1_HUMAN	ESR1
P2	Bufalin	0.7021	DB07707	Estrogen receptor	P03372	ESR1_HUMAN	ESR1
P2	Bufalin	0.6977	DB04575	Estrogen receptor	P03372	ESR1_HUMAN	ESR1
P2	Bufalin	0.6591	DB01708	Estrogen receptor	P03372	ESR1_HUMAN	ESR1
P2	Bufalin	0.6531	DB01185	Estrogen receptor	P03372	ESR1_HUMAN	ESR1
P2	Bufalin	0.6471	DB01108	Estrogen receptor	P03372	ESR1_HUMAN	ESR1
P2	Bufalin	0.6042	DB00603	Estrogen receptor	P03372	ESR1_HUMAN	ESR1
P2	Bufalin	0.6042	DB00823	Estrogen receptor	P03372	ESR1_HUMAN	ESR1
P2	Bufalin	0.6667	DB00641	3-hydroxy-3-methylglutaryl-coenzyme A reductase	P04035	HMDH_HUMAN	HMGCR
P2	Bufalin	0.64	DB00227	3-hydroxy-3-methylglutaryl-coenzyme A reductase	P04035	HMDH_HUMAN	HMGCR
P2	Bufalin	0.6078	DB00175	3-hydroxy-3-methylglutaryl-coenzyme A reductase	P04035	HMDH_HUMAN	HMGCR
P2	Bufalin	0.6078	DB06693	3-hydroxy-3-methylglutaryl-coenzyme A reductase	P04035	HMDH_HUMAN	HMGCR
P2	Bufalin	0.8095	DB02659	Phospholipase A2	P04054	PA21B_HUMAN	PLA2G1B
P2	Bufalin	0.6346	DB00741	Annexin A1	P04083	ANXA1_HUMAN	ANXA1
P2	Bufalin	0.6531	DB01185	Glucocorticoid receptor	P04150	GCR_HUMAN	NR3C1
P2	Bufalin	0.6522	DB00253	Glucocorticoid receptor	P04150	GCR_HUMAN	NR3C1
P2	Bufalin	0.6471	DB00324	Glucocorticoid receptor	P04150	GCR_HUMAN	NR3C1
P2	Bufalin	0.6415	DB00873	Glucocorticoid receptor	P04150	GCR_HUMAN	NR3C1
P2	Bufalin	0.6364	DB01410	Glucocorticoid receptor	P04150	GCR_HUMAN	NR3C1
P2	Bufalin	0.6364	DB01260	Glucocorticoid receptor	P04150	GCR_HUMAN	NR3C1
P2	Bufalin	0.6364	DB01222	Glucocorticoid receptor	P04150	GCR_HUMAN	NR3C1
P2	Bufalin	0.6346	DB01380	Glucocorticoid receptor	P04150	GCR_HUMAN	NR3C1
P2	Bufalin	0.6346	DB00860	Glucocorticoid receptor	P04150	GCR_HUMAN	NR3C1
P2	Bufalin	0.6346	DB00741	Glucocorticoid receptor	P04150	GCR_HUMAN	NR3C1
P2	Bufalin	0.6346	DB00635	Glucocorticoid receptor	P04150	GCR_HUMAN	NR3C1
P2	Bufalin	0.625	DB00896	Glucocorticoid receptor	P04150	GCR_HUMAN	NR3C1
P2	Bufalin	0.6226	DB00959	Glucocorticoid receptor	P04150	GCR_HUMAN	NR3C1
P2	Bufalin	0.6226	DB00764	Glucocorticoid receptor	P04150	GCR_HUMAN	NR3C1
P2	Bufalin	0.6042	DB00351	Glucocorticoid receptor	P04150	GCR_HUMAN	NR3C1
P2	Bufalin	0.6	DB00421	Glucocorticoid receptor	P04150	GCR_HUMAN	NR3C1
P2	Bufalin	0.6	DB00421	Sex hormone-binding globulin	P04278	SHBG_HUMAN	SHBG
P2	Bufalin	0.75	DB02342	Cytochrome P450 1A1	P04798	CP1A1_HUMAN	CYP1A1
P2	Bufalin	0.7308	DB00511	Sodium/potassium-transporting ATPase subunit alpha-1	P05023	AT1A1_HUMAN	ATP1A1
P2	Bufalin	0.7308	DB01396	Sodium/potassium-transporting ATPase subunit alpha-1	P05023	AT1A1_HUMAN	ATP1A1
P2	Bufalin	0.717	DB00390	Sodium/potassium-transporting ATPase subunit alpha-1	P05023	AT1A1_HUMAN	ATP1A1
P2	Bufalin	0.6909	DB01092	Sodium/potassium-transporting ATPase subunit alpha-1	P05023	AT1A1_HUMAN	ATP1A1
P2	Bufalin	0.6786	DB01078	Sodium/potassium-transporting ATPase subunit alpha-1	P05023	AT1A1_HUMAN	ATP1A1
P2	Bufalin	0.6596	DB05812	Steroid 17-alpha-hydroxylase/17,20 lyase	P05093	CP17A_HUMAN	CYP17A1
P2	Bufalin	0.6667	DB00641	Integrin beta-2	P05107	ITB2_HUMAN	ITGB2
P2	Bufalin	0.7045	DB00163	Protein kinase C beta type	P05771	KPCB_HUMAN	PRKCB
P2	Bufalin	0.6818	DB02998	Progesterone receptor	P06401	PRGR_HUMAN	PGR
P2	Bufalin	0.6444	DB00717	Progesterone receptor	P06401	PRGR_HUMAN	PGR
P2	Bufalin	0.6042	DB00603	Progesterone receptor	P06401	PRGR_HUMAN	PGR
P2	Bufalin	0.6042	DB00351	Progesterone receptor	P06401	PRGR_HUMAN	PGR
P2	Bufalin	0.6042	DB00823	Progesterone receptor	P06401	PRGR_HUMAN	PGR
P2	Bufalin	0.6042	DB01395	Progesterone receptor	P06401	PRGR_HUMAN	PGR
P2	Bufalin	0.6	DB00421	Progesterone receptor	P06401	PRGR_HUMAN	PGR
P2	Bufalin	0.6522	DB07908	Profilin-1	P07737	PROF1_HUMAN	PFN1
P2	Bufalin	0.64	DB04652	Mineralocorticoid receptor	P08235	MCR_HUMAN	NR3C2
P2	Bufalin	0.62	DB04630	Mineralocorticoid receptor	P08235	MCR_HUMAN	NR3C2
P2	Bufalin	0.6042	DB01395	Mineralocorticoid receptor	P08235	MCR_HUMAN	NR3C2
P2	Bufalin	0.6	DB00421	Mineralocorticoid receptor	P08235	MCR_HUMAN	NR3C2
P2	Bufalin	0.8095	DB02659	Cytochrome c oxidase subunit 6C	P09669	COX6C_HUMAN	COX6C
P2	Bufalin	0.7045	DB00163	Arachidonate 5-lipoxygenase	P09917	LOX5_HUMAN	ALOX5
P2	Bufalin	0.6042	DB01892	Arachidonate 5-lipoxygenase	P09917	LOX5_HUMAN	ALOX5
P2	Bufalin	0.8095	DB02659	Cytochrome c oxidase subunit 8A, mitochondrial	P10176	COX8A_HUMAN	COX8A
P2	Bufalin	0.814	DB00621	Androgen receptor	P10275	ANDR_HUMAN	AR
P2	Bufalin	0.75	DB02901	Androgen receptor	P10275	ANDR_HUMAN	AR
P2	Bufalin	0.7317	DB01481	Androgen receptor	P10275	ANDR_HUMAN	AR
P2	Bufalin	0.7317	DB00858	Androgen receptor	P10275	ANDR_HUMAN	AR
P2	Bufalin	0.6818	DB01541	Androgen receptor	P10275	ANDR_HUMAN	AR
P2	Bufalin	0.6818	DB00624	Androgen receptor	P10275	ANDR_HUMAN	AR
P2	Bufalin	0.6818	DB02998	Androgen receptor	P10275	ANDR_HUMAN	AR
P2	Bufalin	0.6667	DB06710	Androgen receptor	P10275	ANDR_HUMAN	AR
P2	Bufalin	0.6667	DB01564	Androgen receptor	P10275	ANDR_HUMAN	AR
P2	Bufalin	0.6531	DB01185	Androgen receptor	P10275	ANDR_HUMAN	AR
P2	Bufalin	0.6304	DB06870	Androgen receptor	P10275	ANDR_HUMAN	AR
P2	Bufalin	0.62	DB07717	Androgen receptor	P10275	ANDR_HUMAN	AR
P2	Bufalin	0.6042	DB01395	Androgen receptor	P10275	ANDR_HUMAN	AR
P2	Bufalin	0.6	DB00421	Androgen receptor	P10275	ANDR_HUMAN	AR
P2	Bufalin	0.8095	DB02659	Cytochrome c oxidase subunit 5B, mitochondrial	P10606	COX5B_HUMAN	COX5B
P2	Bufalin	0.6182	DB01177	DNA topoisomerase 2-alpha	P11388	TOP2A_HUMAN	TOP2A
P2	Bufalin	0.6818	DB05107	Glucose-6-phosphate 1-dehydrogenase	P11413	G6PD_HUMAN	G6PD
P2	Bufalin	0.6596	DB02300	Vitamin D3 receptor	P11473	VDR_HUMAN	VDR
P2	Bufalin	0.6383	DB00910	Vitamin D3 receptor	P11473	VDR_HUMAN	VDR
P2	Bufalin	0.6383	DB00146	Vitamin D3 receptor	P11473	VDR_HUMAN	VDR
P2	Bufalin	0.6327	DB00136	Vitamin D3 receptor	P11473	VDR_HUMAN	VDR
P2	Bufalin	0.6154	DB03451	Vitamin D3 receptor	P11473	VDR_HUMAN	VDR
P2	Bufalin	0.6122	DB08742	Vitamin D3 receptor	P11473	VDR_HUMAN	VDR
P2	Bufalin	0.6122	DB04258	Vitamin D3 receptor	P11473	VDR_HUMAN	VDR
P2	Bufalin	0.6	DB01070	Vitamin D3 receptor	P11473	VDR_HUMAN	VDR
P2	Bufalin	0.6	DB04796	Vitamin D3 receptor	P11473	VDR_HUMAN	VDR
P2	Bufalin	0.75	DB02342	Aromatase	P11511	CP19A_HUMAN	CYP19A1
P2	Bufalin	0.6444	DB00894	Aromatase	P11511	CP19A_HUMAN	CYP19A1
P2	Bufalin	0.6604	DB01024	Inosine-5'-monophosphate dehydrogenase 2	P12268	IMDH2_HUMAN	IMPDH2
P2	Bufalin	0.8095	DB02659	Cytochrome c oxidase subunit 4 isoform 1, mitochondrial	P13073	COX41_HUMAN	COX4I1
P2	Bufalin	0.6471	DB01108	3 beta-hydroxysteroid dehydrogenase/Delta 5-->4-isomerase type 1	P14060	3BHS1_HUMAN	HSD3B1
P2	Bufalin	0.75	DB02901	Estradiol 17-beta-dehydrogenase 1	P14061	DHB1_HUMAN	HSD17B1
P2	Bufalin	0.6591	DB01708	Estradiol 17-beta-dehydrogenase 1	P14061	DHB1_HUMAN	HSD17B1
P2	Bufalin	0.6444	DB02187	Estradiol 17-beta-dehydrogenase 1	P14061	DHB1_HUMAN	HSD17B1
P2	Bufalin	0.6098	DB01561	Estradiol 17-beta-dehydrogenase 1	P14061	DHB1_HUMAN	HSD17B1
P2	Bufalin	0.8095	DB02659	Cytochrome c oxidase subunit 6B1	P14854	CX6B1_HUMAN	COX6B1
P2	Bufalin	0.7317	DB05087	Gamma-aminobutyric acid receptor subunit alpha-1	P14867	GBRA1_HUMAN	GABRA1
P2	Bufalin	0.6591	DB01708	Gamma-aminobutyric acid receptor subunit alpha-1	P14867	GBRA1_HUMAN	GABRA1
P2	Bufalin	0.8095	DB02659	Cytochrome c oxidase subunit 7C, mitochondrial	P15954	COX7C_HUMAN	COX7C
P2	Bufalin	0.6531	DB01185	Prolactin receptor	P16471	PRLR_HUMAN	PRLR
P2	Bufalin	0.7045	DB00163	Protein kinase C alpha type	P17252	KPCA_HUMAN	PRKCA
P2	Bufalin	0.6	DB00421	3-oxo-5-alpha-steroid 4-dehydrogenase 1	P18405	S5A1_HUMAN	SRD5A1
P2	Bufalin	0.6591	DB01708	Gamma-aminobutyric acid receptor subunit beta-1	P18505	GBRB1_HUMAN	GABRB1
P2	Bufalin	0.6591	DB01708	Gamma-aminobutyric acid receptor subunit gamma-2	P18507	GBRG2_HUMAN	GABRG2
P2	Bufalin	0.6	DB00421	Cytochrome P450 11B2, mitochondrial	P19099	C11B2_HUMAN	CYP11B2
P2	Bufalin	0.6	DB00497	Alpha-1-acid glycoprotein 2	P19652	A1AG2_HUMAN	ORM2
P2	Bufalin	0.6111	DB00749	Retinoic acid receptor RXR-alpha	P19793	RXRA_HUMAN	RXRA
P2	Bufalin	0.8095	DB02659	Cytochrome c oxidase subunit 5A, mitochondrial	P20674	COX5A_HUMAN	COX5A
P2	Bufalin	0.64	DB00227	Integrin alpha-L	P20701	ITAL_HUMAN	ITGAL
P2	Bufalin	0.6604	DB01024	Inosine-5'-monophosphate dehydrogenase 1	P20839	IMDH1_HUMAN	IMPDH1
P2	Bufalin	0.6957	DB00486	Cannabinoid receptor 1	P21554	CNR1_HUMAN	CNR1
P2	Bufalin	0.75	DB02342	Catechol O-methyltransferase	P21964	COMT_HUMAN	COMT
P2	Bufalin	0.8095	DB02659	Ferrochelatase, mitochondrial	P22830	HEMH_HUMAN	FECH
P2	Bufalin	0.8095	DB02659	Liver carboxylesterase 1	P23141	EST1_HUMAN	CES1
P2	Bufalin	0.6957	DB08224	Liver carboxylesterase 1	P23141	EST1_HUMAN	CES1
P2	Bufalin	0.6111	DB00749	Prostaglandin G/H synthase 1	P23219	PGH1_HUMAN	PTGS1
P2	Bufalin	0.6042	DB01892	Prostaglandin G/H synthase 1	P23219	PGH1_HUMAN	PTGS1
P2	Bufalin	0.7045	DB00163	Diacylglycerol kinase alpha	P23743	DGKA_HUMAN	DGKA
P2	Bufalin	0.8095	DB02659	Cytochrome c oxidase subunit 7A1, mitochondrial	P24310	CX7A1_HUMAN	COX7A1
P2	Bufalin	0.8095	DB02659	Cytochrome c oxidase subunit 7B, mitochondrial	P24311	COX7B_HUMAN	COX7B
P2	Bufalin	0.6471	DB01108	3 beta-hydroxysteroid dehydrogenase/Delta 5-->4-isomerase type 2	P26439	3BHS2_HUMAN	HSD3B2
P2	Bufalin	0.62	DB01088	cAMP-specific 3',5'-cyclic phosphodiesterase 4A	P27815	PDE4A_HUMAN	PDE4A
P2	Bufalin	0.6591	DB01708	Gamma-aminobutyric acid receptor subunit beta-3	P28472	GBRB3_HUMAN	GABRB3
P2	Bufalin	0.6102	DB00602	Gamma-aminobutyric acid receptor subunit beta-3	P28472	GBRB3_HUMAN	GABRB3
P2	Bufalin	0.6735	DB02329	Corticosteroid 11-beta-dehydrogenase isozyme 1	P28845	DHI1_HUMAN	HSD11B1
P2	Bufalin	0.64	DB04652	Corticosteroid 11-beta-dehydrogenase isozyme 1	P28845	DHI1_HUMAN	HSD11B1
P2	Bufalin	0.6346	DB00635	Corticosteroid 11-beta-dehydrogenase isozyme 1	P28845	DHI1_HUMAN	HSD11B1
P2	Bufalin	0.6	DB00421	3-oxo-5-alpha-steroid 4-dehydrogenase 2	P31213	S5A2_HUMAN	SRD5A2
P2	Bufalin	0.7317	DB05087	Gamma-aminobutyric acid receptor subunit alpha-5	P31644	GBRA5_HUMAN	GABRA5
P2	Bufalin	0.6591	DB01708	Gamma-aminobutyric acid receptor subunit alpha-5	P31644	GBRA5_HUMAN	GABRA5
P2	Bufalin	0.6327	DB05314	Cytidine deaminase	P32320	CDD_HUMAN	CDA
P2	Bufalin	0.7317	DB05087	Gamma-aminobutyric acid receptor subunit alpha-3	P34903	GBRA3_HUMAN	GABRA3
P2	Bufalin	0.6591	DB01708	Gamma-aminobutyric acid receptor subunit alpha-3	P34903	GBRA3_HUMAN	GABRA3
P2	Bufalin	0.6957	DB00486	Cannabinoid receptor 2	P34972	CNR2_HUMAN	CNR2
P2	Bufalin	0.62	DB01088	Prostaglandin E2 receptor EP1 subtype	P34995	PE2R1_HUMAN	PTGER1
P2	Bufalin	0.6	DB00770	Prostaglandin E2 receptor EP1 subtype	P34995	PE2R1_HUMAN	PTGER1
P2	Bufalin	0.6	DB00917	Prostaglandin E2 receptor EP1 subtype	P34995	PE2R1_HUMAN	PTGER1
P2	Bufalin	0.6111	DB00749	Prostaglandin G/H synthase 2	P35354	PGH2_HUMAN	PTGS2
P2	Bufalin	0.6102	DB01192	Mu-type opioid receptor	P35372	OPRM_HUMAN	OPRM1
P2	Bufalin	0.6	DB00497	Mu-type opioid receptor	P35372	OPRM_HUMAN	OPRM1
P2	Bufalin	0.625	DB00929	Prostaglandin E2 receptor EP4 subtype	P35408	PE2R4_HUMAN	PTGER4
P2	Bufalin	0.6	DB00917	Prostaglandin E2 receptor EP4 subtype	P35408	PE2R4_HUMAN	PTGER4
P2	Bufalin	0.6981	DB02169	Serine/threonine-protein phosphatase PP1-gamma catalytic subunit	P36873	PP1G_HUMAN	PPP1CC
P2	Bufalin	0.6102	DB01192	Delta-type opioid receptor	P41143	OPRD_HUMAN	OPRD1
P2	Bufalin	0.6	DB00497	Delta-type opioid receptor	P41143	OPRD_HUMAN	OPRD1
P2	Bufalin	0.6	DB00497	Kappa-type opioid receptor	P41145	OPRK_HUMAN	OPRK1
P2	Bufalin	0.6154	DB07700	Aldo-keto reductase family 1 member C3	P42330	AK1C3_HUMAN	AKR1C3
P2	Bufalin	0.6	DB02056	Aldo-keto reductase family 1 member C3	P42330	AK1C3_HUMAN	AKR1C3
P2	Bufalin	0.6087	DB00654	Prostaglandin F2-alpha receptor	P43088	PF2R_HUMAN	PTGFR
P2	Bufalin	0.625	DB00929	Prostaglandin E2 receptor EP3 subtype	P43115	PE2R3_HUMAN	PTGER3
P2	Bufalin	0.6	DB00917	Prostaglandin E2 receptor EP3 subtype	P43115	PE2R3_HUMAN	PTGER3
P2	Bufalin	0.625	DB00929	Prostaglandin E2 receptor EP2 subtype	P43116	PE2R2_HUMAN	PTGER2
P2	Bufalin	0.6	DB00770	Prostaglandin E2 receptor EP2 subtype	P43116	PE2R2_HUMAN	PTGER2
P2	Bufalin	0.6	DB00917	Prostaglandin E2 receptor EP2 subtype	P43116	PE2R2_HUMAN	PTGER2
P2	Bufalin	0.7021	DB00374	Prostacyclin receptor	P43119	PI2R_HUMAN	PTGIR
P2	Bufalin	0.6739	DB01240	Prostacyclin receptor	P43119	PI2R_HUMAN	PTGIR
P2	Bufalin	0.6458	DB05229	Prostacyclin receptor	P43119	PI2R_HUMAN	PTGIR
P2	Bufalin	0.62	DB01088	Prostacyclin receptor	P43119	PI2R_HUMAN	PTGIR
P2	Bufalin	0.7317	DB05087	Gamma-aminobutyric acid receptor subunit alpha-2	P47869	GBRA2_HUMAN	GABRA2
P2	Bufalin	0.6591	DB01708	Gamma-aminobutyric acid receptor subunit alpha-2	P47869	GBRA2_HUMAN	GABRA2
P2	Bufalin	0.6591	DB01708	Gamma-aminobutyric acid receptor subunit beta-2	P47870	GBRB2_HUMAN	GABRB2
P2	Bufalin	0.7317	DB05087	Gamma-aminobutyric acid receptor subunit alpha-4	P48169	GBRA4_HUMAN	GABRA4
P2	Bufalin	0.6591	DB01708	Gamma-aminobutyric acid receptor subunit alpha-4	P48169	GBRA4_HUMAN	GABRA4
P2	Bufalin	0.8095	DB02659	Gastrotropin	P51161	FABP6_HUMAN	FABP6
P2	Bufalin	0.6071	DB02691	Gastrotropin	P51161	FABP6_HUMAN	FABP6
P2	Bufalin	0.7021	DB01046	Chloride channel protein 2	P51788	CLCN2_HUMAN	CLCN2
P2	Bufalin	0.75	DB07447	3-oxo-5-beta-steroid 4-dehydrogenase	P51857	AK1D1_HUMAN	AKR1D1
P2	Bufalin	0.8095	DB01586	Aldo-keto reductase family 1 member C2	P52895	AK1C2_HUMAN	AKR1C2
P2	Bufalin	0.6818	DB07768	Aldo-keto reductase family 1 member C2	P52895	AK1C2_HUMAN	AKR1C2
P2	Bufalin	0.6	DB00421	Voltage-dependent L-type calcium channel subunit beta-3	P54284	CACB3_HUMAN	CACNB3
P2	Bufalin	0.6	DB00421	Voltage-dependent calcium channel subunit alpha-2/delta-1	P54289	CA2D1_HUMAN	CACNA2D1
P2	Bufalin	0.6207	DB01780	14-3-3 protein epsilon	P62258	1433E_HUMAN	YWHAE
P2	Bufalin	0.8095	DB02659	Estrogen-related receptor gamma	P62508	ERR3_HUMAN	ESRRG
P2	Bufalin	0.7045	DB00163	Serine/threonine-protein phosphatase 2A catalytic subunit beta isoform	P62714	PP2AB_HUMAN	PPP2CB
P2	Bufalin	0.6939	DB02587	Guanine nucleotide-binding protein G(s) subunit alpha isoforms short	P63092	GNAS2_HUMAN	GNAS
P2	Bufalin	0.7045	DB00163	Serine/threonine-protein phosphatase 2A catalytic subunit alpha isoform	P67775	PP2AA_HUMAN	PPP2CA
P2	Bufalin	0.6591	DB01708	Gamma-aminobutyric acid receptor subunit epsilon	P78334	GBRE_HUMAN	GABRE
P2	Bufalin	0.7317	DB07348	ADP-ribosylation factor 1	P84077	ARF1_HUMAN	ARF1
P2	Bufalin	0.6	DB00421	Voltage-dependent N-type calcium channel subunit alpha-1B	Q00975	CAC1B_HUMAN	CACNA1B
P2	Bufalin	0.6	DB00421	Voltage-dependent L-type calcium channel subunit alpha-1D	Q01668	CAC1D_HUMAN	CACNA1D
P2	Bufalin	0.8095	DB02659	Cytochrome c oxidase subunit 6A2, mitochondrial	Q02221	CX6A2_HUMAN	COX6A2
P2	Bufalin	0.6	DB00421	Voltage-dependent L-type calcium channel subunit beta-1	Q02641	CACB1_HUMAN	CACNB1
P2	Bufalin	0.7021	DB00374	Peroxisome proliferator-activated receptor delta	Q03181	PPARD_HUMAN	PPARD
P2	Bufalin	0.6818	DB07768	Aldo-keto reductase family 1 member C1	Q04828	AK1C1_HUMAN	AKR1C1
P2	Bufalin	0.6591	DB01708	Glutamate receptor ionotropic, NMDA 1	Q05586	NMDZ1_HUMAN	GRIN1
P2	Bufalin	0.6	DB00421	Voltage-dependent calcium channel gamma-1 subunit	Q06432	CCG1_HUMAN	CACNG1
P2	Bufalin	0.75	DB02854	Bile salt sulfotransferase	Q06520	ST2A1_HUMAN	SULT2A1
P2	Bufalin	0.6591	DB01708	Bile salt sulfotransferase	Q06520	ST2A1_HUMAN	SULT2A1
P2	Bufalin	0.6304	DB03849	cAMP-specific 3',5'-cyclic phosphodiesterase 4B	Q07343	PDE4B_HUMAN	PDE4B
P2	Bufalin	0.62	DB01088	cAMP-specific 3',5'-cyclic phosphodiesterase 4B	Q07343	PDE4B_HUMAN	PDE4B
P2	Bufalin	0.6591	DB01708	Peroxisome proliferator-activated receptor alpha	Q07869	PPARA_HUMAN	PPARA
P2	Bufalin	0.6	DB00421	Voltage-dependent L-type calcium channel subunit beta-2	Q08289	CACB2_HUMAN	CACNB2
P2	Bufalin	0.6939	DB02587	Adenylate cyclase type 2	Q08462	ADCY2_HUMAN	ADCY2
P2	Bufalin	0.62	DB01088	cAMP-specific 3',5'-cyclic phosphodiesterase 4C	Q08493	PDE4C_HUMAN	PDE4C
P2	Bufalin	0.6304	DB03849	cAMP-specific 3',5'-cyclic phosphodiesterase 4D	Q08499	PDE4D_HUMAN	PDE4D
P2	Bufalin	0.62	DB01088	cAMP-specific 3',5'-cyclic phosphodiesterase 4D	Q08499	PDE4D_HUMAN	PDE4D
P2	Bufalin	0.6591	DB01708	Glutamate receptor ionotropic, NMDA 2A	Q12879	NMDE1_HUMAN	GRIN2A
P2	Bufalin	0.6591	DB01708	Glutamate receptor ionotropic, NMDA 2B	Q13224	NMDE2_HUMAN	GRIN2B
P2	Bufalin	0.6	DB00421	Voltage-dependent L-type calcium channel subunit alpha-1S	Q13698	CAC1S_HUMAN	CACNA1S
P2	Bufalin	0.6	DB00421	Voltage-dependent L-type calcium channel subunit alpha-1C	Q13936	CAC1C_HUMAN	CACNA1C
P2	Bufalin	0.6	DB07177	Prostaglandin reductase 1	Q14914	PTGR1_HUMAN	PTGR1
P2	Bufalin	0.6591	DB01708	Glutamate receptor ionotropic, NMDA 2C	Q14957	NMDE3_HUMAN	GRIN2C
P2	Bufalin	0.6591	DB01708	Nuclear receptor subfamily 1 group I member 3	Q14994	NR1I3_HUMAN	NR1I3
P2	Bufalin	0.6585	DB01889	Nuclear receptor subfamily 1 group I member 3	Q14994	NR1I3_HUMAN	NR1I3
P2	Bufalin	0.7805	DB06871	Nuclear receptor coactivator 2	Q15596	NCOA2_HUMAN	NCOA2
P2	Bufalin	0.7273	DB07678	Nuclear receptor coactivator 2	Q15596	NCOA2_HUMAN	NCOA2
P2	Bufalin	0.7174	DB07087	Nuclear receptor coactivator 2	Q15596	NCOA2_HUMAN	NCOA2
P2	Bufalin	0.7021	DB07707	Nuclear receptor coactivator 2	Q15596	NCOA2_HUMAN	NCOA2
P2	Bufalin	0.6818	DB02998	Nuclear receptor coactivator 2	Q15596	NCOA2_HUMAN	NCOA2
P2	Bufalin	0.7556	DB08220	Nuclear receptor coactivator 1	Q15788	NCOA1_HUMAN	NCOA1
P2	Bufalin	0.64	DB04652	Nuclear receptor coactivator 1	Q15788	NCOA1_HUMAN	NCOA1
P2	Bufalin	0.6122	DB08742	Nuclear receptor coactivator 1	Q15788	NCOA1_HUMAN	NCOA1
P2	Bufalin	0.7317	DB05087	Gamma-aminobutyric acid receptor subunit alpha-6	Q16445	GBRA6_HUMAN	GABRA6
P2	Bufalin	0.6591	DB01708	Gamma-aminobutyric acid receptor subunit alpha-6	Q16445	GBRA6_HUMAN	GABRA6
P2	Bufalin	0.6739	DB01240	Prostacyclin synthase	Q16647	PTGIS_HUMAN	PTGIS
P2	Bufalin	0.75	DB02342	Hypoxia-inducible factor 1-alpha	Q16665	HIF1A_HUMAN	HIF1A
P2	Bufalin	0.75	DB02342	Cytochrome P450 1B1	Q16678	CP1B1_HUMAN	CYP1B1
P2	Bufalin	0.7083	DB07815	Arylacetamide deacetylase-like 2	Q6P093	ADCL2_HUMAN	AADACL2
P2	Bufalin	0.6667	DB07814	Arylacetamide deacetylase-like 2	Q6P093	ADCL2_HUMAN	AADACL2
P2	Bufalin	0.6	DB00421	Voltage-dependent L-type calcium channel subunit beta-1	Q6TME4	Q6TME4_HUMAN	CACNB1
P2	Bufalin	0.8095	DB02659	Ferrochelatase	Q7KZA3	Q7KZA3_HUMAN	DKFZp686P18130
P2	Bufalin	0.8095	DB07690	Elongation factor Tu GTP-binding domain-containing protein 1	Q7Z2Z2	ETUD1_HUMAN	EFTUD1
P2	Bufalin	0.6	DB00421	Voltage-dependent calcium channel subunit alpha-2/delta-3	Q8IZS8	CA2D3_HUMAN	CACNA2D3
P2	Bufalin	0.6591	DB01708	Gamma-aminobutyric acid receptor subunit gamma-1	Q8N1C3	GBRG1_HUMAN	GABRG1
P2	Bufalin	0.6	DB07177	Prostaglandin reductase 2	Q8N8N7	PTGR2_HUMAN	PTGR2
P2	Bufalin	0.75	DB02854	Estradiol 17-beta-dehydrogenase 11	Q8NBQ5	DHB11_HUMAN	HSD17B11
P2	Bufalin	0.6591	DB01708	Glutamate receptor ionotropic, NMDA 3A	Q8TCU5	NMD3A_HUMAN	GRIN3A
P2	Bufalin	0.7561	DB00783	Estrogen receptor beta	Q92731	ESR2_HUMAN	ESR2
P2	Bufalin	0.75	DB03882	Estrogen receptor beta	Q92731	ESR2_HUMAN	ESR2
P2	Bufalin	0.7442	DB04573	Estrogen receptor beta	Q92731	ESR2_HUMAN	ESR2
P2	Bufalin	0.7442	DB07702	Estrogen receptor beta	Q92731	ESR2_HUMAN	ESR2
P2	Bufalin	0.6591	DB01708	Estrogen receptor beta	Q92731	ESR2_HUMAN	ESR2
P2	Bufalin	0.6471	DB01108	Estrogen receptor beta	Q92731	ESR2_HUMAN	ESR2
P2	Bufalin	0.64	DB00227	Histone deacetylase 2	Q92769	HDAC2_HUMAN	HDAC2
P2	Bufalin	0.8095	DB06777	Bile acid receptor	Q96RI1	NR1H4_HUMAN	NR1H4
P2	Bufalin	0.7556	DB08220	Bile acid receptor	Q96RI1	NR1H4_HUMAN	NR1H4
P2	Bufalin	0.7317	DB07348	Cytohesin-2	Q99418	CYH2_HUMAN	CYTH2
P2	Bufalin	0.6591	DB01708	Sigma non-opioid intracellular receptor 1	Q99720	SGMR1_HUMAN	SIGMAR1
P2	Bufalin	0.6591	DB01708	Gamma-aminobutyric acid receptor subunit gamma-3	Q99928	GBRG3_HUMAN	GABRG3
P2	Bufalin	0.7021	DB00374	P2Y purinoceptor 12	Q9H244	P2Y12_HUMAN	P2RY12
P2	Bufalin	0.6739	DB01240	P2Y purinoceptor 12	Q9H244	P2Y12_HUMAN	P2RY12
P2	Bufalin	0.6	DB00421	Polyprenol reductase	Q9H8P0	PORED_HUMAN	SRD5A3
P2	Bufalin	0.7442	DB07702	Nuclear receptor coactivator 5	Q9HCD5	NCOA5_HUMAN	NCOA5
P2	Bufalin	0.6	DB00421	Voltage-dependent calcium channel subunit alpha-2/delta-2	Q9NY47	CA2D2_HUMAN	CACNA2D2
P2	Bufalin	0.6	DB00421	Voltage-dependent T-type calcium channel subunit alpha-1I	Q9P0X4	CAC1I_HUMAN	CACNA1I
P2	Bufalin	0.7045	DB00163	SEC14-like protein 4	Q9UDX3	S14L4_HUMAN	SEC14L4
P2	Bufalin	0.7045	DB00163	SEC14-like protein 3	Q9UDX4	S14L3_HUMAN	SEC14L3
P2	Bufalin	0.6591	DB01708	Gamma-aminobutyric acid receptor subunit theta	Q9UN88	GBRT_HUMAN	GABRQ
M3	3-Oxo-desacetylcinobufagin	0.6735	DB02859	Acetyl-CoA carboxylase 2	O00763	ACACB_HUMAN	ACACB
M3	3-Oxo-desacetylcinobufagin	0.64	DB02205	Glyceraldehyde-3-phosphate dehydrogenase, testis-specific	O14556	G3PT_HUMAN	GAPDHS
M3	3-Oxo-desacetylcinobufagin	0.6415	DB00466	Glycine receptor subunit alpha-3	O75311	GLRA3_HUMAN	GLRA3
M3	3-Oxo-desacetylcinobufagin	0.6333	DB00602	Glycine receptor subunit alpha-3	O75311	GLRA3_HUMAN	GLRA3
M3	3-Oxo-desacetylcinobufagin	0.6596	DB00163	Nuclear receptor subfamily 1 group I member 2	O75469	NR1I2_HUMAN	NR1I2
M3	3-Oxo-desacetylcinobufagin	0.6	DB01892	Nuclear receptor subfamily 1 group I member 2	O75469	NR1I2_HUMAN	NR1I2
M3	3-Oxo-desacetylcinobufagin	0.6596	DB00163	SEC14-like protein 2	O76054	S14L2_HUMAN	SEC14L2
M3	3-Oxo-desacetylcinobufagin	0.6538	DB02587	Adenylate cyclase type 5	O95622	ADCY5_HUMAN	ADCY5
M3	3-Oxo-desacetylcinobufagin	0.6458	DB02659	Alcohol dehydrogenase 1C	P00326	ADH1G_HUMAN	ADH1C
M3	3-Oxo-desacetylcinobufagin	0.6458	DB02659	Cytochrome c oxidase subunit 1	P00395	COX1_HUMAN	MT-CO1
M3	3-Oxo-desacetylcinobufagin	0.6458	DB02659	Cytochrome c oxidase subunit 2	P00403	COX2_HUMAN	MT-CO2
M3	3-Oxo-desacetylcinobufagin	0.6458	DB02659	Cytochrome c oxidase subunit 3	P00414	COX3_HUMAN	MT-CO3
M3	3-Oxo-desacetylcinobufagin	0.6047	DB07375	Ig kappa chain C region	P01834	IGKC_HUMAN	IGKC
M3	3-Oxo-desacetylcinobufagin	0.6047	DB07375	Ig gamma-1 chain C region	P01857	IGHG1_HUMAN	IGHG1
M3	3-Oxo-desacetylcinobufagin	0.6458	DB08510	Ig gamma-2 chain C region	P01859	IGHG2_HUMAN	IGHG2
M3	3-Oxo-desacetylcinobufagin	0.6222	DB02854	Ig gamma-2 chain C region	P01859	IGHG2_HUMAN	IGHG2
M3	3-Oxo-desacetylcinobufagin	0.6047	DB07375	Ig gamma-2 chain C region	P01859	IGHG2_HUMAN	IGHG2
M3	3-Oxo-desacetylcinobufagin	0.6591	DB00655	Estrogen receptor	P03372	ESR1_HUMAN	ESR1
M3	3-Oxo-desacetylcinobufagin	0.6415	DB01108	Estrogen receptor	P03372	ESR1_HUMAN	ESR1
M3	3-Oxo-desacetylcinobufagin	0.64	DB07087	Estrogen receptor	P03372	ESR1_HUMAN	ESR1
M3	3-Oxo-desacetylcinobufagin	0.6327	DB00603	Estrogen receptor	P03372	ESR1_HUMAN	ESR1
M3	3-Oxo-desacetylcinobufagin	0.625	DB04573	Estrogen receptor	P03372	ESR1_HUMAN	ESR1
M3	3-Oxo-desacetylcinobufagin	0.617	DB06871	Estrogen receptor	P03372	ESR1_HUMAN	ESR1
M3	3-Oxo-desacetylcinobufagin	0.6	DB00823	Estrogen receptor	P03372	ESR1_HUMAN	ESR1
M3	3-Oxo-desacetylcinobufagin	0.6604	DB00641	3-hydroxy-3-methylglutaryl-coenzyme A reductase	P04035	HMDH_HUMAN	HMGCR
M3	3-Oxo-desacetylcinobufagin	0.6346	DB00227	3-hydroxy-3-methylglutaryl-coenzyme A reductase	P04035	HMDH_HUMAN	HMGCR
M3	3-Oxo-desacetylcinobufagin	0.6458	DB02659	Phospholipase A2	P04054	PA21B_HUMAN	PLA2G1B
M3	3-Oxo-desacetylcinobufagin	0.6379	DB00288	Annexin A1	P04083	ANXA1_HUMAN	ANXA1
M3	3-Oxo-desacetylcinobufagin	0.6	DB00741	Annexin A1	P04083	ANXA1_HUMAN	ANXA1
M3	3-Oxo-desacetylcinobufagin	0.6909	DB01410	Glucocorticoid receptor	P04150	GCR_HUMAN	NR3C1
M3	3-Oxo-desacetylcinobufagin	0.6607	DB01260	Glucocorticoid receptor	P04150	GCR_HUMAN	NR3C1
M3	3-Oxo-desacetylcinobufagin	0.6607	DB01222	Glucocorticoid receptor	P04150	GCR_HUMAN	NR3C1
M3	3-Oxo-desacetylcinobufagin	0.6379	DB00288	Glucocorticoid receptor	P04150	GCR_HUMAN	NR3C1
M3	3-Oxo-desacetylcinobufagin	0.6327	DB00351	Glucocorticoid receptor	P04150	GCR_HUMAN	NR3C1
M3	3-Oxo-desacetylcinobufagin	0.6296	DB01380	Glucocorticoid receptor	P04150	GCR_HUMAN	NR3C1
M3	3-Oxo-desacetylcinobufagin	0.6167	DB00846	Glucocorticoid receptor	P04150	GCR_HUMAN	NR3C1
M3	3-Oxo-desacetylcinobufagin	0.6122	DB00253	Glucocorticoid receptor	P04150	GCR_HUMAN	NR3C1
M3	3-Oxo-desacetylcinobufagin	0.6	DB00860	Glucocorticoid receptor	P04150	GCR_HUMAN	NR3C1
M3	3-Oxo-desacetylcinobufagin	0.6	DB00741	Glucocorticoid receptor	P04150	GCR_HUMAN	NR3C1
M3	3-Oxo-desacetylcinobufagin	0.6	DB00635	Glucocorticoid receptor	P04150	GCR_HUMAN	NR3C1
M3	3-Oxo-desacetylcinobufagin	0.6	DB03010	Tubulin beta-4A chain	P04350	TBB4A_HUMAN	TUBB4A
M3	3-Oxo-desacetylcinobufagin	0.6327	DB02342	Cytochrome P450 1A1	P04798	CP1A1_HUMAN	CYP1A1
M3	3-Oxo-desacetylcinobufagin	0.7222	DB00511	Sodium/potassium-transporting ATPase subunit alpha-1	P05023	AT1A1_HUMAN	ATP1A1
M3	3-Oxo-desacetylcinobufagin	0.6909	DB01396	Sodium/potassium-transporting ATPase subunit alpha-1	P05023	AT1A1_HUMAN	ATP1A1
M3	3-Oxo-desacetylcinobufagin	0.6786	DB00390	Sodium/potassium-transporting ATPase subunit alpha-1	P05023	AT1A1_HUMAN	ATP1A1
M3	3-Oxo-desacetylcinobufagin	0.6552	DB01092	Sodium/potassium-transporting ATPase subunit alpha-1	P05023	AT1A1_HUMAN	ATP1A1
M3	3-Oxo-desacetylcinobufagin	0.6441	DB01078	Sodium/potassium-transporting ATPase subunit alpha-1	P05023	AT1A1_HUMAN	ATP1A1
M3	3-Oxo-desacetylcinobufagin	0.6604	DB00641	Integrin beta-2	P05107	ITB2_HUMAN	ITGB2
M3	3-Oxo-desacetylcinobufagin	0.6596	DB00163	Protein kinase C beta type	P05771	KPCB_HUMAN	PRKCB
M3	3-Oxo-desacetylcinobufagin	0.6327	DB00603	Progesterone receptor	P06401	PRGR_HUMAN	PGR
M3	3-Oxo-desacetylcinobufagin	0.6327	DB00351	Progesterone receptor	P06401	PRGR_HUMAN	PGR
M3	3-Oxo-desacetylcinobufagin	0.6327	DB01395	Progesterone receptor	P06401	PRGR_HUMAN	PGR
M3	3-Oxo-desacetylcinobufagin	0.6	DB00823	Progesterone receptor	P06401	PRGR_HUMAN	PGR
M3	3-Oxo-desacetylcinobufagin	0.6346	DB07394	ATP synthase subunit beta, mitochondrial	P06576	ATPB_HUMAN	ATP5B
M3	3-Oxo-desacetylcinobufagin	0.6	DB03010	Tubulin beta chain	P07437	TBB5_HUMAN	TUBB
M3	3-Oxo-desacetylcinobufagin	0.6538	DB00700	Mineralocorticoid receptor	P08235	MCR_HUMAN	NR3C2
M3	3-Oxo-desacetylcinobufagin	0.6327	DB01395	Mineralocorticoid receptor	P08235	MCR_HUMAN	NR3C2
M3	3-Oxo-desacetylcinobufagin	0.6038	DB04652	Mineralocorticoid receptor	P08235	MCR_HUMAN	NR3C2
M3	3-Oxo-desacetylcinobufagin	0.617	DB03758	Heat shock protein HSP 90-beta	P08238	HS90B_HUMAN	HSP90AB1
M3	3-Oxo-desacetylcinobufagin	0.6458	DB02659	Cytochrome c oxidase subunit 6C	P09669	COX6C_HUMAN	COX6C
M3	3-Oxo-desacetylcinobufagin	0.6596	DB00163	Arachidonate 5-lipoxygenase	P09917	LOX5_HUMAN	ALOX5
M3	3-Oxo-desacetylcinobufagin	0.6	DB01892	Arachidonate 5-lipoxygenase	P09917	LOX5_HUMAN	ALOX5
M3	3-Oxo-desacetylcinobufagin	0.6458	DB02659	Cytochrome c oxidase subunit 8A, mitochondrial	P10176	COX8A_HUMAN	COX8A
M3	3-Oxo-desacetylcinobufagin	0.6875	DB00621	Androgen receptor	P10275	ANDR_HUMAN	AR
M3	3-Oxo-desacetylcinobufagin	0.6327	DB01395	Androgen receptor	P10275	ANDR_HUMAN	AR
M3	3-Oxo-desacetylcinobufagin	0.6222	DB02901	Androgen receptor	P10275	ANDR_HUMAN	AR
M3	3-Oxo-desacetylcinobufagin	0.6087	DB01481	Androgen receptor	P10275	ANDR_HUMAN	AR
M3	3-Oxo-desacetylcinobufagin	0.6087	DB00858	Androgen receptor	P10275	ANDR_HUMAN	AR
M3	3-Oxo-desacetylcinobufagin	0.617	DB03758	Dihydrolipoyllysine-residue acetyltransferase component of pyruvate dehydrogenase complex, mitochondrial	P10515	ODP2_HUMAN	DLAT
M3	3-Oxo-desacetylcinobufagin	0.6458	DB02659	Cytochrome c oxidase subunit 5B, mitochondrial	P10606	COX5B_HUMAN	COX5B
M3	3-Oxo-desacetylcinobufagin	0.6383	DB00894	Aromatase	P11511	CP19A_HUMAN	CYP19A1
M3	3-Oxo-desacetylcinobufagin	0.6327	DB02342	Aromatase	P11511	CP19A_HUMAN	CYP19A1
M3	3-Oxo-desacetylcinobufagin	0.6222	DB02507	Cytochrome P450 2C9	P11712	CP2C9_HUMAN	CYP2C9
M3	3-Oxo-desacetylcinobufagin	0.6458	DB02659	Cytochrome c oxidase subunit 4 isoform 1, mitochondrial	P13073	COX41_HUMAN	COX4I1
M3	3-Oxo-desacetylcinobufagin	0.6415	DB01108	3 beta-hydroxysteroid dehydrogenase/Delta 5-->4-isomerase type 1	P14060	3BHS1_HUMAN	HSD3B1
M3	3-Oxo-desacetylcinobufagin	0.6222	DB02901	Estradiol 17-beta-dehydrogenase 1	P14061	DHB1_HUMAN	HSD17B1
M3	3-Oxo-desacetylcinobufagin	0.6047	DB01561	Estradiol 17-beta-dehydrogenase 1	P14061	DHB1_HUMAN	HSD17B1
M3	3-Oxo-desacetylcinobufagin	0.6042	DB02187	Estradiol 17-beta-dehydrogenase 1	P14061	DHB1_HUMAN	HSD17B1
M3	3-Oxo-desacetylcinobufagin	0.617	DB03758	Endoplasmin	P14625	ENPL_HUMAN	HSP90B1
M3	3-Oxo-desacetylcinobufagin	0.6458	DB02659	Cytochrome c oxidase subunit 6B1	P14854	CX6B1_HUMAN	COX6B1
M3	3-Oxo-desacetylcinobufagin	0.6415	DB00466	Gamma-aminobutyric acid receptor subunit alpha-1	P14867	GBRA1_HUMAN	GABRA1
M3	3-Oxo-desacetylcinobufagin	0.6087	DB05087	Gamma-aminobutyric acid receptor subunit alpha-1	P14867	GBRA1_HUMAN	GABRA1
M3	3-Oxo-desacetylcinobufagin	0.6458	DB02659	Cytochrome c oxidase subunit 7C, mitochondrial	P15954	COX7C_HUMAN	COX7C
M3	3-Oxo-desacetylcinobufagin	0.6596	DB00163	Protein kinase C alpha type	P17252	KPCA_HUMAN	PRKCA
M3	3-Oxo-desacetylcinobufagin	0.6458	DB02659	Cytochrome c oxidase subunit 5A, mitochondrial	P20674	COX5A_HUMAN	COX5A
M3	3-Oxo-desacetylcinobufagin	0.6346	DB00227	Integrin alpha-L	P20701	ITAL_HUMAN	ITGAL
M3	3-Oxo-desacetylcinobufagin	0.6875	DB00486	Cannabinoid receptor 1	P21554	CNR1_HUMAN	CNR1
M3	3-Oxo-desacetylcinobufagin	0.6327	DB02342	Catechol O-methyltransferase	P21964	COMT_HUMAN	COMT
M3	3-Oxo-desacetylcinobufagin	0.6458	DB02659	Ferrochelatase, mitochondrial	P22830	HEMH_HUMAN	FECH
M3	3-Oxo-desacetylcinobufagin	0.6458	DB02659	Liver carboxylesterase 1	P23141	EST1_HUMAN	CES1
M3	3-Oxo-desacetylcinobufagin	0.6	DB01892	Prostaglandin G/H synthase 1	P23219	PGH1_HUMAN	PTGS1
M3	3-Oxo-desacetylcinobufagin	0.6415	DB00466	Glycine receptor subunit alpha-2	P23416	GLRA2_HUMAN	GLRA2
M3	3-Oxo-desacetylcinobufagin	0.6596	DB00163	Diacylglycerol kinase alpha	P23743	DGKA_HUMAN	DGKA
M3	3-Oxo-desacetylcinobufagin	0.6415	DB00466	Gamma-aminobutyric acid receptor subunit rho-1	P24046	GBRR1_HUMAN	GABRR1
M3	3-Oxo-desacetylcinobufagin	0.6458	DB02659	Cytochrome c oxidase subunit 7A1, mitochondrial	P24310	CX7A1_HUMAN	COX7A1
M3	3-Oxo-desacetylcinobufagin	0.6458	DB02659	Cytochrome c oxidase subunit 7B, mitochondrial	P24311	COX7B_HUMAN	COX7B
M3	3-Oxo-desacetylcinobufagin	0.6346	DB07394	ATP synthase subunit alpha, mitochondrial	P25705	ATPA_HUMAN	ATP5A1
M3	3-Oxo-desacetylcinobufagin	0.6415	DB01108	3 beta-hydroxysteroid dehydrogenase/Delta 5-->4-isomerase type 2	P26439	3BHS2_HUMAN	HSD3B2
M3	3-Oxo-desacetylcinobufagin	0.6607	DB08059	Phosphatidylinositol 3-kinase regulatory subunit alpha	P27986	P85A_HUMAN	PIK3R1
M3	3-Oxo-desacetylcinobufagin	0.6333	DB00602	Gamma-aminobutyric acid receptor subunit beta-3	P28472	GBRB3_HUMAN	GABRB3
M3	3-Oxo-desacetylcinobufagin	0.6038	DB04652	Corticosteroid 11-beta-dehydrogenase isozyme 1	P28845	DHI1_HUMAN	HSD11B1
M3	3-Oxo-desacetylcinobufagin	0.6	DB00635	Corticosteroid 11-beta-dehydrogenase isozyme 1	P28845	DHI1_HUMAN	HSD11B1
M3	3-Oxo-desacetylcinobufagin	0.6087	DB05087	Gamma-aminobutyric acid receptor subunit alpha-5	P31644	GBRA5_HUMAN	GABRA5
M3	3-Oxo-desacetylcinobufagin	0.6087	DB05087	Gamma-aminobutyric acid receptor subunit alpha-3	P34903	GBRA3_HUMAN	GABRA3
M3	3-Oxo-desacetylcinobufagin	0.6875	DB00486	Cannabinoid receptor 2	P34972	CNR2_HUMAN	CNR2
M3	3-Oxo-desacetylcinobufagin	0.6346	DB07394	ATP synthase subunit gamma, mitochondrial	P36542	ATPG_HUMAN	ATP5C1
M3	3-Oxo-desacetylcinobufagin	0.6607	DB02169	Serine/threonine-protein phosphatase PP1-gamma catalytic subunit	P36873	PP1G_HUMAN	PPP1CC
M3	3-Oxo-desacetylcinobufagin	0.6111	DB07700	Aldo-keto reductase family 1 member C3	P42330	AK1C3_HUMAN	AKR1C3
M3	3-Oxo-desacetylcinobufagin	0.6607	DB08059	Phosphatidylinositol 4,5-bisphosphate 3-kinase catalytic subunit alpha isoform	P42336	PK3CA_HUMAN	PIK3CA
M3	3-Oxo-desacetylcinobufagin	0.6087	DB05087	Gamma-aminobutyric acid receptor subunit alpha-2	P47869	GBRA2_HUMAN	GABRA2
M3	3-Oxo-desacetylcinobufagin	0.6087	DB05087	Gamma-aminobutyric acid receptor subunit alpha-4	P48169	GBRA4_HUMAN	GABRA4
M3	3-Oxo-desacetylcinobufagin	0.6607	DB08059	Phosphatidylinositol 4,5-bisphosphate 3-kinase catalytic subunit gamma isoform	P48736	PK3CG_HUMAN	PIK3CG
M3	3-Oxo-desacetylcinobufagin	0.6458	DB02659	Gastrotropin	P51161	FABP6_HUMAN	FABP6
M3	3-Oxo-desacetylcinobufagin	0.6275	DB01046	Chloride channel protein 2	P51788	CLCN2_HUMAN	CLCN2
M3	3-Oxo-desacetylcinobufagin	0.6222	DB07447	3-oxo-5-beta-steroid 4-dehydrogenase	P51857	AK1D1_HUMAN	AKR1D1
M3	3-Oxo-desacetylcinobufagin	0.6458	DB01586	Aldo-keto reductase family 1 member C2	P52895	AK1C2_HUMAN	AKR1C2
M3	3-Oxo-desacetylcinobufagin	0.6607	DB08059	Serine/threonine-protein kinase PLK1	P53350	PLK1_HUMAN	PLK1
M3	3-Oxo-desacetylcinobufagin	0.6458	DB02659	Estrogen-related receptor gamma	P62508	ERR3_HUMAN	ESRRG
M3	3-Oxo-desacetylcinobufagin	0.6596	DB00163	Serine/threonine-protein phosphatase 2A catalytic subunit beta isoform	P62714	PP2AB_HUMAN	PPP2CB
M3	3-Oxo-desacetylcinobufagin	0.6538	DB02587	Guanine nucleotide-binding protein G(s) subunit alpha isoforms short	P63092	GNAS2_HUMAN	GNAS
M3	3-Oxo-desacetylcinobufagin	0.6596	DB00163	Serine/threonine-protein phosphatase 2A catalytic subunit alpha isoform	P67775	PP2AA_HUMAN	PPP2CA
M3	3-Oxo-desacetylcinobufagin	0.6	DB03010	Tubulin alpha-1B chain	P68363	TBA1B_HUMAN	TUBA1B
M3	3-Oxo-desacetylcinobufagin	0.6	DB03010	Tubulin alpha-4A chain	P68366	TBA4A_HUMAN	TUBA4A
M3	3-Oxo-desacetylcinobufagin	0.6	DB03010	Tubulin beta-4B chain	P68371	TBB4B_HUMAN	TUBB4B
M3	3-Oxo-desacetylcinobufagin	0.6458	DB02659	Cytochrome c oxidase subunit 6A2, mitochondrial	Q02221	CX6A2_HUMAN	COX6A2
M3	3-Oxo-desacetylcinobufagin	0.6222	DB02854	Bile salt sulfotransferase	Q06520	ST2A1_HUMAN	SULT2A1
M3	3-Oxo-desacetylcinobufagin	0.6538	DB02587	Adenylate cyclase type 2	Q08462	ADCY2_HUMAN	ADCY2
M3	3-Oxo-desacetylcinobufagin	0.6	DB03010	Tubulin beta-3 chain	Q13509	TBB3_HUMAN	TUBB3
M3	3-Oxo-desacetylcinobufagin	0.6	DB03010	Tubulin alpha-3C/D chain	Q13748	TBA3C_HUMAN	TUBA3C
M3	3-Oxo-desacetylcinobufagin	0.617	DB03758	[Pyruvate dehydrogenase (acetyl-transferring)] kinase isozyme 3, mitochondrial	Q15120	PDK3_HUMAN	PDK3
M3	3-Oxo-desacetylcinobufagin	0.64	DB07087	Nuclear receptor coactivator 2	Q15596	NCOA2_HUMAN	NCOA2
M3	3-Oxo-desacetylcinobufagin	0.617	DB06871	Nuclear receptor coactivator 2	Q15596	NCOA2_HUMAN	NCOA2
M3	3-Oxo-desacetylcinobufagin	0.6735	DB08220	Nuclear receptor coactivator 1	Q15788	NCOA1_HUMAN	NCOA1
M3	3-Oxo-desacetylcinobufagin	0.6038	DB04652	Nuclear receptor coactivator 1	Q15788	NCOA1_HUMAN	NCOA1
M3	3-Oxo-desacetylcinobufagin	0.6087	DB05087	Gamma-aminobutyric acid receptor subunit alpha-6	Q16445	GBRA6_HUMAN	GABRA6
M3	3-Oxo-desacetylcinobufagin	0.6327	DB02342	Hypoxia-inducible factor 1-alpha	Q16665	HIF1A_HUMAN	HIF1A
M3	3-Oxo-desacetylcinobufagin	0.6327	DB02342	Cytochrome P450 1B1	Q16678	CP1B1_HUMAN	CYP1B1
M3	3-Oxo-desacetylcinobufagin	0.6346	DB07815	Arylacetamide deacetylase-like 2	Q6P093	ADCL2_HUMAN	AADACL2
M3	3-Oxo-desacetylcinobufagin	0.6	DB03010	Tubulin alpha-1A chain	Q71U36	TBA1A_HUMAN	TUBA1A
M3	3-Oxo-desacetylcinobufagin	0.6458	DB02659	Ferrochelatase	Q7KZA3	Q7KZA3_HUMAN	DKFZp686P18130
M3	3-Oxo-desacetylcinobufagin	0.6458	DB07690	Elongation factor Tu GTP-binding domain-containing protein 1	Q7Z2Z2	ETUD1_HUMAN	EFTUD1
M3	3-Oxo-desacetylcinobufagin	0.6222	DB02854	Estradiol 17-beta-dehydrogenase 11	Q8NBQ5	DHB11_HUMAN	HSD17B11
M3	3-Oxo-desacetylcinobufagin	0.6415	DB01108	Estrogen receptor beta	Q92731	ESR2_HUMAN	ESR2
M3	3-Oxo-desacetylcinobufagin	0.625	DB04573	Estrogen receptor beta	Q92731	ESR2_HUMAN	ESR2
M3	3-Oxo-desacetylcinobufagin	0.625	DB07702	Estrogen receptor beta	Q92731	ESR2_HUMAN	ESR2
M3	3-Oxo-desacetylcinobufagin	0.6346	DB00227	Histone deacetylase 2	Q92769	HDAC2_HUMAN	HDAC2
M3	3-Oxo-desacetylcinobufagin	0.6735	DB08220	Bile acid receptor	Q96RI1	NR1H4_HUMAN	NR1H4
M3	3-Oxo-desacetylcinobufagin	0.6458	DB06777	Bile acid receptor	Q96RI1	NR1H4_HUMAN	NR1H4
M3	3-Oxo-desacetylcinobufagin	0.6222	DB00682	Vitamin K epoxide reductase complex subunit 1	Q9BQB6	VKOR1_HUMAN	VKORC1
M3	3-Oxo-desacetylcinobufagin	0.6	DB03010	Tubulin alpha-1C chain	Q9BQE3	TBA1C_HUMAN	TUBA1C
M3	3-Oxo-desacetylcinobufagin	0.6	DB03010	Tubulin beta-1 chain	Q9H4B7	TBB1_HUMAN	TUBB1
M3	3-Oxo-desacetylcinobufagin	0.625	DB07702	Nuclear receptor coactivator 5	Q9HCD5	NCOA5_HUMAN	NCOA5
M3	3-Oxo-desacetylcinobufagin	0.6	DB03010	Tubulin alpha-8 chain	Q9NY65	TBA8_HUMAN	TUBA8
M3	3-Oxo-desacetylcinobufagin	0.6596	DB00163	SEC14-like protein 4	Q9UDX3	S14L4_HUMAN	SEC14L4
M3	3-Oxo-desacetylcinobufagin	0.6596	DB00163	SEC14-like protein 3	Q9UDX4	S14L3_HUMAN	SEC14L3
P3	19-oxo-bufalin	0.6222	DB01708	Sulfotransferase family cytosolic 2B member 1	O00204	ST2B1_HUMAN	SULT2B1
P3	19-oxo-bufalin	0.6087	DB02789	Sulfotransferase family cytosolic 2B member 1	O00204	ST2B1_HUMAN	SULT2B1
P3	19-oxo-bufalin	0.6	DB00421	Voltage-dependent L-type calcium channel subunit beta-4	O00305	CACB4_HUMAN	CACNB4
P3	19-oxo-bufalin	0.6	DB00421	Voltage-dependent P/Q-type calcium channel subunit alpha-1A	O00555	CAC1A_HUMAN	CACNA1A
P3	19-oxo-bufalin	0.6222	DB01708	Gamma-aminobutyric acid receptor subunit pi	O00591	GBRP_HUMAN	GABRP
P3	19-oxo-bufalin	0.6122	DB02859	Acetyl-CoA carboxylase 2	O00763	ACACB_HUMAN	ACACB
P3	19-oxo-bufalin	0.6222	DB01708	Gamma-aminobutyric acid receptor subunit delta	O14764	GBRD_HUMAN	GABRD
P3	19-oxo-bufalin	0.6222	DB01708	Glutamate receptor ionotropic, NMDA 2D	O15399	NMDE4_HUMAN	GRIN2D
P3	19-oxo-bufalin	0.6	DB00421	Voltage-dependent T-type calcium channel subunit alpha-1G	O43497	CAC1G_HUMAN	CACNA1G
P3	19-oxo-bufalin	0.6222	DB01708	Glutamate receptor ionotropic, NMDA 3B	O60391	NMD3B_HUMAN	GRIN3B
P3	19-oxo-bufalin	0.6	DB00421	Voltage-dependent L-type calcium channel subunit alpha-1F	O60840	CAC1F_HUMAN	CACNA1F
P3	19-oxo-bufalin	0.6102	DB00602	Glycine receptor subunit alpha-3	O75311	GLRA3_HUMAN	GLRA3
P3	19-oxo-bufalin	0.7561	DB00783	Nuclear receptor subfamily 1 group I member 2	O75469	NR1I2_HUMAN	NR1I2
P3	19-oxo-bufalin	0.7381	DB00977	Nuclear receptor subfamily 1 group I member 2	O75469	NR1I2_HUMAN	NR1I2
P3	19-oxo-bufalin	0.6667	DB00163	Nuclear receptor subfamily 1 group I member 2	O75469	NR1I2_HUMAN	NR1I2
P3	19-oxo-bufalin	0.6222	DB01708	Nuclear receptor subfamily 1 group I member 2	O75469	NR1I2_HUMAN	NR1I2
P3	19-oxo-bufalin	0.6042	DB01892	Nuclear receptor subfamily 1 group I member 2	O75469	NR1I2_HUMAN	NR1I2
P3	19-oxo-bufalin	0.6667	DB00163	SEC14-like protein 2	O76054	S14L2_HUMAN	SEC14L2
P3	19-oxo-bufalin	0.6	DB00421	Voltage-dependent T-type calcium channel subunit alpha-1H	O95180	CAC1H_HUMAN	CACNA1H
P3	19-oxo-bufalin	0.6939	DB02587	Adenylate cyclase type 5	O95622	ADCY5_HUMAN	ADCY5
P3	19-oxo-bufalin	0.7674	DB02659	Alcohol dehydrogenase 1C	P00326	ADH1G_HUMAN	ADH1C
P3	19-oxo-bufalin	0.6667	DB07714	Glutathione reductase, mitochondrial	P00390	GSHR_HUMAN	GSR
P3	19-oxo-bufalin	0.6279	DB01644	Glutathione reductase, mitochondrial	P00390	GSHR_HUMAN	GSR
P3	19-oxo-bufalin	0.7674	DB02659	Cytochrome c oxidase subunit 1	P00395	COX1_HUMAN	MT-CO1
P3	19-oxo-bufalin	0.7674	DB02659	Cytochrome c oxidase subunit 2	P00403	COX2_HUMAN	MT-CO2
P3	19-oxo-bufalin	0.7674	DB02659	Cytochrome c oxidase subunit 3	P00414	COX3_HUMAN	MT-CO3
P3	19-oxo-bufalin	0.62	DB01088	Tissue-type plasminogen activator	P00750	TPA_HUMAN	PLAT
P3	19-oxo-bufalin	0.6098	DB07375	Ig kappa chain C region	P01834	IGKC_HUMAN	IGKC
P3	19-oxo-bufalin	0.6098	DB07375	Ig gamma-1 chain C region	P01857	IGHG1_HUMAN	IGHG1
P3	19-oxo-bufalin	0.7273	DB08510	Ig gamma-2 chain C region	P01859	IGHG2_HUMAN	IGHG2
P3	19-oxo-bufalin	0.7073	DB02854	Ig gamma-2 chain C region	P01859	IGHG2_HUMAN	IGHG2
P3	19-oxo-bufalin	0.6667	DB08547	Ig gamma-2 chain C region	P01859	IGHG2_HUMAN	IGHG2
P3	19-oxo-bufalin	0.6098	DB07375	Ig gamma-2 chain C region	P01859	IGHG2_HUMAN	IGHG2
P3	19-oxo-bufalin	0.7561	DB00783	Estrogen receptor	P03372	ESR1_HUMAN	ESR1
P3	19-oxo-bufalin	0.7442	DB04573	Estrogen receptor	P03372	ESR1_HUMAN	ESR1
P3	19-oxo-bufalin	0.7381	DB06871	Estrogen receptor	P03372	ESR1_HUMAN	ESR1
P3	19-oxo-bufalin	0.7381	DB00977	Estrogen receptor	P03372	ESR1_HUMAN	ESR1
P3	19-oxo-bufalin	0.7073	DB00655	Estrogen receptor	P03372	ESR1_HUMAN	ESR1
P3	19-oxo-bufalin	0.6977	DB04575	Estrogen receptor	P03372	ESR1_HUMAN	ESR1
P3	19-oxo-bufalin	0.6889	DB07678	Estrogen receptor	P03372	ESR1_HUMAN	ESR1
P3	19-oxo-bufalin	0.6809	DB07087	Estrogen receptor	P03372	ESR1_HUMAN	ESR1
P3	19-oxo-bufalin	0.6667	DB07707	Estrogen receptor	P03372	ESR1_HUMAN	ESR1
P3	19-oxo-bufalin	0.6667	DB01357	Estrogen receptor	P03372	ESR1_HUMAN	ESR1
P3	19-oxo-bufalin	0.6222	DB01708	Estrogen receptor	P03372	ESR1_HUMAN	ESR1
P3	19-oxo-bufalin	0.62	DB01185	Estrogen receptor	P03372	ESR1_HUMAN	ESR1
P3	19-oxo-bufalin	0.6154	DB01108	Estrogen receptor	P03372	ESR1_HUMAN	ESR1
P3	19-oxo-bufalin	0.6042	DB00603	Estrogen receptor	P03372	ESR1_HUMAN	ESR1
P3	19-oxo-bufalin	0.6042	DB00823	Estrogen receptor	P03372	ESR1_HUMAN	ESR1
P3	19-oxo-bufalin	0.6667	DB00641	3-hydroxy-3-methylglutaryl-coenzyme A reductase	P04035	HMDH_HUMAN	HMGCR
P3	19-oxo-bufalin	0.64	DB00227	3-hydroxy-3-methylglutaryl-coenzyme A reductase	P04035	HMDH_HUMAN	HMGCR
P3	19-oxo-bufalin	0.6078	DB00175	3-hydroxy-3-methylglutaryl-coenzyme A reductase	P04035	HMDH_HUMAN	HMGCR
P3	19-oxo-bufalin	0.6078	DB06693	3-hydroxy-3-methylglutaryl-coenzyme A reductase	P04035	HMDH_HUMAN	HMGCR
P3	19-oxo-bufalin	0.7674	DB02659	Phospholipase A2	P04054	PA21B_HUMAN	PLA2G1B
P3	19-oxo-bufalin	0.6346	DB00741	Annexin A1	P04083	ANXA1_HUMAN	ANXA1
P3	19-oxo-bufalin	0.6522	DB00253	Glucocorticoid receptor	P04150	GCR_HUMAN	NR3C1
P3	19-oxo-bufalin	0.6471	DB00324	Glucocorticoid receptor	P04150	GCR_HUMAN	NR3C1
P3	19-oxo-bufalin	0.6415	DB00873	Glucocorticoid receptor	P04150	GCR_HUMAN	NR3C1
P3	19-oxo-bufalin	0.6364	DB01410	Glucocorticoid receptor	P04150	GCR_HUMAN	NR3C1
P3	19-oxo-bufalin	0.6364	DB01260	Glucocorticoid receptor	P04150	GCR_HUMAN	NR3C1
P3	19-oxo-bufalin	0.6364	DB01222	Glucocorticoid receptor	P04150	GCR_HUMAN	NR3C1
P3	19-oxo-bufalin	0.6346	DB00860	Glucocorticoid receptor	P04150	GCR_HUMAN	NR3C1
P3	19-oxo-bufalin	0.6346	DB00741	Glucocorticoid receptor	P04150	GCR_HUMAN	NR3C1
P3	19-oxo-bufalin	0.6346	DB00635	Glucocorticoid receptor	P04150	GCR_HUMAN	NR3C1
P3	19-oxo-bufalin	0.6346	DB01380	Glucocorticoid receptor	P04150	GCR_HUMAN	NR3C1
P3	19-oxo-bufalin	0.625	DB00896	Glucocorticoid receptor	P04150	GCR_HUMAN	NR3C1
P3	19-oxo-bufalin	0.6226	DB00959	Glucocorticoid receptor	P04150	GCR_HUMAN	NR3C1
P3	19-oxo-bufalin	0.6226	DB00764	Glucocorticoid receptor	P04150	GCR_HUMAN	NR3C1
P3	19-oxo-bufalin	0.62	DB01185	Glucocorticoid receptor	P04150	GCR_HUMAN	NR3C1
P3	19-oxo-bufalin	0.6042	DB00351	Glucocorticoid receptor	P04150	GCR_HUMAN	NR3C1
P3	19-oxo-bufalin	0.6	DB00421	Glucocorticoid receptor	P04150	GCR_HUMAN	NR3C1
P3	19-oxo-bufalin	0.6	DB00421	Sex hormone-binding globulin	P04278	SHBG_HUMAN	SHBG
P3	19-oxo-bufalin	0.7111	DB02342	Cytochrome P450 1A1	P04798	CP1A1_HUMAN	CYP1A1
P3	19-oxo-bufalin	0.7308	DB00511	Sodium/potassium-transporting ATPase subunit alpha-1	P05023	AT1A1_HUMAN	ATP1A1
P3	19-oxo-bufalin	0.6981	DB01396	Sodium/potassium-transporting ATPase subunit alpha-1	P05023	AT1A1_HUMAN	ATP1A1
P3	19-oxo-bufalin	0.6852	DB00390	Sodium/potassium-transporting ATPase subunit alpha-1	P05023	AT1A1_HUMAN	ATP1A1
P3	19-oxo-bufalin	0.6607	DB01092	Sodium/potassium-transporting ATPase subunit alpha-1	P05023	AT1A1_HUMAN	ATP1A1
P3	19-oxo-bufalin	0.6491	DB01078	Sodium/potassium-transporting ATPase subunit alpha-1	P05023	AT1A1_HUMAN	ATP1A1
P3	19-oxo-bufalin	0.625	DB05812	Steroid 17-alpha-hydroxylase/17,20 lyase	P05093	CP17A_HUMAN	CYP17A1
P3	19-oxo-bufalin	0.6667	DB00641	Integrin beta-2	P05107	ITB2_HUMAN	ITGB2
P3	19-oxo-bufalin	0.6667	DB00163	Protein kinase C beta type	P05771	KPCB_HUMAN	PRKCB
P3	19-oxo-bufalin	0.6444	DB02998	Progesterone receptor	P06401	PRGR_HUMAN	PGR
P3	19-oxo-bufalin	0.6444	DB00717	Progesterone receptor	P06401	PRGR_HUMAN	PGR
P3	19-oxo-bufalin	0.6042	DB00603	Progesterone receptor	P06401	PRGR_HUMAN	PGR
P3	19-oxo-bufalin	0.6042	DB00351	Progesterone receptor	P06401	PRGR_HUMAN	PGR
P3	19-oxo-bufalin	0.6042	DB00823	Progesterone receptor	P06401	PRGR_HUMAN	PGR
P3	19-oxo-bufalin	0.6042	DB01395	Progesterone receptor	P06401	PRGR_HUMAN	PGR
P3	19-oxo-bufalin	0.6	DB00421	Progesterone receptor	P06401	PRGR_HUMAN	PGR
P3	19-oxo-bufalin	0.6522	DB07908	Profilin-1	P07737	PROF1_HUMAN	PFN1
P3	19-oxo-bufalin	0.6531	DB04630	Mineralocorticoid receptor	P08235	MCR_HUMAN	NR3C2
P3	19-oxo-bufalin	0.64	DB04652	Mineralocorticoid receptor	P08235	MCR_HUMAN	NR3C2
P3	19-oxo-bufalin	0.6042	DB01395	Mineralocorticoid receptor	P08235	MCR_HUMAN	NR3C2
P3	19-oxo-bufalin	0.6	DB00421	Mineralocorticoid receptor	P08235	MCR_HUMAN	NR3C2
P3	19-oxo-bufalin	0.7674	DB02659	Cytochrome c oxidase subunit 6C	P09669	COX6C_HUMAN	COX6C
P3	19-oxo-bufalin	0.6667	DB00163	Arachidonate 5-lipoxygenase	P09917	LOX5_HUMAN	ALOX5
P3	19-oxo-bufalin	0.6042	DB01892	Arachidonate 5-lipoxygenase	P09917	LOX5_HUMAN	ALOX5
P3	19-oxo-bufalin	0.7674	DB02659	Cytochrome c oxidase subunit 8A, mitochondrial	P10176	COX8A_HUMAN	COX8A
P3	19-oxo-bufalin	0.7727	DB00621	Androgen receptor	P10275	ANDR_HUMAN	AR
P3	19-oxo-bufalin	0.7073	DB02901	Androgen receptor	P10275	ANDR_HUMAN	AR
P3	19-oxo-bufalin	0.6905	DB01481	Androgen receptor	P10275	ANDR_HUMAN	AR
P3	19-oxo-bufalin	0.6905	DB00858	Androgen receptor	P10275	ANDR_HUMAN	AR
P3	19-oxo-bufalin	0.6444	DB01541	Androgen receptor	P10275	ANDR_HUMAN	AR
P3	19-oxo-bufalin	0.6444	DB00624	Androgen receptor	P10275	ANDR_HUMAN	AR
P3	19-oxo-bufalin	0.6444	DB02998	Androgen receptor	P10275	ANDR_HUMAN	AR
P3	19-oxo-bufalin	0.6304	DB06710	Androgen receptor	P10275	ANDR_HUMAN	AR
P3	19-oxo-bufalin	0.6304	DB01564	Androgen receptor	P10275	ANDR_HUMAN	AR
P3	19-oxo-bufalin	0.6304	DB00984	Androgen receptor	P10275	ANDR_HUMAN	AR
P3	19-oxo-bufalin	0.62	DB07717	Androgen receptor	P10275	ANDR_HUMAN	AR
P3	19-oxo-bufalin	0.62	DB01185	Androgen receptor	P10275	ANDR_HUMAN	AR
P3	19-oxo-bufalin	0.6042	DB01395	Androgen receptor	P10275	ANDR_HUMAN	AR
P3	19-oxo-bufalin	0.6	DB00421	Androgen receptor	P10275	ANDR_HUMAN	AR
P3	19-oxo-bufalin	0.7674	DB02659	Cytochrome c oxidase subunit 5B, mitochondrial	P10606	COX5B_HUMAN	COX5B
P3	19-oxo-bufalin	0.6182	DB01177	DNA topoisomerase 2-alpha	P11388	TOP2A_HUMAN	TOP2A
P3	19-oxo-bufalin	0.6444	DB05107	Glucose-6-phosphate 1-dehydrogenase	P11413	G6PD_HUMAN	G6PD
P3	19-oxo-bufalin	0.625	DB02300	Vitamin D3 receptor	P11473	VDR_HUMAN	VDR
P3	19-oxo-bufalin	0.6042	DB00910	Vitamin D3 receptor	P11473	VDR_HUMAN	VDR
P3	19-oxo-bufalin	0.6042	DB00146	Vitamin D3 receptor	P11473	VDR_HUMAN	VDR
P3	19-oxo-bufalin	0.6	DB00136	Vitamin D3 receptor	P11473	VDR_HUMAN	VDR
P3	19-oxo-bufalin	0.7111	DB02342	Aromatase	P11511	CP19A_HUMAN	CYP19A1
P3	19-oxo-bufalin	0.6444	DB00894	Aromatase	P11511	CP19A_HUMAN	CYP19A1
P3	19-oxo-bufalin	0.6279	DB02507	Cytochrome P450 2C9	P11712	CP2C9_HUMAN	CYP2C9
P3	19-oxo-bufalin	0.6604	DB01024	Inosine-5'-monophosphate dehydrogenase 2	P12268	IMDH2_HUMAN	IMPDH2
P3	19-oxo-bufalin	0.7674	DB02659	Cytochrome c oxidase subunit 4 isoform 1, mitochondrial	P13073	COX41_HUMAN	COX4I1
P3	19-oxo-bufalin	0.6154	DB01108	3 beta-hydroxysteroid dehydrogenase/Delta 5-->4-isomerase type 1	P14060	3BHS1_HUMAN	HSD3B1
P3	19-oxo-bufalin	0.7073	DB02901	Estradiol 17-beta-dehydrogenase 1	P14061	DHB1_HUMAN	HSD17B1
P3	19-oxo-bufalin	0.6444	DB02187	Estradiol 17-beta-dehydrogenase 1	P14061	DHB1_HUMAN	HSD17B1
P3	19-oxo-bufalin	0.6222	DB01708	Estradiol 17-beta-dehydrogenase 1	P14061	DHB1_HUMAN	HSD17B1
P3	19-oxo-bufalin	0.6098	DB01561	Estradiol 17-beta-dehydrogenase 1	P14061	DHB1_HUMAN	HSD17B1
P3	19-oxo-bufalin	0.7674	DB02659	Cytochrome c oxidase subunit 6B1	P14854	CX6B1_HUMAN	COX6B1
P3	19-oxo-bufalin	0.6905	DB05087	Gamma-aminobutyric acid receptor subunit alpha-1	P14867	GBRA1_HUMAN	GABRA1
P3	19-oxo-bufalin	0.6222	DB01708	Gamma-aminobutyric acid receptor subunit alpha-1	P14867	GBRA1_HUMAN	GABRA1
P3	19-oxo-bufalin	0.7674	DB02659	Cytochrome c oxidase subunit 7C, mitochondrial	P15954	COX7C_HUMAN	COX7C
P3	19-oxo-bufalin	0.62	DB01185	Prolactin receptor	P16471	PRLR_HUMAN	PRLR
P3	19-oxo-bufalin	0.6667	DB00163	Protein kinase C alpha type	P17252	KPCA_HUMAN	PRKCA
P3	19-oxo-bufalin	0.6	DB00421	3-oxo-5-alpha-steroid 4-dehydrogenase 1	P18405	S5A1_HUMAN	SRD5A1
P3	19-oxo-bufalin	0.6222	DB01708	Gamma-aminobutyric acid receptor subunit beta-1	P18505	GBRB1_HUMAN	GABRB1
P3	19-oxo-bufalin	0.6222	DB01708	Gamma-aminobutyric acid receptor subunit gamma-2	P18507	GBRG2_HUMAN	GABRG2
P3	19-oxo-bufalin	0.6	DB00421	Cytochrome P450 11B2, mitochondrial	P19099	C11B2_HUMAN	CYP11B2
P3	19-oxo-bufalin	0.7674	DB02659	Cytochrome c oxidase subunit 5A, mitochondrial	P20674	COX5A_HUMAN	COX5A
P3	19-oxo-bufalin	0.64	DB00227	Integrin alpha-L	P20701	ITAL_HUMAN	ITGAL
P3	19-oxo-bufalin	0.6604	DB01024	Inosine-5'-monophosphate dehydrogenase 1	P20839	IMDH1_HUMAN	IMPDH1
P3	19-oxo-bufalin	0.6596	DB00486	Cannabinoid receptor 1	P21554	CNR1_HUMAN	CNR1
P3	19-oxo-bufalin	0.7111	DB02342	Catechol O-methyltransferase	P21964	COMT_HUMAN	COMT
P3	19-oxo-bufalin	0.7674	DB02659	Ferrochelatase, mitochondrial	P22830	HEMH_HUMAN	FECH
P3	19-oxo-bufalin	0.7674	DB02659	Liver carboxylesterase 1	P23141	EST1_HUMAN	CES1
P3	19-oxo-bufalin	0.6957	DB08224	Liver carboxylesterase 1	P23141	EST1_HUMAN	CES1
P3	19-oxo-bufalin	0.6042	DB01892	Prostaglandin G/H synthase 1	P23219	PGH1_HUMAN	PTGS1
P3	19-oxo-bufalin	0.6667	DB00163	Diacylglycerol kinase alpha	P23743	DGKA_HUMAN	DGKA
P3	19-oxo-bufalin	0.7674	DB02659	Cytochrome c oxidase subunit 7A1, mitochondrial	P24310	CX7A1_HUMAN	COX7A1
P3	19-oxo-bufalin	0.7674	DB02659	Cytochrome c oxidase subunit 7B, mitochondrial	P24311	COX7B_HUMAN	COX7B
P3	19-oxo-bufalin	0.6154	DB01108	3 beta-hydroxysteroid dehydrogenase/Delta 5-->4-isomerase type 2	P26439	3BHS2_HUMAN	HSD3B2
P3	19-oxo-bufalin	0.62	DB01088	cAMP-specific 3',5'-cyclic phosphodiesterase 4A	P27815	PDE4A_HUMAN	PDE4A
P3	19-oxo-bufalin	0.6222	DB01708	Gamma-aminobutyric acid receptor subunit beta-3	P28472	GBRB3_HUMAN	GABRB3
P3	19-oxo-bufalin	0.6102	DB00602	Gamma-aminobutyric acid receptor subunit beta-3	P28472	GBRB3_HUMAN	GABRB3
P3	19-oxo-bufalin	0.6735	DB02329	Corticosteroid 11-beta-dehydrogenase isozyme 1	P28845	DHI1_HUMAN	HSD11B1
P3	19-oxo-bufalin	0.64	DB04652	Corticosteroid 11-beta-dehydrogenase isozyme 1	P28845	DHI1_HUMAN	HSD11B1
P3	19-oxo-bufalin	0.6346	DB00635	Corticosteroid 11-beta-dehydrogenase isozyme 1	P28845	DHI1_HUMAN	HSD11B1
P3	19-oxo-bufalin	0.6	DB00421	3-oxo-5-alpha-steroid 4-dehydrogenase 2	P31213	S5A2_HUMAN	SRD5A2
P3	19-oxo-bufalin	0.6905	DB05087	Gamma-aminobutyric acid receptor subunit alpha-5	P31644	GBRA5_HUMAN	GABRA5
P3	19-oxo-bufalin	0.6222	DB01708	Gamma-aminobutyric acid receptor subunit alpha-5	P31644	GBRA5_HUMAN	GABRA5
P3	19-oxo-bufalin	0.6	DB05314	Cytidine deaminase	P32320	CDD_HUMAN	CDA
P3	19-oxo-bufalin	0.6905	DB05087	Gamma-aminobutyric acid receptor subunit alpha-3	P34903	GBRA3_HUMAN	GABRA3
P3	19-oxo-bufalin	0.6222	DB01708	Gamma-aminobutyric acid receptor subunit alpha-3	P34903	GBRA3_HUMAN	GABRA3
P3	19-oxo-bufalin	0.6596	DB00486	Cannabinoid receptor 2	P34972	CNR2_HUMAN	CNR2
P3	19-oxo-bufalin	0.6364	DB00770	Prostaglandin E2 receptor EP1 subtype	P34995	PE2R1_HUMAN	PTGER1
P3	19-oxo-bufalin	0.6364	DB00917	Prostaglandin E2 receptor EP1 subtype	P34995	PE2R1_HUMAN	PTGER1
P3	19-oxo-bufalin	0.62	DB01088	Prostaglandin E2 receptor EP1 subtype	P34995	PE2R1_HUMAN	PTGER1
P3	19-oxo-bufalin	0.6102	DB01192	Mu-type opioid receptor	P35372	OPRM_HUMAN	OPRM1
P3	19-oxo-bufalin	0.6364	DB00917	Prostaglandin E2 receptor EP4 subtype	P35408	PE2R4_HUMAN	PTGER4
P3	19-oxo-bufalin	0.625	DB00929	Prostaglandin E2 receptor EP4 subtype	P35408	PE2R4_HUMAN	PTGER4
P3	19-oxo-bufalin	0.6667	DB02169	Serine/threonine-protein phosphatase PP1-gamma catalytic subunit	P36873	PP1G_HUMAN	PPP1CC
P3	19-oxo-bufalin	0.6102	DB01192	Delta-type opioid receptor	P41143	OPRD_HUMAN	OPRD1
P3	19-oxo-bufalin	0.6364	DB02056	Aldo-keto reductase family 1 member C3	P42330	AK1C3_HUMAN	AKR1C3
P3	19-oxo-bufalin	0.6154	DB07700	Aldo-keto reductase family 1 member C3	P42330	AK1C3_HUMAN	AKR1C3
P3	19-oxo-bufalin	0.6364	DB00917	Prostaglandin E2 receptor EP3 subtype	P43115	PE2R3_HUMAN	PTGER3
P3	19-oxo-bufalin	0.625	DB00929	Prostaglandin E2 receptor EP3 subtype	P43115	PE2R3_HUMAN	PTGER3
P3	19-oxo-bufalin	0.6364	DB00770	Prostaglandin E2 receptor EP2 subtype	P43116	PE2R2_HUMAN	PTGER2
P3	19-oxo-bufalin	0.6364	DB00917	Prostaglandin E2 receptor EP2 subtype	P43116	PE2R2_HUMAN	PTGER2
P3	19-oxo-bufalin	0.625	DB00929	Prostaglandin E2 receptor EP2 subtype	P43116	PE2R2_HUMAN	PTGER2
P3	19-oxo-bufalin	0.7021	DB00374	Prostacyclin receptor	P43119	PI2R_HUMAN	PTGIR
P3	19-oxo-bufalin	0.6739	DB01240	Prostacyclin receptor	P43119	PI2R_HUMAN	PTGIR
P3	19-oxo-bufalin	0.62	DB01088	Prostacyclin receptor	P43119	PI2R_HUMAN	PTGIR
P3	19-oxo-bufalin	0.6122	DB05229	Prostacyclin receptor	P43119	PI2R_HUMAN	PTGIR
P3	19-oxo-bufalin	0.6905	DB05087	Gamma-aminobutyric acid receptor subunit alpha-2	P47869	GBRA2_HUMAN	GABRA2
P3	19-oxo-bufalin	0.6222	DB01708	Gamma-aminobutyric acid receptor subunit alpha-2	P47869	GBRA2_HUMAN	GABRA2
P3	19-oxo-bufalin	0.6222	DB01708	Gamma-aminobutyric acid receptor subunit beta-2	P47870	GBRB2_HUMAN	GABRB2
P3	19-oxo-bufalin	0.6905	DB05087	Gamma-aminobutyric acid receptor subunit alpha-4	P48169	GBRA4_HUMAN	GABRA4
P3	19-oxo-bufalin	0.6222	DB01708	Gamma-aminobutyric acid receptor subunit alpha-4	P48169	GBRA4_HUMAN	GABRA4
P3	19-oxo-bufalin	0.7674	DB02659	Gastrotropin	P51161	FABP6_HUMAN	FABP6
P3	19-oxo-bufalin	0.6071	DB02691	Gastrotropin	P51161	FABP6_HUMAN	FABP6
P3	19-oxo-bufalin	0.7391	DB01046	Chloride channel protein 2	P51788	CLCN2_HUMAN	CLCN2
P3	19-oxo-bufalin	0.7073	DB07447	3-oxo-5-beta-steroid 4-dehydrogenase	P51857	AK1D1_HUMAN	AKR1D1
P3	19-oxo-bufalin	0.7674	DB01586	Aldo-keto reductase family 1 member C2	P52895	AK1C2_HUMAN	AKR1C2
P3	19-oxo-bufalin	0.6444	DB07768	Aldo-keto reductase family 1 member C2	P52895	AK1C2_HUMAN	AKR1C2
P3	19-oxo-bufalin	0.6	DB00421	Voltage-dependent L-type calcium channel subunit beta-3	P54284	CACB3_HUMAN	CACNB3
P3	19-oxo-bufalin	0.6	DB00421	Voltage-dependent calcium channel subunit alpha-2/delta-1	P54289	CA2D1_HUMAN	CACNA2D1
P3	19-oxo-bufalin	0.6207	DB01780	14-3-3 protein epsilon	P62258	1433E_HUMAN	YWHAE
P3	19-oxo-bufalin	0.7674	DB02659	Estrogen-related receptor gamma	P62508	ERR3_HUMAN	ESRRG
P3	19-oxo-bufalin	0.6667	DB00163	Serine/threonine-protein phosphatase 2A catalytic subunit beta isoform	P62714	PP2AB_HUMAN	PPP2CB
P3	19-oxo-bufalin	0.6939	DB02587	Guanine nucleotide-binding protein G(s) subunit alpha isoforms short	P63092	GNAS2_HUMAN	GNAS
P3	19-oxo-bufalin	0.6667	DB00163	Serine/threonine-protein phosphatase 2A catalytic subunit alpha isoform	P67775	PP2AA_HUMAN	PPP2CA
P3	19-oxo-bufalin	0.6222	DB01708	Gamma-aminobutyric acid receptor subunit epsilon	P78334	GBRE_HUMAN	GABRE
P3	19-oxo-bufalin	0.7317	DB07348	ADP-ribosylation factor 1	P84077	ARF1_HUMAN	ARF1
P3	19-oxo-bufalin	0.6	DB00421	Voltage-dependent N-type calcium channel subunit alpha-1B	Q00975	CAC1B_HUMAN	CACNA1B
P3	19-oxo-bufalin	0.6	DB00421	Voltage-dependent L-type calcium channel subunit alpha-1D	Q01668	CAC1D_HUMAN	CACNA1D
P3	19-oxo-bufalin	0.7674	DB02659	Cytochrome c oxidase subunit 6A2, mitochondrial	Q02221	CX6A2_HUMAN	COX6A2
P3	19-oxo-bufalin	0.6	DB00421	Voltage-dependent L-type calcium channel subunit beta-1	Q02641	CACB1_HUMAN	CACNB1
P3	19-oxo-bufalin	0.7021	DB00374	Peroxisome proliferator-activated receptor delta	Q03181	PPARD_HUMAN	PPARD
P3	19-oxo-bufalin	0.6444	DB07768	Aldo-keto reductase family 1 member C1	Q04828	AK1C1_HUMAN	AKR1C1
P3	19-oxo-bufalin	0.6222	DB01708	Glutamate receptor ionotropic, NMDA 1	Q05586	NMDZ1_HUMAN	GRIN1
P3	19-oxo-bufalin	0.6	DB00421	Voltage-dependent calcium channel gamma-1 subunit	Q06432	CCG1_HUMAN	CACNG1
P3	19-oxo-bufalin	0.7073	DB02854	Bile salt sulfotransferase	Q06520	ST2A1_HUMAN	SULT2A1
P3	19-oxo-bufalin	0.6222	DB01708	Bile salt sulfotransferase	Q06520	ST2A1_HUMAN	SULT2A1
P3	19-oxo-bufalin	0.6304	DB03849	cAMP-specific 3',5'-cyclic phosphodiesterase 4B	Q07343	PDE4B_HUMAN	PDE4B
P3	19-oxo-bufalin	0.62	DB01088	cAMP-specific 3',5'-cyclic phosphodiesterase 4B	Q07343	PDE4B_HUMAN	PDE4B
P3	19-oxo-bufalin	0.6222	DB01708	Peroxisome proliferator-activated receptor alpha	Q07869	PPARA_HUMAN	PPARA
P3	19-oxo-bufalin	0.6	DB00421	Voltage-dependent L-type calcium channel subunit beta-2	Q08289	CACB2_HUMAN	CACNB2
P3	19-oxo-bufalin	0.6939	DB02587	Adenylate cyclase type 2	Q08462	ADCY2_HUMAN	ADCY2
P3	19-oxo-bufalin	0.62	DB01088	cAMP-specific 3',5'-cyclic phosphodiesterase 4C	Q08493	PDE4C_HUMAN	PDE4C
P3	19-oxo-bufalin	0.6304	DB03849	cAMP-specific 3',5'-cyclic phosphodiesterase 4D	Q08499	PDE4D_HUMAN	PDE4D
P3	19-oxo-bufalin	0.62	DB01088	cAMP-specific 3',5'-cyclic phosphodiesterase 4D	Q08499	PDE4D_HUMAN	PDE4D
P3	19-oxo-bufalin	0.6222	DB01708	Glutamate receptor ionotropic, NMDA 2A	Q12879	NMDE1_HUMAN	GRIN2A
P3	19-oxo-bufalin	0.6222	DB01708	Glutamate receptor ionotropic, NMDA 2B	Q13224	NMDE2_HUMAN	GRIN2B
P3	19-oxo-bufalin	0.6	DB00421	Voltage-dependent L-type calcium channel subunit alpha-1S	Q13698	CAC1S_HUMAN	CACNA1S
P3	19-oxo-bufalin	0.6	DB00421	Voltage-dependent L-type calcium channel subunit alpha-1C	Q13936	CAC1C_HUMAN	CACNA1C
P3	19-oxo-bufalin	0.6364	DB07177	Prostaglandin reductase 1	Q14914	PTGR1_HUMAN	PTGR1
P3	19-oxo-bufalin	0.6222	DB01708	Glutamate receptor ionotropic, NMDA 2C	Q14957	NMDE3_HUMAN	GRIN2C
P3	19-oxo-bufalin	0.6222	DB01708	Nuclear receptor subfamily 1 group I member 3	Q14994	NR1I3_HUMAN	NR1I3
P3	19-oxo-bufalin	0.619	DB01889	Nuclear receptor subfamily 1 group I member 3	Q14994	NR1I3_HUMAN	NR1I3
P3	19-oxo-bufalin	0.7381	DB06871	Nuclear receptor coactivator 2	Q15596	NCOA2_HUMAN	NCOA2
P3	19-oxo-bufalin	0.6889	DB07678	Nuclear receptor coactivator 2	Q15596	NCOA2_HUMAN	NCOA2
P3	19-oxo-bufalin	0.6809	DB07087	Nuclear receptor coactivator 2	Q15596	NCOA2_HUMAN	NCOA2
P3	19-oxo-bufalin	0.6667	DB07707	Nuclear receptor coactivator 2	Q15596	NCOA2_HUMAN	NCOA2
P3	19-oxo-bufalin	0.6444	DB02998	Nuclear receptor coactivator 2	Q15596	NCOA2_HUMAN	NCOA2
P3	19-oxo-bufalin	0.7556	DB08220	Nuclear receptor coactivator 1	Q15788	NCOA1_HUMAN	NCOA1
P3	19-oxo-bufalin	0.64	DB04652	Nuclear receptor coactivator 1	Q15788	NCOA1_HUMAN	NCOA1
P3	19-oxo-bufalin	0.6905	DB05087	Gamma-aminobutyric acid receptor subunit alpha-6	Q16445	GBRA6_HUMAN	GABRA6
P3	19-oxo-bufalin	0.6222	DB01708	Gamma-aminobutyric acid receptor subunit alpha-6	Q16445	GBRA6_HUMAN	GABRA6
P3	19-oxo-bufalin	0.6739	DB01240	Prostacyclin synthase	Q16647	PTGIS_HUMAN	PTGIS
P3	19-oxo-bufalin	0.7111	DB02342	Hypoxia-inducible factor 1-alpha	Q16665	HIF1A_HUMAN	HIF1A
P3	19-oxo-bufalin	0.7111	DB02342	Cytochrome P450 1B1	Q16678	CP1B1_HUMAN	CYP1B1
P3	19-oxo-bufalin	0.7447	DB07815	Arylacetamide deacetylase-like 2	Q6P093	ADCL2_HUMAN	AADACL2
P3	19-oxo-bufalin	0.7021	DB07814	Arylacetamide deacetylase-like 2	Q6P093	ADCL2_HUMAN	AADACL2
P3	19-oxo-bufalin	0.6	DB00421	Voltage-dependent L-type calcium channel subunit beta-1	Q6TME4	Q6TME4_HUMAN	CACNB1
P3	19-oxo-bufalin	0.7674	DB02659	Ferrochelatase	Q7KZA3	Q7KZA3_HUMAN	DKFZp686P18130
P3	19-oxo-bufalin	0.7674	DB07690	Elongation factor Tu GTP-binding domain-containing protein 1	Q7Z2Z2	ETUD1_HUMAN	EFTUD1
P3	19-oxo-bufalin	0.6	DB00421	Voltage-dependent calcium channel subunit alpha-2/delta-3	Q8IZS8	CA2D3_HUMAN	CACNA2D3
P3	19-oxo-bufalin	0.6222	DB01708	Gamma-aminobutyric acid receptor subunit gamma-1	Q8N1C3	GBRG1_HUMAN	GABRG1
P3	19-oxo-bufalin	0.6364	DB07177	Prostaglandin reductase 2	Q8N8N7	PTGR2_HUMAN	PTGR2
P3	19-oxo-bufalin	0.7073	DB02854	Estradiol 17-beta-dehydrogenase 11	Q8NBQ5	DHB11_HUMAN	HSD17B11
P3	19-oxo-bufalin	0.6222	DB01708	Glutamate receptor ionotropic, NMDA 3A	Q8TCU5	NMD3A_HUMAN	GRIN3A
P3	19-oxo-bufalin	0.7561	DB00783	Estrogen receptor beta	Q92731	ESR2_HUMAN	ESR2
P3	19-oxo-bufalin	0.7442	DB04573	Estrogen receptor beta	Q92731	ESR2_HUMAN	ESR2
P3	19-oxo-bufalin	0.7442	DB07702	Estrogen receptor beta	Q92731	ESR2_HUMAN	ESR2
P3	19-oxo-bufalin	0.7073	DB03882	Estrogen receptor beta	Q92731	ESR2_HUMAN	ESR2
P3	19-oxo-bufalin	0.6222	DB01708	Estrogen receptor beta	Q92731	ESR2_HUMAN	ESR2
P3	19-oxo-bufalin	0.6154	DB01108	Estrogen receptor beta	Q92731	ESR2_HUMAN	ESR2
P3	19-oxo-bufalin	0.64	DB00227	Histone deacetylase 2	Q92769	HDAC2_HUMAN	HDAC2
P3	19-oxo-bufalin	0.7674	DB06777	Bile acid receptor	Q96RI1	NR1H4_HUMAN	NR1H4
P3	19-oxo-bufalin	0.7556	DB08220	Bile acid receptor	Q96RI1	NR1H4_HUMAN	NR1H4
P3	19-oxo-bufalin	0.7317	DB07348	Cytohesin-2	Q99418	CYH2_HUMAN	CYTH2
P3	19-oxo-bufalin	0.6222	DB01708	Sigma non-opioid intracellular receptor 1	Q99720	SGMR1_HUMAN	SIGMAR1
P3	19-oxo-bufalin	0.6222	DB01708	Gamma-aminobutyric acid receptor subunit gamma-3	Q99928	GBRG3_HUMAN	GABRG3
P3	19-oxo-bufalin	0.6279	DB00682	Vitamin K epoxide reductase complex subunit 1	Q9BQB6	VKOR1_HUMAN	VKORC1
P3	19-oxo-bufalin	0.7021	DB00374	P2Y purinoceptor 12	Q9H244	P2Y12_HUMAN	P2RY12
P3	19-oxo-bufalin	0.6739	DB01240	P2Y purinoceptor 12	Q9H244	P2Y12_HUMAN	P2RY12
P3	19-oxo-bufalin	0.6	DB00421	Polyprenol reductase	Q9H8P0	PORED_HUMAN	SRD5A3
P3	19-oxo-bufalin	0.7442	DB07702	Nuclear receptor coactivator 5	Q9HCD5	NCOA5_HUMAN	NCOA5
P3	19-oxo-bufalin	0.6	DB00421	Voltage-dependent calcium channel subunit alpha-2/delta-2	Q9NY47	CA2D2_HUMAN	CACNA2D2
P3	19-oxo-bufalin	0.6	DB00421	Voltage-dependent T-type calcium channel subunit alpha-1I	Q9P0X4	CAC1I_HUMAN	CACNA1I
P3	19-oxo-bufalin	0.6667	DB00163	SEC14-like protein 4	Q9UDX3	S14L4_HUMAN	SEC14L4
P3	19-oxo-bufalin	0.6667	DB00163	SEC14-like protein 3	Q9UDX4	S14L3_HUMAN	SEC14L3
P3	19-oxo-bufalin	0.6222	DB01708	Gamma-aminobutyric acid receptor subunit theta	Q9UN88	GBRT_HUMAN	GABRQ
P4	Desacetylcinobufagin	0.68	DB02859	Acetyl-CoA carboxylase 2	O00763	ACACB_HUMAN	ACACB
P4	Desacetylcinobufagin	0.6471	DB02205	Glyceraldehyde-3-phosphate dehydrogenase, testis-specific	O14556	G3PT_HUMAN	GAPDHS
P4	Desacetylcinobufagin	0.6	DB01497	E3 ubiquitin-protein ligase TRIM13	O60858	TRI13_HUMAN	TRIM13
P4	Desacetylcinobufagin	0.6	DB01548	E3 ubiquitin-protein ligase TRIM13	O60858	TRI13_HUMAN	TRIM13
P4	Desacetylcinobufagin	0.6	DB01565	E3 ubiquitin-protein ligase TRIM13	O60858	TRI13_HUMAN	TRIM13
P4	Desacetylcinobufagin	0.6481	DB00466	Glycine receptor subunit alpha-3	O75311	GLRA3_HUMAN	GLRA3
P4	Desacetylcinobufagin	0.6393	DB00602	Glycine receptor subunit alpha-3	O75311	GLRA3_HUMAN	GLRA3
P4	Desacetylcinobufagin	0.6739	DB00783	Nuclear receptor subfamily 1 group I member 2	O75469	NR1I2_HUMAN	NR1I2
P4	Desacetylcinobufagin	0.6596	DB00977	Nuclear receptor subfamily 1 group I member 2	O75469	NR1I2_HUMAN	NR1I2
P4	Desacetylcinobufagin	0.6327	DB00163	Nuclear receptor subfamily 1 group I member 2	O75469	NR1I2_HUMAN	NR1I2
P4	Desacetylcinobufagin	0.6327	DB00163	SEC14-like protein 2	O76054	S14L2_HUMAN	SEC14L2
P4	Desacetylcinobufagin	0.6923	DB02587	Adenylate cyclase type 5	O95622	ADCY5_HUMAN	ADCY5
P4	Desacetylcinobufagin	0.7234	DB02659	Alcohol dehydrogenase 1C	P00326	ADH1G_HUMAN	ADH1C
P4	Desacetylcinobufagin	0.7234	DB02659	Cytochrome c oxidase subunit 1	P00395	COX1_HUMAN	MT-CO1
P4	Desacetylcinobufagin	0.7234	DB02659	Cytochrome c oxidase subunit 2	P00403	COX2_HUMAN	MT-CO2
P4	Desacetylcinobufagin	0.7234	DB02659	Cytochrome c oxidase subunit 3	P00414	COX3_HUMAN	MT-CO3
P4	Desacetylcinobufagin	0.6182	DB01998	Alpha-1-antitrypsin	P01009	A1AT_HUMAN	SERPINA1
P4	Desacetylcinobufagin	0.6	DB01497	Pro-opiomelanocortin	P01189	COLI_HUMAN	POMC
P4	Desacetylcinobufagin	0.6	DB01565	Pro-opiomelanocortin	P01189	COLI_HUMAN	POMC
P4	Desacetylcinobufagin	0.6667	DB02854	Ig gamma-2 chain C region	P01859	IGHG2_HUMAN	IGHG2
P4	Desacetylcinobufagin	0.6531	DB08510	Ig gamma-2 chain C region	P01859	IGHG2_HUMAN	IGHG2
P4	Desacetylcinobufagin	0.6038	DB08547	Ig gamma-2 chain C region	P01859	IGHG2_HUMAN	IGHG2
P4	Desacetylcinobufagin	0.6	DB01651	Serum amyloid P-component	P02743	SAMP_HUMAN	APCS
P4	Desacetylcinobufagin	0.629	DB00497	Alpha-1-acid glycoprotein 1	P02763	A1AG1_HUMAN	ORM1
P4	Desacetylcinobufagin	0.7115	DB01108	Estrogen receptor	P03372	ESR1_HUMAN	ESR1
P4	Desacetylcinobufagin	0.7021	DB04573	Estrogen receptor	P03372	ESR1_HUMAN	ESR1
P4	Desacetylcinobufagin	0.6957	DB06871	Estrogen receptor	P03372	ESR1_HUMAN	ESR1
P4	Desacetylcinobufagin	0.68	DB07087	Estrogen receptor	P03372	ESR1_HUMAN	ESR1
P4	Desacetylcinobufagin	0.6739	DB00783	Estrogen receptor	P03372	ESR1_HUMAN	ESR1
P4	Desacetylcinobufagin	0.6596	DB00977	Estrogen receptor	P03372	ESR1_HUMAN	ESR1
P4	Desacetylcinobufagin	0.6531	DB07678	Estrogen receptor	P03372	ESR1_HUMAN	ESR1
P4	Desacetylcinobufagin	0.6346	DB07707	Estrogen receptor	P03372	ESR1_HUMAN	ESR1
P4	Desacetylcinobufagin	0.6327	DB01357	Estrogen receptor	P03372	ESR1_HUMAN	ESR1
P4	Desacetylcinobufagin	0.6304	DB00655	Estrogen receptor	P03372	ESR1_HUMAN	ESR1
P4	Desacetylcinobufagin	0.625	DB04575	Estrogen receptor	P03372	ESR1_HUMAN	ESR1
P4	Desacetylcinobufagin	0.6364	DB00641	3-hydroxy-3-methylglutaryl-coenzyme A reductase	P04035	HMDH_HUMAN	HMGCR
P4	Desacetylcinobufagin	0.6111	DB00227	3-hydroxy-3-methylglutaryl-coenzyme A reductase	P04035	HMDH_HUMAN	HMGCR
P4	Desacetylcinobufagin	0.7234	DB02659	Phospholipase A2	P04054	PA21B_HUMAN	PLA2G1B
P4	Desacetylcinobufagin	0.6364	DB00741	Annexin A1	P04083	ANXA1_HUMAN	ANXA1
P4	Desacetylcinobufagin	0.6167	DB00288	Annexin A1	P04083	ANXA1_HUMAN	ANXA1
P4	Desacetylcinobufagin	0.6667	DB01410	Glucocorticoid receptor	P04150	GCR_HUMAN	NR3C1
P4	Desacetylcinobufagin	0.6667	DB01260	Glucocorticoid receptor	P04150	GCR_HUMAN	NR3C1
P4	Desacetylcinobufagin	0.6667	DB01222	Glucocorticoid receptor	P04150	GCR_HUMAN	NR3C1
P4	Desacetylcinobufagin	0.6364	DB01380	Glucocorticoid receptor	P04150	GCR_HUMAN	NR3C1
P4	Desacetylcinobufagin	0.6364	DB00860	Glucocorticoid receptor	P04150	GCR_HUMAN	NR3C1
P4	Desacetylcinobufagin	0.6364	DB00741	Glucocorticoid receptor	P04150	GCR_HUMAN	NR3C1
P4	Desacetylcinobufagin	0.6364	DB00635	Glucocorticoid receptor	P04150	GCR_HUMAN	NR3C1
P4	Desacetylcinobufagin	0.625	DB00959	Glucocorticoid receptor	P04150	GCR_HUMAN	NR3C1
P4	Desacetylcinobufagin	0.623	DB00846	Glucocorticoid receptor	P04150	GCR_HUMAN	NR3C1
P4	Desacetylcinobufagin	0.6182	DB00324	Glucocorticoid receptor	P04150	GCR_HUMAN	NR3C1
P4	Desacetylcinobufagin	0.6167	DB00288	Glucocorticoid receptor	P04150	GCR_HUMAN	NR3C1
P4	Desacetylcinobufagin	0.614	DB00873	Glucocorticoid receptor	P04150	GCR_HUMAN	NR3C1
P4	Desacetylcinobufagin	0.6333	DB03010	Tubulin beta-4A chain	P04350	TBB4A_HUMAN	TUBB4A
P4	Desacetylcinobufagin	0.7083	DB02342	Cytochrome P450 1A1	P04798	CP1A1_HUMAN	CYP1A1
P4	Desacetylcinobufagin	0.7593	DB00511	Sodium/potassium-transporting ATPase subunit alpha-1	P05023	AT1A1_HUMAN	ATP1A1
P4	Desacetylcinobufagin	0.7593	DB01396	Sodium/potassium-transporting ATPase subunit alpha-1	P05023	AT1A1_HUMAN	ATP1A1
P4	Desacetylcinobufagin	0.7455	DB00390	Sodium/potassium-transporting ATPase subunit alpha-1	P05023	AT1A1_HUMAN	ATP1A1
P4	Desacetylcinobufagin	0.7193	DB01092	Sodium/potassium-transporting ATPase subunit alpha-1	P05023	AT1A1_HUMAN	ATP1A1
P4	Desacetylcinobufagin	0.7069	DB01078	Sodium/potassium-transporting ATPase subunit alpha-1	P05023	AT1A1_HUMAN	ATP1A1
P4	Desacetylcinobufagin	0.6364	DB00641	Integrin beta-2	P05107	ITB2_HUMAN	ITGB2
P4	Desacetylcinobufagin	0.6327	DB00163	Protein kinase C beta type	P05771	KPCB_HUMAN	PRKCB
P4	Desacetylcinobufagin	0.6122	DB02998	Progesterone receptor	P06401	PRGR_HUMAN	PGR
P4	Desacetylcinobufagin	0.6333	DB03010	Tubulin beta chain	P07437	TBB5_HUMAN	TUBB
P4	Desacetylcinobufagin	0.62	DB07908	Profilin-1	P07737	PROF1_HUMAN	PFN1
P4	Desacetylcinobufagin	0.6111	DB04652	Mineralocorticoid receptor	P08235	MCR_HUMAN	NR3C2
P4	Desacetylcinobufagin	0.6	DB00700	Mineralocorticoid receptor	P08235	MCR_HUMAN	NR3C2
P4	Desacetylcinobufagin	0.7234	DB02659	Cytochrome c oxidase subunit 6C	P09669	COX6C_HUMAN	COX6C
P4	Desacetylcinobufagin	0.6327	DB00163	Arachidonate 5-lipoxygenase	P09917	LOX5_HUMAN	ALOX5
P4	Desacetylcinobufagin	0.7234	DB02659	Cytochrome c oxidase subunit 8A, mitochondrial	P10176	COX8A_HUMAN	COX8A
P4	Desacetylcinobufagin	0.7292	DB00621	Androgen receptor	P10275	ANDR_HUMAN	AR
P4	Desacetylcinobufagin	0.6667	DB02901	Androgen receptor	P10275	ANDR_HUMAN	AR
P4	Desacetylcinobufagin	0.6522	DB01481	Androgen receptor	P10275	ANDR_HUMAN	AR
P4	Desacetylcinobufagin	0.6522	DB00858	Androgen receptor	P10275	ANDR_HUMAN	AR
P4	Desacetylcinobufagin	0.6122	DB00624	Androgen receptor	P10275	ANDR_HUMAN	AR
P4	Desacetylcinobufagin	0.6122	DB02998	Androgen receptor	P10275	ANDR_HUMAN	AR
P4	Desacetylcinobufagin	0.6122	DB01541	Androgen receptor	P10275	ANDR_HUMAN	AR
P4	Desacetylcinobufagin	0.6	DB06710	Androgen receptor	P10275	ANDR_HUMAN	AR
P4	Desacetylcinobufagin	0.6	DB01564	Androgen receptor	P10275	ANDR_HUMAN	AR
P4	Desacetylcinobufagin	0.7234	DB02659	Cytochrome c oxidase subunit 5B, mitochondrial	P10606	COX5B_HUMAN	COX5B
P4	Desacetylcinobufagin	0.6207	DB01177	DNA topoisomerase 2-alpha	P11388	TOP2A_HUMAN	TOP2A
P4	Desacetylcinobufagin	0.6	DB00773	DNA topoisomerase 2-alpha	P11388	TOP2A_HUMAN	TOP2A
P4	Desacetylcinobufagin	0.6	DB00694	DNA topoisomerase 2-alpha	P11388	TOP2A_HUMAN	TOP2A
P4	Desacetylcinobufagin	0.6122	DB05107	Glucose-6-phosphate 1-dehydrogenase	P11413	G6PD_HUMAN	G6PD
P4	Desacetylcinobufagin	0.66	DB02300	Vitamin D3 receptor	P11473	VDR_HUMAN	VDR
P4	Desacetylcinobufagin	0.6078	DB00910	Vitamin D3 receptor	P11473	VDR_HUMAN	VDR
P4	Desacetylcinobufagin	0.6038	DB00136	Vitamin D3 receptor	P11473	VDR_HUMAN	VDR
P4	Desacetylcinobufagin	0.7083	DB02342	Aromatase	P11511	CP19A_HUMAN	CYP19A1
P4	Desacetylcinobufagin	0.6316	DB01024	Inosine-5'-monophosphate dehydrogenase 2	P12268	IMDH2_HUMAN	IMPDH2
P4	Desacetylcinobufagin	0.7234	DB02659	Cytochrome c oxidase subunit 4 isoform 1, mitochondrial	P13073	COX41_HUMAN	COX4I1
P4	Desacetylcinobufagin	0.7115	DB01108	3 beta-hydroxysteroid dehydrogenase/Delta 5-->4-isomerase type 1	P14060	3BHS1_HUMAN	HSD3B1
P4	Desacetylcinobufagin	0.6667	DB02901	Estradiol 17-beta-dehydrogenase 1	P14061	DHB1_HUMAN	HSD17B1
P4	Desacetylcinobufagin	0.7234	DB02659	Cytochrome c oxidase subunit 6B1	P14854	CX6B1_HUMAN	COX6B1
P4	Desacetylcinobufagin	0.6522	DB05087	Gamma-aminobutyric acid receptor subunit alpha-1	P14867	GBRA1_HUMAN	GABRA1
P4	Desacetylcinobufagin	0.6481	DB00466	Gamma-aminobutyric acid receptor subunit alpha-1	P14867	GBRA1_HUMAN	GABRA1
P4	Desacetylcinobufagin	0.7234	DB02659	Cytochrome c oxidase subunit 7C, mitochondrial	P15954	COX7C_HUMAN	COX7C
P4	Desacetylcinobufagin	0.6296	DB07633	Histo-blood group ABO system transferase	P16442	BGAT_HUMAN	ABO
P4	Desacetylcinobufagin	0.6327	DB00163	Protein kinase C alpha type	P17252	KPCA_HUMAN	PRKCA
P4	Desacetylcinobufagin	0.629	DB00497	Alpha-1-acid glycoprotein 2	P19652	A1AG2_HUMAN	ORM2
P4	Desacetylcinobufagin	0.614	DB00749	Retinoic acid receptor RXR-alpha	P19793	RXRA_HUMAN	RXRA
P4	Desacetylcinobufagin	0.7234	DB02659	Cytochrome c oxidase subunit 5A, mitochondrial	P20674	COX5A_HUMAN	COX5A
P4	Desacetylcinobufagin	0.6111	DB00227	Integrin alpha-L	P20701	ITAL_HUMAN	ITGAL
P4	Desacetylcinobufagin	0.6316	DB01024	Inosine-5'-monophosphate dehydrogenase 1	P20839	IMDH1_HUMAN	IMPDH1
P4	Desacetylcinobufagin	0.66	DB00486	Cannabinoid receptor 1	P21554	CNR1_HUMAN	CNR1
P4	Desacetylcinobufagin	0.7083	DB02342	Catechol O-methyltransferase	P21964	COMT_HUMAN	COMT
P4	Desacetylcinobufagin	0.7234	DB02659	Ferrochelatase, mitochondrial	P22830	HEMH_HUMAN	FECH
P4	Desacetylcinobufagin	0.7234	DB02659	Liver carboxylesterase 1	P23141	EST1_HUMAN	CES1
P4	Desacetylcinobufagin	0.66	DB08224	Liver carboxylesterase 1	P23141	EST1_HUMAN	CES1
P4	Desacetylcinobufagin	0.614	DB00749	Prostaglandin G/H synthase 1	P23219	PGH1_HUMAN	PTGS1
P4	Desacetylcinobufagin	0.6481	DB00466	Glycine receptor subunit alpha-2	P23416	GLRA2_HUMAN	GLRA2
P4	Desacetylcinobufagin	0.6327	DB00163	Diacylglycerol kinase alpha	P23743	DGKA_HUMAN	DGKA
P4	Desacetylcinobufagin	0.6481	DB00466	Gamma-aminobutyric acid receptor subunit rho-1	P24046	GBRR1_HUMAN	GABRR1
P4	Desacetylcinobufagin	0.7234	DB02659	Cytochrome c oxidase subunit 7A1, mitochondrial	P24310	CX7A1_HUMAN	COX7A1
P4	Desacetylcinobufagin	0.7234	DB02659	Cytochrome c oxidase subunit 7B, mitochondrial	P24311	COX7B_HUMAN	COX7B
P4	Desacetylcinobufagin	0.7115	DB01108	3 beta-hydroxysteroid dehydrogenase/Delta 5-->4-isomerase type 2	P26439	3BHS2_HUMAN	HSD3B2
P4	Desacetylcinobufagin	0.6102	DB08059	Phosphatidylinositol 3-kinase regulatory subunit alpha	P27986	P85A_HUMAN	PIK3R1
P4	Desacetylcinobufagin	0.6393	DB00602	Gamma-aminobutyric acid receptor subunit beta-3	P28472	GBRB3_HUMAN	GABRB3
P4	Desacetylcinobufagin	0.6275	DB07905	Mitogen-activated protein kinase 1	P28482	MK01_HUMAN	MAPK1
P4	Desacetylcinobufagin	0.6364	DB00635	Corticosteroid 11-beta-dehydrogenase isozyme 1	P28845	DHI1_HUMAN	HSD11B1
P4	Desacetylcinobufagin	0.6111	DB02329	Corticosteroid 11-beta-dehydrogenase isozyme 1	P28845	DHI1_HUMAN	HSD11B1
P4	Desacetylcinobufagin	0.6111	DB04652	Corticosteroid 11-beta-dehydrogenase isozyme 1	P28845	DHI1_HUMAN	HSD11B1
P4	Desacetylcinobufagin	0.6522	DB05087	Gamma-aminobutyric acid receptor subunit alpha-5	P31644	GBRA5_HUMAN	GABRA5
P4	Desacetylcinobufagin	0.6038	DB05314	Cytidine deaminase	P32320	CDD_HUMAN	CDA
P4	Desacetylcinobufagin	0.6522	DB05087	Gamma-aminobutyric acid receptor subunit alpha-3	P34903	GBRA3_HUMAN	GABRA3
P4	Desacetylcinobufagin	0.66	DB00486	Cannabinoid receptor 2	P34972	CNR2_HUMAN	CNR2
P4	Desacetylcinobufagin	0.614	DB00749	Prostaglandin G/H synthase 2	P35354	PGH2_HUMAN	PTGS2
P4	Desacetylcinobufagin	0.6393	DB01192	Mu-type opioid receptor	P35372	OPRM_HUMAN	OPRM1
P4	Desacetylcinobufagin	0.629	DB00497	Mu-type opioid receptor	P35372	OPRM_HUMAN	OPRM1
P4	Desacetylcinobufagin	0.6154	DB06800	Mu-type opioid receptor	P35372	OPRM_HUMAN	OPRM1
P4	Desacetylcinobufagin	0.6	DB01497	Mu-type opioid receptor	P35372	OPRM_HUMAN	OPRM1
P4	Desacetylcinobufagin	0.6	DB01548	Mu-type opioid receptor	P35372	OPRM_HUMAN	OPRM1
P4	Desacetylcinobufagin	0.6	DB01565	Mu-type opioid receptor	P35372	OPRM_HUMAN	OPRM1
P4	Desacetylcinobufagin	0.6	DB00921	Mu-type opioid receptor	P35372	OPRM_HUMAN	OPRM1
P4	Desacetylcinobufagin	0.7273	DB02169	Serine/threonine-protein phosphatase PP1-gamma catalytic subunit	P36873	PP1G_HUMAN	PPP1CC
P4	Desacetylcinobufagin	0.6393	DB01192	Delta-type opioid receptor	P41143	OPRD_HUMAN	OPRD1
P4	Desacetylcinobufagin	0.629	DB00497	Delta-type opioid receptor	P41143	OPRD_HUMAN	OPRD1
P4	Desacetylcinobufagin	0.6	DB01497	Delta-type opioid receptor	P41143	OPRD_HUMAN	OPRD1
P4	Desacetylcinobufagin	0.6	DB01548	Delta-type opioid receptor	P41143	OPRD_HUMAN	OPRD1
P4	Desacetylcinobufagin	0.6	DB01565	Delta-type opioid receptor	P41143	OPRD_HUMAN	OPRD1
P4	Desacetylcinobufagin	0.6	DB00921	Delta-type opioid receptor	P41143	OPRD_HUMAN	OPRD1
P4	Desacetylcinobufagin	0.629	DB00497	Kappa-type opioid receptor	P41145	OPRK_HUMAN	OPRK1
P4	Desacetylcinobufagin	0.6154	DB06800	Kappa-type opioid receptor	P41145	OPRK_HUMAN	OPRK1
P4	Desacetylcinobufagin	0.6	DB01497	Kappa-type opioid receptor	P41145	OPRK_HUMAN	OPRK1
P4	Desacetylcinobufagin	0.6	DB01548	Kappa-type opioid receptor	P41145	OPRK_HUMAN	OPRK1
P4	Desacetylcinobufagin	0.6	DB01565	Kappa-type opioid receptor	P41145	OPRK_HUMAN	OPRK1
P4	Desacetylcinobufagin	0.6	DB00921	Kappa-type opioid receptor	P41145	OPRK_HUMAN	OPRK1
P4	Desacetylcinobufagin	0.6	DB01497	Nociceptin receptor	P41146	OPRX_HUMAN	OPRL1
P4	Desacetylcinobufagin	0.6102	DB08059	Phosphatidylinositol 4,5-bisphosphate 3-kinase catalytic subunit alpha isoform	P42336	PK3CA_HUMAN	PIK3CA
P4	Desacetylcinobufagin	0.6667	DB00374	Prostacyclin receptor	P43119	PI2R_HUMAN	PTGIR
P4	Desacetylcinobufagin	0.64	DB01240	Prostacyclin receptor	P43119	PI2R_HUMAN	PTGIR
P4	Desacetylcinobufagin	0.6154	DB05229	Prostacyclin receptor	P43119	PI2R_HUMAN	PTGIR
P4	Desacetylcinobufagin	0.6522	DB05087	Gamma-aminobutyric acid receptor subunit alpha-2	P47869	GBRA2_HUMAN	GABRA2
P4	Desacetylcinobufagin	0.6522	DB05087	Gamma-aminobutyric acid receptor subunit alpha-4	P48169	GBRA4_HUMAN	GABRA4
P4	Desacetylcinobufagin	0.6102	DB08059	Phosphatidylinositol 4,5-bisphosphate 3-kinase catalytic subunit gamma isoform	P48736	PK3CG_HUMAN	PIK3CG
P4	Desacetylcinobufagin	0.6296	DB02640	Methionine aminopeptidase 2	P50579	MAP2_HUMAN	METAP2
P4	Desacetylcinobufagin	0.6296	DB04324	Methionine aminopeptidase 2	P50579	MAP2_HUMAN	METAP2
P4	Desacetylcinobufagin	0.7234	DB02659	Gastrotropin	P51161	FABP6_HUMAN	FABP6
P4	Desacetylcinobufagin	0.6667	DB01046	Chloride channel protein 2	P51788	CLCN2_HUMAN	CLCN2
P4	Desacetylcinobufagin	0.6667	DB07447	3-oxo-5-beta-steroid 4-dehydrogenase	P51857	AK1D1_HUMAN	AKR1D1
P4	Desacetylcinobufagin	0.7234	DB01586	Aldo-keto reductase family 1 member C2	P52895	AK1C2_HUMAN	AKR1C2
P4	Desacetylcinobufagin	0.6122	DB07768	Aldo-keto reductase family 1 member C2	P52895	AK1C2_HUMAN	AKR1C2
P4	Desacetylcinobufagin	0.6102	DB08059	Serine/threonine-protein kinase PLK1	P53350	PLK1_HUMAN	PLK1
P4	Desacetylcinobufagin	0.6296	DB04324	Methionine aminopeptidase 1	P53582	MAP11_HUMAN	METAP1
P4	Desacetylcinobufagin	0.623	DB01780	14-3-3 protein epsilon	P62258	1433E_HUMAN	YWHAE
P4	Desacetylcinobufagin	0.7234	DB02659	Estrogen-related receptor gamma	P62508	ERR3_HUMAN	ESRRG
P4	Desacetylcinobufagin	0.6327	DB00163	Serine/threonine-protein phosphatase 2A catalytic subunit beta isoform	P62714	PP2AB_HUMAN	PPP2CB
P4	Desacetylcinobufagin	0.6923	DB02587	Guanine nucleotide-binding protein G(s) subunit alpha isoforms short	P63092	GNAS2_HUMAN	GNAS
P4	Desacetylcinobufagin	0.6327	DB00163	Serine/threonine-protein phosphatase 2A catalytic subunit alpha isoform	P67775	PP2AA_HUMAN	PPP2CA
P4	Desacetylcinobufagin	0.6333	DB03010	Tubulin alpha-1B chain	P68363	TBA1B_HUMAN	TUBA1B
P4	Desacetylcinobufagin	0.6333	DB03010	Tubulin alpha-4A chain	P68366	TBA4A_HUMAN	TUBA4A
P4	Desacetylcinobufagin	0.6333	DB03010	Tubulin beta-4B chain	P68371	TBB4B_HUMAN	TUBB4B
P4	Desacetylcinobufagin	0.6522	DB07348	ADP-ribosylation factor 1	P84077	ARF1_HUMAN	ARF1
P4	Desacetylcinobufagin	0.7234	DB02659	Cytochrome c oxidase subunit 6A2, mitochondrial	Q02221	CX6A2_HUMAN	COX6A2
P4	Desacetylcinobufagin	0.6	DB00773	DNA topoisomerase 2-beta	Q02880	TOP2B_HUMAN	TOP2B
P4	Desacetylcinobufagin	0.6	DB00694	DNA topoisomerase 2-beta	Q02880	TOP2B_HUMAN	TOP2B
P4	Desacetylcinobufagin	0.6667	DB00374	Peroxisome proliferator-activated receptor delta	Q03181	PPARD_HUMAN	PPARD
P4	Desacetylcinobufagin	0.6122	DB07768	Aldo-keto reductase family 1 member C1	Q04828	AK1C1_HUMAN	AKR1C1
P4	Desacetylcinobufagin	0.6667	DB02854	Bile salt sulfotransferase	Q06520	ST2A1_HUMAN	SULT2A1
P4	Desacetylcinobufagin	0.6	DB03849	cAMP-specific 3',5'-cyclic phosphodiesterase 4B	Q07343	PDE4B_HUMAN	PDE4B
P4	Desacetylcinobufagin	0.6923	DB02587	Adenylate cyclase type 2	Q08462	ADCY2_HUMAN	ADCY2
P4	Desacetylcinobufagin	0.6	DB03849	cAMP-specific 3',5'-cyclic phosphodiesterase 4D	Q08499	PDE4D_HUMAN	PDE4D
P4	Desacetylcinobufagin	0.6333	DB03010	Tubulin beta-3 chain	Q13509	TBB3_HUMAN	TUBB3
P4	Desacetylcinobufagin	0.6333	DB03010	Tubulin alpha-3C/D chain	Q13748	TBA3C_HUMAN	TUBA3C
P4	Desacetylcinobufagin	0.6957	DB06871	Nuclear receptor coactivator 2	Q15596	NCOA2_HUMAN	NCOA2
P4	Desacetylcinobufagin	0.68	DB07087	Nuclear receptor coactivator 2	Q15596	NCOA2_HUMAN	NCOA2
P4	Desacetylcinobufagin	0.6531	DB07678	Nuclear receptor coactivator 2	Q15596	NCOA2_HUMAN	NCOA2
P4	Desacetylcinobufagin	0.6346	DB07707	Nuclear receptor coactivator 2	Q15596	NCOA2_HUMAN	NCOA2
P4	Desacetylcinobufagin	0.6122	DB02998	Nuclear receptor coactivator 2	Q15596	NCOA2_HUMAN	NCOA2
P4	Desacetylcinobufagin	0.68	DB08220	Nuclear receptor coactivator 1	Q15788	NCOA1_HUMAN	NCOA1
P4	Desacetylcinobufagin	0.6111	DB04652	Nuclear receptor coactivator 1	Q15788	NCOA1_HUMAN	NCOA1
P4	Desacetylcinobufagin	0.6522	DB05087	Gamma-aminobutyric acid receptor subunit alpha-6	Q16445	GBRA6_HUMAN	GABRA6
P4	Desacetylcinobufagin	0.64	DB01240	Prostacyclin synthase	Q16647	PTGIS_HUMAN	PTGIS
P4	Desacetylcinobufagin	0.7083	DB02342	Hypoxia-inducible factor 1-alpha	Q16665	HIF1A_HUMAN	HIF1A
P4	Desacetylcinobufagin	0.7083	DB02342	Cytochrome P450 1B1	Q16678	CP1B1_HUMAN	CYP1B1
P4	Desacetylcinobufagin	0.6731	DB07815	Arylacetamide deacetylase-like 2	Q6P093	ADCL2_HUMAN	AADACL2
P4	Desacetylcinobufagin	0.6346	DB07814	Arylacetamide deacetylase-like 2	Q6P093	ADCL2_HUMAN	AADACL2
P4	Desacetylcinobufagin	0.6333	DB03010	Tubulin alpha-1A chain	Q71U36	TBA1A_HUMAN	TUBA1A
P4	Desacetylcinobufagin	0.7234	DB02659	Ferrochelatase	Q7KZA3	Q7KZA3_HUMAN	DKFZp686P18130
P4	Desacetylcinobufagin	0.7234	DB07690	Elongation factor Tu GTP-binding domain-containing protein 1	Q7Z2Z2	ETUD1_HUMAN	EFTUD1
P4	Desacetylcinobufagin	0.6667	DB02854	Estradiol 17-beta-dehydrogenase 11	Q8NBQ5	DHB11_HUMAN	HSD17B11
P4	Desacetylcinobufagin	0.7115	DB01108	Estrogen receptor beta	Q92731	ESR2_HUMAN	ESR2
P4	Desacetylcinobufagin	0.7021	DB04573	Estrogen receptor beta	Q92731	ESR2_HUMAN	ESR2
P4	Desacetylcinobufagin	0.7021	DB07702	Estrogen receptor beta	Q92731	ESR2_HUMAN	ESR2
P4	Desacetylcinobufagin	0.6739	DB00783	Estrogen receptor beta	Q92731	ESR2_HUMAN	ESR2
P4	Desacetylcinobufagin	0.6667	DB03882	Estrogen receptor beta	Q92731	ESR2_HUMAN	ESR2
P4	Desacetylcinobufagin	0.6111	DB00227	Histone deacetylase 2	Q92769	HDAC2_HUMAN	HDAC2
P4	Desacetylcinobufagin	0.7234	DB06777	Bile acid receptor	Q96RI1	NR1H4_HUMAN	NR1H4
P4	Desacetylcinobufagin	0.68	DB08220	Bile acid receptor	Q96RI1	NR1H4_HUMAN	NR1H4
P4	Desacetylcinobufagin	0.6522	DB07348	Cytohesin-2	Q99418	CYH2_HUMAN	CYTH2
P4	Desacetylcinobufagin	0.6333	DB03010	Tubulin alpha-1C chain	Q9BQE3	TBA1C_HUMAN	TUBA1C
P4	Desacetylcinobufagin	0.6667	DB00374	P2Y purinoceptor 12	Q9H244	P2Y12_HUMAN	P2RY12
P4	Desacetylcinobufagin	0.64	DB01240	P2Y purinoceptor 12	Q9H244	P2Y12_HUMAN	P2RY12
P4	Desacetylcinobufagin	0.6333	DB03010	Tubulin beta-1 chain	Q9H4B7	TBB1_HUMAN	TUBB1
P4	Desacetylcinobufagin	0.7021	DB07702	Nuclear receptor coactivator 5	Q9HCD5	NCOA5_HUMAN	NCOA5
P4	Desacetylcinobufagin	0.6333	DB03010	Tubulin alpha-8 chain	Q9NY65	TBA8_HUMAN	TUBA8
P4	Desacetylcinobufagin	0.6327	DB00163	SEC14-like protein 4	Q9UDX3	S14L4_HUMAN	SEC14L4
P4	Desacetylcinobufagin	0.6327	DB00163	SEC14-like protein 3	Q9UDX4	S14L3_HUMAN	SEC14L3
M4	5β-Hydroxyresibufogenin	0.68	DB02859	Acetyl-CoA carboxylase 2	O00763	ACACB_HUMAN	ACACB
M4	5β-Hydroxyresibufogenin	0.6154	DB02205	Glyceraldehyde-3-phosphate dehydrogenase, testis-specific	O14556	G3PT_HUMAN	GAPDHS
M4	5β-Hydroxyresibufogenin	0.6393	DB00602	Glycine receptor subunit alpha-3	O75311	GLRA3_HUMAN	GLRA3
M4	5β-Hydroxyresibufogenin	0.6182	DB00466	Glycine receptor subunit alpha-3	O75311	GLRA3_HUMAN	GLRA3
M4	5β-Hydroxyresibufogenin	0.6739	DB00783	Nuclear receptor subfamily 1 group I member 2	O75469	NR1I2_HUMAN	NR1I2
M4	5β-Hydroxyresibufogenin	0.6596	DB00977	Nuclear receptor subfamily 1 group I member 2	O75469	NR1I2_HUMAN	NR1I2
M4	5β-Hydroxyresibufogenin	0.6327	DB00163	Nuclear receptor subfamily 1 group I member 2	O75469	NR1I2_HUMAN	NR1I2
M4	5β-Hydroxyresibufogenin	0.6327	DB00163	SEC14-like protein 2	O76054	S14L2_HUMAN	SEC14L2
M4	5β-Hydroxyresibufogenin	0.6923	DB02587	Adenylate cyclase type 5	O95622	ADCY5_HUMAN	ADCY5
M4	5β-Hydroxyresibufogenin	0.7234	DB02659	Alcohol dehydrogenase 1C	P00326	ADH1G_HUMAN	ADH1C
M4	5β-Hydroxyresibufogenin	0.7234	DB02659	Cytochrome c oxidase subunit 1	P00395	COX1_HUMAN	MT-CO1
M4	5β-Hydroxyresibufogenin	0.7234	DB02659	Cytochrome c oxidase subunit 2	P00403	COX2_HUMAN	MT-CO2
M4	5β-Hydroxyresibufogenin	0.7234	DB02659	Cytochrome c oxidase subunit 3	P00414	COX3_HUMAN	MT-CO3
M4	5β-Hydroxyresibufogenin	0.6182	DB01998	Alpha-1-antitrypsin	P01009	A1AT_HUMAN	SERPINA1
M4	5β-Hydroxyresibufogenin	0.6667	DB02854	Ig gamma-2 chain C region	P01859	IGHG2_HUMAN	IGHG2
M4	5β-Hydroxyresibufogenin	0.6531	DB08510	Ig gamma-2 chain C region	P01859	IGHG2_HUMAN	IGHG2
M4	5β-Hydroxyresibufogenin	0.6038	DB08547	Ig gamma-2 chain C region	P01859	IGHG2_HUMAN	IGHG2
M4	5β-Hydroxyresibufogenin	0.6032	DB00497	Alpha-1-acid glycoprotein 1	P02763	A1AG1_HUMAN	ORM1
M4	5β-Hydroxyresibufogenin	0.6957	DB06871	Estrogen receptor	P03372	ESR1_HUMAN	ESR1
M4	5β-Hydroxyresibufogenin	0.68	DB07087	Estrogen receptor	P03372	ESR1_HUMAN	ESR1
M4	5β-Hydroxyresibufogenin	0.6792	DB01108	Estrogen receptor	P03372	ESR1_HUMAN	ESR1
M4	5β-Hydroxyresibufogenin	0.6739	DB00783	Estrogen receptor	P03372	ESR1_HUMAN	ESR1
M4	5β-Hydroxyresibufogenin	0.6667	DB04573	Estrogen receptor	P03372	ESR1_HUMAN	ESR1
M4	5β-Hydroxyresibufogenin	0.6596	DB00977	Estrogen receptor	P03372	ESR1_HUMAN	ESR1
M4	5β-Hydroxyresibufogenin	0.6531	DB07678	Estrogen receptor	P03372	ESR1_HUMAN	ESR1
M4	5β-Hydroxyresibufogenin	0.6346	DB07707	Estrogen receptor	P03372	ESR1_HUMAN	ESR1
M4	5β-Hydroxyresibufogenin	0.6327	DB01357	Estrogen receptor	P03372	ESR1_HUMAN	ESR1
M4	5β-Hydroxyresibufogenin	0.6304	DB00655	Estrogen receptor	P03372	ESR1_HUMAN	ESR1
M4	5β-Hydroxyresibufogenin	0.625	DB04575	Estrogen receptor	P03372	ESR1_HUMAN	ESR1
M4	5β-Hydroxyresibufogenin	0.6364	DB00641	3-hydroxy-3-methylglutaryl-coenzyme A reductase	P04035	HMDH_HUMAN	HMGCR
M4	5β-Hydroxyresibufogenin	0.6111	DB00175	3-hydroxy-3-methylglutaryl-coenzyme A reductase	P04035	HMDH_HUMAN	HMGCR
M4	5β-Hydroxyresibufogenin	0.6111	DB00227	3-hydroxy-3-methylglutaryl-coenzyme A reductase	P04035	HMDH_HUMAN	HMGCR
M4	5β-Hydroxyresibufogenin	0.6111	DB06693	3-hydroxy-3-methylglutaryl-coenzyme A reductase	P04035	HMDH_HUMAN	HMGCR
M4	5β-Hydroxyresibufogenin	0.7234	DB02659	Phospholipase A2	P04054	PA21B_HUMAN	PLA2G1B
M4	5β-Hydroxyresibufogenin	0.6364	DB00741	Annexin A1	P04083	ANXA1_HUMAN	ANXA1
M4	5β-Hydroxyresibufogenin	0.6379	DB01410	Glucocorticoid receptor	P04150	GCR_HUMAN	NR3C1
M4	5β-Hydroxyresibufogenin	0.6379	DB01260	Glucocorticoid receptor	P04150	GCR_HUMAN	NR3C1
M4	5β-Hydroxyresibufogenin	0.6379	DB01222	Glucocorticoid receptor	P04150	GCR_HUMAN	NR3C1
M4	5β-Hydroxyresibufogenin	0.6364	DB00860	Glucocorticoid receptor	P04150	GCR_HUMAN	NR3C1
M4	5β-Hydroxyresibufogenin	0.6364	DB00741	Glucocorticoid receptor	P04150	GCR_HUMAN	NR3C1
M4	5β-Hydroxyresibufogenin	0.6364	DB00635	Glucocorticoid receptor	P04150	GCR_HUMAN	NR3C1
M4	5β-Hydroxyresibufogenin	0.625	DB00959	Glucocorticoid receptor	P04150	GCR_HUMAN	NR3C1
M4	5β-Hydroxyresibufogenin	0.6071	DB01380	Glucocorticoid receptor	P04150	GCR_HUMAN	NR3C1
M4	5β-Hydroxyresibufogenin	0.6333	DB03010	Tubulin beta-4A chain	P04350	TBB4A_HUMAN	TUBB4A
M4	5β-Hydroxyresibufogenin	0.6735	DB02342	Cytochrome P450 1A1	P04798	CP1A1_HUMAN	CYP1A1
M4	5β-Hydroxyresibufogenin	0.7455	DB00390	Sodium/potassium-transporting ATPase subunit alpha-1	P05023	AT1A1_HUMAN	ATP1A1
M4	5β-Hydroxyresibufogenin	0.7273	DB00511	Sodium/potassium-transporting ATPase subunit alpha-1	P05023	AT1A1_HUMAN	ATP1A1
M4	5β-Hydroxyresibufogenin	0.7273	DB01396	Sodium/potassium-transporting ATPase subunit alpha-1	P05023	AT1A1_HUMAN	ATP1A1
M4	5β-Hydroxyresibufogenin	0.7193	DB01092	Sodium/potassium-transporting ATPase subunit alpha-1	P05023	AT1A1_HUMAN	ATP1A1
M4	5β-Hydroxyresibufogenin	0.7069	DB01078	Sodium/potassium-transporting ATPase subunit alpha-1	P05023	AT1A1_HUMAN	ATP1A1
M4	5β-Hydroxyresibufogenin	0.6364	DB00641	Integrin beta-2	P05107	ITB2_HUMAN	ITGB2
M4	5β-Hydroxyresibufogenin	0.6327	DB00163	Protein kinase C beta type	P05771	KPCB_HUMAN	PRKCB
M4	5β-Hydroxyresibufogenin	0.6122	DB02998	Progesterone receptor	P06401	PRGR_HUMAN	PGR
M4	5β-Hydroxyresibufogenin	0.6333	DB03010	Tubulin beta chain	P07437	TBB5_HUMAN	TUBB
M4	5β-Hydroxyresibufogenin	0.62	DB07908	Profilin-1	P07737	PROF1_HUMAN	PFN1
M4	5β-Hydroxyresibufogenin	0.6	DB00700	Mineralocorticoid receptor	P08235	MCR_HUMAN	NR3C2
M4	5β-Hydroxyresibufogenin	0.7234	DB02659	Cytochrome c oxidase subunit 6C	P09669	COX6C_HUMAN	COX6C
M4	5β-Hydroxyresibufogenin	0.6327	DB00163	Arachidonate 5-lipoxygenase	P09917	LOX5_HUMAN	ALOX5
M4	5β-Hydroxyresibufogenin	0.7234	DB02659	Cytochrome c oxidase subunit 8A, mitochondrial	P10176	COX8A_HUMAN	COX8A
M4	5β-Hydroxyresibufogenin	0.7292	DB00621	Androgen receptor	P10275	ANDR_HUMAN	AR
M4	5β-Hydroxyresibufogenin	0.6667	DB02901	Androgen receptor	P10275	ANDR_HUMAN	AR
M4	5β-Hydroxyresibufogenin	0.6522	DB01481	Androgen receptor	P10275	ANDR_HUMAN	AR
M4	5β-Hydroxyresibufogenin	0.6522	DB00858	Androgen receptor	P10275	ANDR_HUMAN	AR
M4	5β-Hydroxyresibufogenin	0.6122	DB00624	Androgen receptor	P10275	ANDR_HUMAN	AR
M4	5β-Hydroxyresibufogenin	0.6122	DB02998	Androgen receptor	P10275	ANDR_HUMAN	AR
M4	5β-Hydroxyresibufogenin	0.6122	DB01541	Androgen receptor	P10275	ANDR_HUMAN	AR
M4	5β-Hydroxyresibufogenin	0.6	DB06710	Androgen receptor	P10275	ANDR_HUMAN	AR
M4	5β-Hydroxyresibufogenin	0.6	DB01564	Androgen receptor	P10275	ANDR_HUMAN	AR
M4	5β-Hydroxyresibufogenin	0.7234	DB02659	Cytochrome c oxidase subunit 5B, mitochondrial	P10606	COX5B_HUMAN	COX5B
M4	5β-Hydroxyresibufogenin	0.6122	DB05107	Glucose-6-phosphate 1-dehydrogenase	P11413	G6PD_HUMAN	G6PD
M4	5β-Hydroxyresibufogenin	0.6939	DB02300	Vitamin D3 receptor	P11473	VDR_HUMAN	VDR
M4	5β-Hydroxyresibufogenin	0.64	DB00910	Vitamin D3 receptor	P11473	VDR_HUMAN	VDR
M4	5β-Hydroxyresibufogenin	0.6346	DB00136	Vitamin D3 receptor	P11473	VDR_HUMAN	VDR
M4	5β-Hydroxyresibufogenin	0.6182	DB03451	Vitamin D3 receptor	P11473	VDR_HUMAN	VDR
M4	5β-Hydroxyresibufogenin	0.6154	DB08742	Vitamin D3 receptor	P11473	VDR_HUMAN	VDR
M4	5β-Hydroxyresibufogenin	0.6154	DB04258	Vitamin D3 receptor	P11473	VDR_HUMAN	VDR
M4	5β-Hydroxyresibufogenin	0.6038	DB04796	Vitamin D3 receptor	P11473	VDR_HUMAN	VDR
M4	5β-Hydroxyresibufogenin	0.6735	DB02342	Aromatase	P11511	CP19A_HUMAN	CYP19A1
M4	5β-Hydroxyresibufogenin	0.6316	DB01024	Inosine-5'-monophosphate dehydrogenase 2	P12268	IMDH2_HUMAN	IMPDH2
M4	5β-Hydroxyresibufogenin	0.7234	DB02659	Cytochrome c oxidase subunit 4 isoform 1, mitochondrial	P13073	COX41_HUMAN	COX4I1
M4	5β-Hydroxyresibufogenin	0.6792	DB01108	3 beta-hydroxysteroid dehydrogenase/Delta 5-->4-isomerase type 1	P14060	3BHS1_HUMAN	HSD3B1
M4	5β-Hydroxyresibufogenin	0.6667	DB02901	Estradiol 17-beta-dehydrogenase 1	P14061	DHB1_HUMAN	HSD17B1
M4	5β-Hydroxyresibufogenin	0.7234	DB02659	Cytochrome c oxidase subunit 6B1	P14854	CX6B1_HUMAN	COX6B1
M4	5β-Hydroxyresibufogenin	0.6522	DB05087	Gamma-aminobutyric acid receptor subunit alpha-1	P14867	GBRA1_HUMAN	GABRA1
M4	5β-Hydroxyresibufogenin	0.6182	DB00466	Gamma-aminobutyric acid receptor subunit alpha-1	P14867	GBRA1_HUMAN	GABRA1
M4	5β-Hydroxyresibufogenin	0.7234	DB02659	Cytochrome c oxidase subunit 7C, mitochondrial	P15954	COX7C_HUMAN	COX7C
M4	5β-Hydroxyresibufogenin	0.6296	DB07633	Histo-blood group ABO system transferase	P16442	BGAT_HUMAN	ABO
M4	5β-Hydroxyresibufogenin	0.6327	DB00163	Protein kinase C alpha type	P17252	KPCA_HUMAN	PRKCA
M4	5β-Hydroxyresibufogenin	0.6032	DB00497	Alpha-1-acid glycoprotein 2	P19652	A1AG2_HUMAN	ORM2
M4	5β-Hydroxyresibufogenin	0.614	DB00749	Retinoic acid receptor RXR-alpha	P19793	RXRA_HUMAN	RXRA
M4	5β-Hydroxyresibufogenin	0.7234	DB02659	Cytochrome c oxidase subunit 5A, mitochondrial	P20674	COX5A_HUMAN	COX5A
M4	5β-Hydroxyresibufogenin	0.6111	DB00227	Integrin alpha-L	P20701	ITAL_HUMAN	ITGAL
M4	5β-Hydroxyresibufogenin	0.6316	DB01024	Inosine-5'-monophosphate dehydrogenase 1	P20839	IMDH1_HUMAN	IMPDH1
M4	5β-Hydroxyresibufogenin	0.66	DB00486	Cannabinoid receptor 1	P21554	CNR1_HUMAN	CNR1
M4	5β-Hydroxyresibufogenin	0.6735	DB02342	Catechol O-methyltransferase	P21964	COMT_HUMAN	COMT
M4	5β-Hydroxyresibufogenin	0.7234	DB02659	Ferrochelatase, mitochondrial	P22830	HEMH_HUMAN	FECH
M4	5β-Hydroxyresibufogenin	0.7234	DB02659	Liver carboxylesterase 1	P23141	EST1_HUMAN	CES1
M4	5β-Hydroxyresibufogenin	0.66	DB08224	Liver carboxylesterase 1	P23141	EST1_HUMAN	CES1
M4	5β-Hydroxyresibufogenin	0.614	DB00749	Prostaglandin G/H synthase 1	P23219	PGH1_HUMAN	PTGS1
M4	5β-Hydroxyresibufogenin	0.6182	DB00466	Glycine receptor subunit alpha-2	P23416	GLRA2_HUMAN	GLRA2
M4	5β-Hydroxyresibufogenin	0.6327	DB00163	Diacylglycerol kinase alpha	P23743	DGKA_HUMAN	DGKA
M4	5β-Hydroxyresibufogenin	0.6182	DB00466	Gamma-aminobutyric acid receptor subunit rho-1	P24046	GBRR1_HUMAN	GABRR1
M4	5β-Hydroxyresibufogenin	0.7234	DB02659	Cytochrome c oxidase subunit 7A1, mitochondrial	P24310	CX7A1_HUMAN	COX7A1
M4	5β-Hydroxyresibufogenin	0.7234	DB02659	Cytochrome c oxidase subunit 7B, mitochondrial	P24311	COX7B_HUMAN	COX7B
M4	5β-Hydroxyresibufogenin	0.6792	DB01108	3 beta-hydroxysteroid dehydrogenase/Delta 5-->4-isomerase type 2	P26439	3BHS2_HUMAN	HSD3B2
M4	5β-Hydroxyresibufogenin	0.6393	DB00602	Gamma-aminobutyric acid receptor subunit beta-3	P28472	GBRB3_HUMAN	GABRB3
M4	5β-Hydroxyresibufogenin	0.6364	DB00635	Corticosteroid 11-beta-dehydrogenase isozyme 1	P28845	DHI1_HUMAN	HSD11B1
M4	5β-Hydroxyresibufogenin	0.6111	DB02329	Corticosteroid 11-beta-dehydrogenase isozyme 1	P28845	DHI1_HUMAN	HSD11B1
M4	5β-Hydroxyresibufogenin	0.6522	DB05087	Gamma-aminobutyric acid receptor subunit alpha-5	P31644	GBRA5_HUMAN	GABRA5
M4	5β-Hydroxyresibufogenin	0.6346	DB05314	Cytidine deaminase	P32320	CDD_HUMAN	CDA
M4	5β-Hydroxyresibufogenin	0.6522	DB05087	Gamma-aminobutyric acid receptor subunit alpha-3	P34903	GBRA3_HUMAN	GABRA3
M4	5β-Hydroxyresibufogenin	0.66	DB00486	Cannabinoid receptor 2	P34972	CNR2_HUMAN	CNR2
M4	5β-Hydroxyresibufogenin	0.614	DB00749	Prostaglandin G/H synthase 2	P35354	PGH2_HUMAN	PTGS2
M4	5β-Hydroxyresibufogenin	0.6129	DB01192	Mu-type opioid receptor	P35372	OPRM_HUMAN	OPRM1
M4	5β-Hydroxyresibufogenin	0.6032	DB00497	Mu-type opioid receptor	P35372	OPRM_HUMAN	OPRM1
M4	5β-Hydroxyresibufogenin	0.6964	DB02169	Serine/threonine-protein phosphatase PP1-gamma catalytic subunit	P36873	PP1G_HUMAN	PPP1CC
M4	5β-Hydroxyresibufogenin	0.6129	DB01192	Delta-type opioid receptor	P41143	OPRD_HUMAN	OPRD1
M4	5β-Hydroxyresibufogenin	0.6032	DB00497	Delta-type opioid receptor	P41143	OPRD_HUMAN	OPRD1
M4	5β-Hydroxyresibufogenin	0.6032	DB00497	Kappa-type opioid receptor	P41145	OPRK_HUMAN	OPRK1
M4	5β-Hydroxyresibufogenin	0.6122	DB00654	Prostaglandin F2-alpha receptor	P43088	PF2R_HUMAN	PTGFR
M4	5β-Hydroxyresibufogenin	0.64	DB01240	Prostacyclin receptor	P43119	PI2R_HUMAN	PTGIR
M4	5β-Hydroxyresibufogenin	0.6346	DB00374	Prostacyclin receptor	P43119	PI2R_HUMAN	PTGIR
M4	5β-Hydroxyresibufogenin	0.6154	DB05229	Prostacyclin receptor	P43119	PI2R_HUMAN	PTGIR
M4	5β-Hydroxyresibufogenin	0.6522	DB05087	Gamma-aminobutyric acid receptor subunit alpha-2	P47869	GBRA2_HUMAN	GABRA2
M4	5β-Hydroxyresibufogenin	0.6522	DB05087	Gamma-aminobutyric acid receptor subunit alpha-4	P48169	GBRA4_HUMAN	GABRA4
M4	5β-Hydroxyresibufogenin	0.6	DB02640	Methionine aminopeptidase 2	P50579	MAP2_HUMAN	METAP2
M4	5β-Hydroxyresibufogenin	0.6	DB04324	Methionine aminopeptidase 2	P50579	MAP2_HUMAN	METAP2
M4	5β-Hydroxyresibufogenin	0.7234	DB02659	Gastrotropin	P51161	FABP6_HUMAN	FABP6
M4	5β-Hydroxyresibufogenin	0.6667	DB01046	Chloride channel protein 2	P51788	CLCN2_HUMAN	CLCN2
M4	5β-Hydroxyresibufogenin	0.6667	DB07447	3-oxo-5-beta-steroid 4-dehydrogenase	P51857	AK1D1_HUMAN	AKR1D1
M4	5β-Hydroxyresibufogenin	0.7234	DB01586	Aldo-keto reductase family 1 member C2	P52895	AK1C2_HUMAN	AKR1C2
M4	5β-Hydroxyresibufogenin	0.6122	DB07768	Aldo-keto reductase family 1 member C2	P52895	AK1C2_HUMAN	AKR1C2
M4	5β-Hydroxyresibufogenin	0.6	DB04324	Methionine aminopeptidase 1	P53582	MAP11_HUMAN	METAP1
M4	5β-Hydroxyresibufogenin	0.623	DB01780	14-3-3 protein epsilon	P62258	1433E_HUMAN	YWHAE
M4	5β-Hydroxyresibufogenin	0.7234	DB02659	Estrogen-related receptor gamma	P62508	ERR3_HUMAN	ESRRG
M4	5β-Hydroxyresibufogenin	0.6327	DB00163	Serine/threonine-protein phosphatase 2A catalytic subunit beta isoform	P62714	PP2AB_HUMAN	PPP2CB
M4	5β-Hydroxyresibufogenin	0.6923	DB02587	Guanine nucleotide-binding protein G(s) subunit alpha isoforms short	P63092	GNAS2_HUMAN	GNAS
M4	5β-Hydroxyresibufogenin	0.6327	DB00163	Serine/threonine-protein phosphatase 2A catalytic subunit alpha isoform	P67775	PP2AA_HUMAN	PPP2CA
M4	5β-Hydroxyresibufogenin	0.6333	DB03010	Tubulin alpha-1B chain	P68363	TBA1B_HUMAN	TUBA1B
M4	5β-Hydroxyresibufogenin	0.6333	DB03010	Tubulin alpha-4A chain	P68366	TBA4A_HUMAN	TUBA4A
M4	5β-Hydroxyresibufogenin	0.6333	DB03010	Tubulin beta-4B chain	P68371	TBB4B_HUMAN	TUBB4B
M4	5β-Hydroxyresibufogenin	0.6522	DB07348	ADP-ribosylation factor 1	P84077	ARF1_HUMAN	ARF1
M4	5β-Hydroxyresibufogenin	0.7234	DB02659	Cytochrome c oxidase subunit 6A2, mitochondrial	Q02221	CX6A2_HUMAN	COX6A2
M4	5β-Hydroxyresibufogenin	0.6346	DB00374	Peroxisome proliferator-activated receptor delta	Q03181	PPARD_HUMAN	PPARD
M4	5β-Hydroxyresibufogenin	0.6122	DB07768	Aldo-keto reductase family 1 member C1	Q04828	AK1C1_HUMAN	AKR1C1
M4	5β-Hydroxyresibufogenin	0.6667	DB02854	Bile salt sulfotransferase	Q06520	ST2A1_HUMAN	SULT2A1
M4	5β-Hydroxyresibufogenin	0.6923	DB02587	Adenylate cyclase type 2	Q08462	ADCY2_HUMAN	ADCY2
M4	5β-Hydroxyresibufogenin	0.6333	DB03010	Tubulin beta-3 chain	Q13509	TBB3_HUMAN	TUBB3
M4	5β-Hydroxyresibufogenin	0.6333	DB03010	Tubulin alpha-3C/D chain	Q13748	TBA3C_HUMAN	TUBA3C
M4	5β-Hydroxyresibufogenin	0.6957	DB06871	Nuclear receptor coactivator 2	Q15596	NCOA2_HUMAN	NCOA2
M4	5β-Hydroxyresibufogenin	0.68	DB07087	Nuclear receptor coactivator 2	Q15596	NCOA2_HUMAN	NCOA2
M4	5β-Hydroxyresibufogenin	0.6531	DB07678	Nuclear receptor coactivator 2	Q15596	NCOA2_HUMAN	NCOA2
M4	5β-Hydroxyresibufogenin	0.6346	DB07707	Nuclear receptor coactivator 2	Q15596	NCOA2_HUMAN	NCOA2
M4	5β-Hydroxyresibufogenin	0.6122	DB02998	Nuclear receptor coactivator 2	Q15596	NCOA2_HUMAN	NCOA2
M4	5β-Hydroxyresibufogenin	0.68	DB08220	Nuclear receptor coactivator 1	Q15788	NCOA1_HUMAN	NCOA1
M4	5β-Hydroxyresibufogenin	0.6154	DB08742	Nuclear receptor coactivator 1	Q15788	NCOA1_HUMAN	NCOA1
M4	5β-Hydroxyresibufogenin	0.6522	DB05087	Gamma-aminobutyric acid receptor subunit alpha-6	Q16445	GBRA6_HUMAN	GABRA6
M4	5β-Hydroxyresibufogenin	0.64	DB01240	Prostacyclin synthase	Q16647	PTGIS_HUMAN	PTGIS
M4	5β-Hydroxyresibufogenin	0.6735	DB02342	Hypoxia-inducible factor 1-alpha	Q16665	HIF1A_HUMAN	HIF1A
M4	5β-Hydroxyresibufogenin	0.6735	DB02342	Cytochrome P450 1B1	Q16678	CP1B1_HUMAN	CYP1B1
M4	5β-Hydroxyresibufogenin	0.6731	DB07815	Arylacetamide deacetylase-like 2	Q6P093	ADCL2_HUMAN	AADACL2
M4	5β-Hydroxyresibufogenin	0.6346	DB07814	Arylacetamide deacetylase-like 2	Q6P093	ADCL2_HUMAN	AADACL2
M4	5β-Hydroxyresibufogenin	0.6333	DB03010	Tubulin alpha-1A chain	Q71U36	TBA1A_HUMAN	TUBA1A
M4	5β-Hydroxyresibufogenin	0.7234	DB02659	Ferrochelatase	Q7KZA3	Q7KZA3_HUMAN	DKFZp686P18130
M4	5β-Hydroxyresibufogenin	0.7234	DB07690	Elongation factor Tu GTP-binding domain-containing protein 1	Q7Z2Z2	ETUD1_HUMAN	EFTUD1
M4	5β-Hydroxyresibufogenin	0.6667	DB02854	Estradiol 17-beta-dehydrogenase 11	Q8NBQ5	DHB11_HUMAN	HSD17B11
M4	5β-Hydroxyresibufogenin	0.6792	DB01108	Estrogen receptor beta	Q92731	ESR2_HUMAN	ESR2
M4	5β-Hydroxyresibufogenin	0.6739	DB00783	Estrogen receptor beta	Q92731	ESR2_HUMAN	ESR2
M4	5β-Hydroxyresibufogenin	0.6667	DB04573	Estrogen receptor beta	Q92731	ESR2_HUMAN	ESR2
M4	5β-Hydroxyresibufogenin	0.6667	DB07702	Estrogen receptor beta	Q92731	ESR2_HUMAN	ESR2
M4	5β-Hydroxyresibufogenin	0.6667	DB03882	Estrogen receptor beta	Q92731	ESR2_HUMAN	ESR2
M4	5β-Hydroxyresibufogenin	0.6111	DB00227	Histone deacetylase 2	Q92769	HDAC2_HUMAN	HDAC2
M4	5β-Hydroxyresibufogenin	0.7234	DB06777	Bile acid receptor	Q96RI1	NR1H4_HUMAN	NR1H4
M4	5β-Hydroxyresibufogenin	0.68	DB08220	Bile acid receptor	Q96RI1	NR1H4_HUMAN	NR1H4
M4	5β-Hydroxyresibufogenin	0.6522	DB07348	Cytohesin-2	Q99418	CYH2_HUMAN	CYTH2
M4	5β-Hydroxyresibufogenin	0.6333	DB03010	Tubulin alpha-1C chain	Q9BQE3	TBA1C_HUMAN	TUBA1C
M4	5β-Hydroxyresibufogenin	0.64	DB01240	P2Y purinoceptor 12	Q9H244	P2Y12_HUMAN	P2RY12
M4	5β-Hydroxyresibufogenin	0.6346	DB00374	P2Y purinoceptor 12	Q9H244	P2Y12_HUMAN	P2RY12
M4	5β-Hydroxyresibufogenin	0.6333	DB03010	Tubulin beta-1 chain	Q9H4B7	TBB1_HUMAN	TUBB1
M4	5β-Hydroxyresibufogenin	0.6667	DB07702	Nuclear receptor coactivator 5	Q9HCD5	NCOA5_HUMAN	NCOA5
M4	5β-Hydroxyresibufogenin	0.6333	DB03010	Tubulin alpha-8 chain	Q9NY65	TBA8_HUMAN	TUBA8
M4	5β-Hydroxyresibufogenin	0.6327	DB00163	SEC14-like protein 4	Q9UDX3	S14L4_HUMAN	SEC14L4
M4	5β-Hydroxyresibufogenin	0.6327	DB00163	SEC14-like protein 3	Q9UDX4	S14L3_HUMAN	SEC14L3
P5	Marinobufagin	0.68	DB02859	Acetyl-CoA carboxylase 2	O00763	ACACB_HUMAN	ACACB
P5	Marinobufagin	0.6154	DB02205	Glyceraldehyde-3-phosphate dehydrogenase, testis-specific	O14556	G3PT_HUMAN	GAPDHS
P5	Marinobufagin	0.6393	DB00602	Glycine receptor subunit alpha-3	O75311	GLRA3_HUMAN	GLRA3
P5	Marinobufagin	0.6182	DB00466	Glycine receptor subunit alpha-3	O75311	GLRA3_HUMAN	GLRA3
P5	Marinobufagin	0.6739	DB00783	Nuclear receptor subfamily 1 group I member 2	O75469	NR1I2_HUMAN	NR1I2
P5	Marinobufagin	0.6596	DB00977	Nuclear receptor subfamily 1 group I member 2	O75469	NR1I2_HUMAN	NR1I2
P5	Marinobufagin	0.6327	DB00163	Nuclear receptor subfamily 1 group I member 2	O75469	NR1I2_HUMAN	NR1I2
P5	Marinobufagin	0.6327	DB00163	SEC14-like protein 2	O76054	S14L2_HUMAN	SEC14L2
P5	Marinobufagin	0.6923	DB02587	Adenylate cyclase type 5	O95622	ADCY5_HUMAN	ADCY5
P5	Marinobufagin	0.7234	DB02659	Alcohol dehydrogenase 1C	P00326	ADH1G_HUMAN	ADH1C
P5	Marinobufagin	0.7234	DB02659	Cytochrome c oxidase subunit 1	P00395	COX1_HUMAN	MT-CO1
P5	Marinobufagin	0.7234	DB02659	Cytochrome c oxidase subunit 2	P00403	COX2_HUMAN	MT-CO2
P5	Marinobufagin	0.7234	DB02659	Cytochrome c oxidase subunit 3	P00414	COX3_HUMAN	MT-CO3
P5	Marinobufagin	0.6182	DB01998	Alpha-1-antitrypsin	P01009	A1AT_HUMAN	SERPINA1
P5	Marinobufagin	0.6667	DB02854	Ig gamma-2 chain C region	P01859	IGHG2_HUMAN	IGHG2
P5	Marinobufagin	0.6531	DB08510	Ig gamma-2 chain C region	P01859	IGHG2_HUMAN	IGHG2
P5	Marinobufagin	0.6038	DB08547	Ig gamma-2 chain C region	P01859	IGHG2_HUMAN	IGHG2
P5	Marinobufagin	0.6032	DB00497	Alpha-1-acid glycoprotein 1	P02763	A1AG1_HUMAN	ORM1
P5	Marinobufagin	0.6957	DB06871	Estrogen receptor	P03372	ESR1_HUMAN	ESR1
P5	Marinobufagin	0.68	DB07087	Estrogen receptor	P03372	ESR1_HUMAN	ESR1
P5	Marinobufagin	0.6792	DB01108	Estrogen receptor	P03372	ESR1_HUMAN	ESR1
P5	Marinobufagin	0.6739	DB00783	Estrogen receptor	P03372	ESR1_HUMAN	ESR1
P5	Marinobufagin	0.6667	DB04573	Estrogen receptor	P03372	ESR1_HUMAN	ESR1
P5	Marinobufagin	0.6596	DB00977	Estrogen receptor	P03372	ESR1_HUMAN	ESR1
P5	Marinobufagin	0.6531	DB07678	Estrogen receptor	P03372	ESR1_HUMAN	ESR1
P5	Marinobufagin	0.6346	DB07707	Estrogen receptor	P03372	ESR1_HUMAN	ESR1
P5	Marinobufagin	0.6327	DB01357	Estrogen receptor	P03372	ESR1_HUMAN	ESR1
P5	Marinobufagin	0.6304	DB00655	Estrogen receptor	P03372	ESR1_HUMAN	ESR1
P5	Marinobufagin	0.625	DB04575	Estrogen receptor	P03372	ESR1_HUMAN	ESR1
P5	Marinobufagin	0.6364	DB00641	3-hydroxy-3-methylglutaryl-coenzyme A reductase	P04035	HMDH_HUMAN	HMGCR
P5	Marinobufagin	0.6111	DB00175	3-hydroxy-3-methylglutaryl-coenzyme A reductase	P04035	HMDH_HUMAN	HMGCR
P5	Marinobufagin	0.6111	DB00227	3-hydroxy-3-methylglutaryl-coenzyme A reductase	P04035	HMDH_HUMAN	HMGCR
P5	Marinobufagin	0.6111	DB06693	3-hydroxy-3-methylglutaryl-coenzyme A reductase	P04035	HMDH_HUMAN	HMGCR
P5	Marinobufagin	0.7234	DB02659	Phospholipase A2	P04054	PA21B_HUMAN	PLA2G1B
P5	Marinobufagin	0.6364	DB00741	Annexin A1	P04083	ANXA1_HUMAN	ANXA1
P5	Marinobufagin	0.6379	DB01410	Glucocorticoid receptor	P04150	GCR_HUMAN	NR3C1
P5	Marinobufagin	0.6379	DB01260	Glucocorticoid receptor	P04150	GCR_HUMAN	NR3C1
P5	Marinobufagin	0.6379	DB01222	Glucocorticoid receptor	P04150	GCR_HUMAN	NR3C1
P5	Marinobufagin	0.6364	DB00860	Glucocorticoid receptor	P04150	GCR_HUMAN	NR3C1
P5	Marinobufagin	0.6364	DB00741	Glucocorticoid receptor	P04150	GCR_HUMAN	NR3C1
P5	Marinobufagin	0.6364	DB00635	Glucocorticoid receptor	P04150	GCR_HUMAN	NR3C1
P5	Marinobufagin	0.625	DB00959	Glucocorticoid receptor	P04150	GCR_HUMAN	NR3C1
P5	Marinobufagin	0.6071	DB01380	Glucocorticoid receptor	P04150	GCR_HUMAN	NR3C1
P5	Marinobufagin	0.6333	DB03010	Tubulin beta-4A chain	P04350	TBB4A_HUMAN	TUBB4A
P5	Marinobufagin	0.6735	DB02342	Cytochrome P450 1A1	P04798	CP1A1_HUMAN	CYP1A1
P5	Marinobufagin	0.7455	DB00390	Sodium/potassium-transporting ATPase subunit alpha-1	P05023	AT1A1_HUMAN	ATP1A1
P5	Marinobufagin	0.7273	DB00511	Sodium/potassium-transporting ATPase subunit alpha-1	P05023	AT1A1_HUMAN	ATP1A1
P5	Marinobufagin	0.7273	DB01396	Sodium/potassium-transporting ATPase subunit alpha-1	P05023	AT1A1_HUMAN	ATP1A1
P5	Marinobufagin	0.7193	DB01092	Sodium/potassium-transporting ATPase subunit alpha-1	P05023	AT1A1_HUMAN	ATP1A1
P5	Marinobufagin	0.7069	DB01078	Sodium/potassium-transporting ATPase subunit alpha-1	P05023	AT1A1_HUMAN	ATP1A1
P5	Marinobufagin	0.6364	DB00641	Integrin beta-2	P05107	ITB2_HUMAN	ITGB2
P5	Marinobufagin	0.6327	DB00163	Protein kinase C beta type	P05771	KPCB_HUMAN	PRKCB
P5	Marinobufagin	0.6122	DB02998	Progesterone receptor	P06401	PRGR_HUMAN	PGR
P5	Marinobufagin	0.6333	DB03010	Tubulin beta chain	P07437	TBB5_HUMAN	TUBB
P5	Marinobufagin	0.62	DB07908	Profilin-1	P07737	PROF1_HUMAN	PFN1
P5	Marinobufagin	0.6	DB00700	Mineralocorticoid receptor	P08235	MCR_HUMAN	NR3C2
P5	Marinobufagin	0.7234	DB02659	Cytochrome c oxidase subunit 6C	P09669	COX6C_HUMAN	COX6C
P5	Marinobufagin	0.6327	DB00163	Arachidonate 5-lipoxygenase	P09917	LOX5_HUMAN	ALOX5
P5	Marinobufagin	0.7234	DB02659	Cytochrome c oxidase subunit 8A, mitochondrial	P10176	COX8A_HUMAN	COX8A
P5	Marinobufagin	0.7292	DB00621	Androgen receptor	P10275	ANDR_HUMAN	AR
P5	Marinobufagin	0.6667	DB02901	Androgen receptor	P10275	ANDR_HUMAN	AR
P5	Marinobufagin	0.6522	DB01481	Androgen receptor	P10275	ANDR_HUMAN	AR
P5	Marinobufagin	0.6522	DB00858	Androgen receptor	P10275	ANDR_HUMAN	AR
P5	Marinobufagin	0.6122	DB00624	Androgen receptor	P10275	ANDR_HUMAN	AR
P5	Marinobufagin	0.6122	DB02998	Androgen receptor	P10275	ANDR_HUMAN	AR
P5	Marinobufagin	0.6122	DB01541	Androgen receptor	P10275	ANDR_HUMAN	AR
P5	Marinobufagin	0.6	DB06710	Androgen receptor	P10275	ANDR_HUMAN	AR
P5	Marinobufagin	0.6	DB01564	Androgen receptor	P10275	ANDR_HUMAN	AR
P5	Marinobufagin	0.7234	DB02659	Cytochrome c oxidase subunit 5B, mitochondrial	P10606	COX5B_HUMAN	COX5B
P5	Marinobufagin	0.6122	DB05107	Glucose-6-phosphate 1-dehydrogenase	P11413	G6PD_HUMAN	G6PD
P5	Marinobufagin	0.6939	DB02300	Vitamin D3 receptor	P11473	VDR_HUMAN	VDR
P5	Marinobufagin	0.64	DB00910	Vitamin D3 receptor	P11473	VDR_HUMAN	VDR
P5	Marinobufagin	0.6346	DB00136	Vitamin D3 receptor	P11473	VDR_HUMAN	VDR
P5	Marinobufagin	0.6182	DB03451	Vitamin D3 receptor	P11473	VDR_HUMAN	VDR
P5	Marinobufagin	0.6154	DB08742	Vitamin D3 receptor	P11473	VDR_HUMAN	VDR
P5	Marinobufagin	0.6154	DB04258	Vitamin D3 receptor	P11473	VDR_HUMAN	VDR
P5	Marinobufagin	0.6038	DB04796	Vitamin D3 receptor	P11473	VDR_HUMAN	VDR
P5	Marinobufagin	0.6735	DB02342	Aromatase	P11511	CP19A_HUMAN	CYP19A1
P5	Marinobufagin	0.6316	DB01024	Inosine-5'-monophosphate dehydrogenase 2	P12268	IMDH2_HUMAN	IMPDH2
P5	Marinobufagin	0.7234	DB02659	Cytochrome c oxidase subunit 4 isoform 1, mitochondrial	P13073	COX41_HUMAN	COX4I1
P5	Marinobufagin	0.6792	DB01108	3 beta-hydroxysteroid dehydrogenase/Delta 5-->4-isomerase type 1	P14060	3BHS1_HUMAN	HSD3B1
P5	Marinobufagin	0.6667	DB02901	Estradiol 17-beta-dehydrogenase 1	P14061	DHB1_HUMAN	HSD17B1
P5	Marinobufagin	0.7234	DB02659	Cytochrome c oxidase subunit 6B1	P14854	CX6B1_HUMAN	COX6B1
P5	Marinobufagin	0.6522	DB05087	Gamma-aminobutyric acid receptor subunit alpha-1	P14867	GBRA1_HUMAN	GABRA1
P5	Marinobufagin	0.6182	DB00466	Gamma-aminobutyric acid receptor subunit alpha-1	P14867	GBRA1_HUMAN	GABRA1
P5	Marinobufagin	0.7234	DB02659	Cytochrome c oxidase subunit 7C, mitochondrial	P15954	COX7C_HUMAN	COX7C
P5	Marinobufagin	0.6296	DB07633	Histo-blood group ABO system transferase	P16442	BGAT_HUMAN	ABO
P5	Marinobufagin	0.6327	DB00163	Protein kinase C alpha type	P17252	KPCA_HUMAN	PRKCA
P5	Marinobufagin	0.6032	DB00497	Alpha-1-acid glycoprotein 2	P19652	A1AG2_HUMAN	ORM2
P5	Marinobufagin	0.614	DB00749	Retinoic acid receptor RXR-alpha	P19793	RXRA_HUMAN	RXRA
P5	Marinobufagin	0.7234	DB02659	Cytochrome c oxidase subunit 5A, mitochondrial	P20674	COX5A_HUMAN	COX5A
P5	Marinobufagin	0.6111	DB00227	Integrin alpha-L	P20701	ITAL_HUMAN	ITGAL
P5	Marinobufagin	0.6316	DB01024	Inosine-5'-monophosphate dehydrogenase 1	P20839	IMDH1_HUMAN	IMPDH1
P5	Marinobufagin	0.66	DB00486	Cannabinoid receptor 1	P21554	CNR1_HUMAN	CNR1
P5	Marinobufagin	0.6735	DB02342	Catechol O-methyltransferase	P21964	COMT_HUMAN	COMT
P5	Marinobufagin	0.7234	DB02659	Ferrochelatase, mitochondrial	P22830	HEMH_HUMAN	FECH
P5	Marinobufagin	0.7234	DB02659	Liver carboxylesterase 1	P23141	EST1_HUMAN	CES1
P5	Marinobufagin	0.66	DB08224	Liver carboxylesterase 1	P23141	EST1_HUMAN	CES1
P5	Marinobufagin	0.614	DB00749	Prostaglandin G/H synthase 1	P23219	PGH1_HUMAN	PTGS1
P5	Marinobufagin	0.6182	DB00466	Glycine receptor subunit alpha-2	P23416	GLRA2_HUMAN	GLRA2
P5	Marinobufagin	0.6327	DB00163	Diacylglycerol kinase alpha	P23743	DGKA_HUMAN	DGKA
P5	Marinobufagin	0.6182	DB00466	Gamma-aminobutyric acid receptor subunit rho-1	P24046	GBRR1_HUMAN	GABRR1
P5	Marinobufagin	0.7234	DB02659	Cytochrome c oxidase subunit 7A1, mitochondrial	P24310	CX7A1_HUMAN	COX7A1
P5	Marinobufagin	0.7234	DB02659	Cytochrome c oxidase subunit 7B, mitochondrial	P24311	COX7B_HUMAN	COX7B
P5	Marinobufagin	0.6792	DB01108	3 beta-hydroxysteroid dehydrogenase/Delta 5-->4-isomerase type 2	P26439	3BHS2_HUMAN	HSD3B2
P5	Marinobufagin	0.6393	DB00602	Gamma-aminobutyric acid receptor subunit beta-3	P28472	GBRB3_HUMAN	GABRB3
P5	Marinobufagin	0.6364	DB00635	Corticosteroid 11-beta-dehydrogenase isozyme 1	P28845	DHI1_HUMAN	HSD11B1
P5	Marinobufagin	0.6111	DB02329	Corticosteroid 11-beta-dehydrogenase isozyme 1	P28845	DHI1_HUMAN	HSD11B1
P5	Marinobufagin	0.6522	DB05087	Gamma-aminobutyric acid receptor subunit alpha-5	P31644	GBRA5_HUMAN	GABRA5
P5	Marinobufagin	0.6346	DB05314	Cytidine deaminase	P32320	CDD_HUMAN	CDA
P5	Marinobufagin	0.6522	DB05087	Gamma-aminobutyric acid receptor subunit alpha-3	P34903	GBRA3_HUMAN	GABRA3
P5	Marinobufagin	0.66	DB00486	Cannabinoid receptor 2	P34972	CNR2_HUMAN	CNR2
P5	Marinobufagin	0.614	DB00749	Prostaglandin G/H synthase 2	P35354	PGH2_HUMAN	PTGS2
P5	Marinobufagin	0.6129	DB01192	Mu-type opioid receptor	P35372	OPRM_HUMAN	OPRM1
P5	Marinobufagin	0.6032	DB00497	Mu-type opioid receptor	P35372	OPRM_HUMAN	OPRM1
P5	Marinobufagin	0.6964	DB02169	Serine/threonine-protein phosphatase PP1-gamma catalytic subunit	P36873	PP1G_HUMAN	PPP1CC
P5	Marinobufagin	0.6129	DB01192	Delta-type opioid receptor	P41143	OPRD_HUMAN	OPRD1
P5	Marinobufagin	0.6032	DB00497	Delta-type opioid receptor	P41143	OPRD_HUMAN	OPRD1
P5	Marinobufagin	0.6032	DB00497	Kappa-type opioid receptor	P41145	OPRK_HUMAN	OPRK1
P5	Marinobufagin	0.6122	DB00654	Prostaglandin F2-alpha receptor	P43088	PF2R_HUMAN	PTGFR
P5	Marinobufagin	0.64	DB01240	Prostacyclin receptor	P43119	PI2R_HUMAN	PTGIR
P5	Marinobufagin	0.6346	DB00374	Prostacyclin receptor	P43119	PI2R_HUMAN	PTGIR
P5	Marinobufagin	0.6154	DB05229	Prostacyclin receptor	P43119	PI2R_HUMAN	PTGIR
P5	Marinobufagin	0.6522	DB05087	Gamma-aminobutyric acid receptor subunit alpha-2	P47869	GBRA2_HUMAN	GABRA2
P5	Marinobufagin	0.6522	DB05087	Gamma-aminobutyric acid receptor subunit alpha-4	P48169	GBRA4_HUMAN	GABRA4
P5	Marinobufagin	0.6	DB02640	Methionine aminopeptidase 2	P50579	MAP2_HUMAN	METAP2
P5	Marinobufagin	0.6	DB04324	Methionine aminopeptidase 2	P50579	MAP2_HUMAN	METAP2
P5	Marinobufagin	0.7234	DB02659	Gastrotropin	P51161	FABP6_HUMAN	FABP6
P5	Marinobufagin	0.6667	DB01046	Chloride channel protein 2	P51788	CLCN2_HUMAN	CLCN2
P5	Marinobufagin	0.6667	DB07447	3-oxo-5-beta-steroid 4-dehydrogenase	P51857	AK1D1_HUMAN	AKR1D1
P5	Marinobufagin	0.7234	DB01586	Aldo-keto reductase family 1 member C2	P52895	AK1C2_HUMAN	AKR1C2
P5	Marinobufagin	0.6122	DB07768	Aldo-keto reductase family 1 member C2	P52895	AK1C2_HUMAN	AKR1C2
P5	Marinobufagin	0.6	DB04324	Methionine aminopeptidase 1	P53582	MAP11_HUMAN	METAP1
P5	Marinobufagin	0.623	DB01780	14-3-3 protein epsilon	P62258	1433E_HUMAN	YWHAE
P5	Marinobufagin	0.7234	DB02659	Estrogen-related receptor gamma	P62508	ERR3_HUMAN	ESRRG
P5	Marinobufagin	0.6327	DB00163	Serine/threonine-protein phosphatase 2A catalytic subunit beta isoform	P62714	PP2AB_HUMAN	PPP2CB
P5	Marinobufagin	0.6923	DB02587	Guanine nucleotide-binding protein G(s) subunit alpha isoforms short	P63092	GNAS2_HUMAN	GNAS
P5	Marinobufagin	0.6327	DB00163	Serine/threonine-protein phosphatase 2A catalytic subunit alpha isoform	P67775	PP2AA_HUMAN	PPP2CA
P5	Marinobufagin	0.6333	DB03010	Tubulin alpha-1B chain	P68363	TBA1B_HUMAN	TUBA1B
P5	Marinobufagin	0.6333	DB03010	Tubulin alpha-4A chain	P68366	TBA4A_HUMAN	TUBA4A
P5	Marinobufagin	0.6333	DB03010	Tubulin beta-4B chain	P68371	TBB4B_HUMAN	TUBB4B
P5	Marinobufagin	0.6522	DB07348	ADP-ribosylation factor 1	P84077	ARF1_HUMAN	ARF1
P5	Marinobufagin	0.7234	DB02659	Cytochrome c oxidase subunit 6A2, mitochondrial	Q02221	CX6A2_HUMAN	COX6A2
P5	Marinobufagin	0.6346	DB00374	Peroxisome proliferator-activated receptor delta	Q03181	PPARD_HUMAN	PPARD
P5	Marinobufagin	0.6122	DB07768	Aldo-keto reductase family 1 member C1	Q04828	AK1C1_HUMAN	AKR1C1
P5	Marinobufagin	0.6667	DB02854	Bile salt sulfotransferase	Q06520	ST2A1_HUMAN	SULT2A1
P5	Marinobufagin	0.6923	DB02587	Adenylate cyclase type 2	Q08462	ADCY2_HUMAN	ADCY2
P5	Marinobufagin	0.6333	DB03010	Tubulin beta-3 chain	Q13509	TBB3_HUMAN	TUBB3
P5	Marinobufagin	0.6333	DB03010	Tubulin alpha-3C/D chain	Q13748	TBA3C_HUMAN	TUBA3C
P5	Marinobufagin	0.6957	DB06871	Nuclear receptor coactivator 2	Q15596	NCOA2_HUMAN	NCOA2
P5	Marinobufagin	0.68	DB07087	Nuclear receptor coactivator 2	Q15596	NCOA2_HUMAN	NCOA2
P5	Marinobufagin	0.6531	DB07678	Nuclear receptor coactivator 2	Q15596	NCOA2_HUMAN	NCOA2
P5	Marinobufagin	0.6346	DB07707	Nuclear receptor coactivator 2	Q15596	NCOA2_HUMAN	NCOA2
P5	Marinobufagin	0.6122	DB02998	Nuclear receptor coactivator 2	Q15596	NCOA2_HUMAN	NCOA2
P5	Marinobufagin	0.68	DB08220	Nuclear receptor coactivator 1	Q15788	NCOA1_HUMAN	NCOA1
P5	Marinobufagin	0.6154	DB08742	Nuclear receptor coactivator 1	Q15788	NCOA1_HUMAN	NCOA1
P5	Marinobufagin	0.6522	DB05087	Gamma-aminobutyric acid receptor subunit alpha-6	Q16445	GBRA6_HUMAN	GABRA6
P5	Marinobufagin	0.64	DB01240	Prostacyclin synthase	Q16647	PTGIS_HUMAN	PTGIS
P5	Marinobufagin	0.6735	DB02342	Hypoxia-inducible factor 1-alpha	Q16665	HIF1A_HUMAN	HIF1A
P5	Marinobufagin	0.6735	DB02342	Cytochrome P450 1B1	Q16678	CP1B1_HUMAN	CYP1B1
P5	Marinobufagin	0.6731	DB07815	Arylacetamide deacetylase-like 2	Q6P093	ADCL2_HUMAN	AADACL2
P5	Marinobufagin	0.6346	DB07814	Arylacetamide deacetylase-like 2	Q6P093	ADCL2_HUMAN	AADACL2
P5	Marinobufagin	0.6333	DB03010	Tubulin alpha-1A chain	Q71U36	TBA1A_HUMAN	TUBA1A
P5	Marinobufagin	0.7234	DB02659	Ferrochelatase	Q7KZA3	Q7KZA3_HUMAN	DKFZp686P18130
P5	Marinobufagin	0.7234	DB07690	Elongation factor Tu GTP-binding domain-containing protein 1	Q7Z2Z2	ETUD1_HUMAN	EFTUD1
P5	Marinobufagin	0.6667	DB02854	Estradiol 17-beta-dehydrogenase 11	Q8NBQ5	DHB11_HUMAN	HSD17B11
P5	Marinobufagin	0.6792	DB01108	Estrogen receptor beta	Q92731	ESR2_HUMAN	ESR2
P5	Marinobufagin	0.6739	DB00783	Estrogen receptor beta	Q92731	ESR2_HUMAN	ESR2
P5	Marinobufagin	0.6667	DB04573	Estrogen receptor beta	Q92731	ESR2_HUMAN	ESR2
P5	Marinobufagin	0.6667	DB07702	Estrogen receptor beta	Q92731	ESR2_HUMAN	ESR2
P5	Marinobufagin	0.6667	DB03882	Estrogen receptor beta	Q92731	ESR2_HUMAN	ESR2
P5	Marinobufagin	0.6111	DB00227	Histone deacetylase 2	Q92769	HDAC2_HUMAN	HDAC2
P5	Marinobufagin	0.7234	DB06777	Bile acid receptor	Q96RI1	NR1H4_HUMAN	NR1H4
P5	Marinobufagin	0.68	DB08220	Bile acid receptor	Q96RI1	NR1H4_HUMAN	NR1H4
P5	Marinobufagin	0.6522	DB07348	Cytohesin-2	Q99418	CYH2_HUMAN	CYTH2
P5	Marinobufagin	0.6333	DB03010	Tubulin alpha-1C chain	Q9BQE3	TBA1C_HUMAN	TUBA1C
P5	Marinobufagin	0.64	DB01240	P2Y purinoceptor 12	Q9H244	P2Y12_HUMAN	P2RY12
P5	Marinobufagin	0.6346	DB00374	P2Y purinoceptor 12	Q9H244	P2Y12_HUMAN	P2RY12
P5	Marinobufagin	0.6333	DB03010	Tubulin beta-1 chain	Q9H4B7	TBB1_HUMAN	TUBB1
P5	Marinobufagin	0.6667	DB07702	Nuclear receptor coactivator 5	Q9HCD5	NCOA5_HUMAN	NCOA5
P5	Marinobufagin	0.6333	DB03010	Tubulin alpha-8 chain	Q9NY65	TBA8_HUMAN	TUBA8
P5	Marinobufagin	0.6327	DB00163	SEC14-like protein 4	Q9UDX3	S14L4_HUMAN	SEC14L4
P5	Marinobufagin	0.6327	DB00163	SEC14-like protein 3	Q9UDX4	S14L3_HUMAN	SEC14L3
P5	Marinobufagin	0.6038	DB04141	Succinate dehydrogenase [ubiquinone] cytochrome b small subunit, mitochondrial	O14521	DHSD_HUMAN	SDHD
P5	Marinobufagin	0.6038	DB04141	Cytochrome b-c1 complex subunit 8	O14949	QCR8_HUMAN	UQCRQ
P5	Marinobufagin	0.629	DB00602	Glycine receptor subunit alpha-3	O75311	GLRA3_HUMAN	GLRA3
P5	Marinobufagin	0.6596	DB00783	Nuclear receptor subfamily 1 group I member 2	O75469	NR1I2_HUMAN	NR1I2
P5	Marinobufagin	0.6458	DB00977	Nuclear receptor subfamily 1 group I member 2	O75469	NR1I2_HUMAN	NR1I2
P5	Marinobufagin	0.62	DB00163	Nuclear receptor subfamily 1 group I member 2	O75469	NR1I2_HUMAN	NR1I2
P5	Marinobufagin	0.62	DB00163	SEC14-like protein 2	O76054	S14L2_HUMAN	SEC14L2
P5	Marinobufagin	0.6038	DB04141	Cytochrome b	P00156	CYB_HUMAN	MT-CYB
P5	Marinobufagin	0.7083	DB02659	Alcohol dehydrogenase 1C	P00326	ADH1G_HUMAN	ADH1C
P5	Marinobufagin	0.7083	DB02659	Cytochrome c oxidase subunit 1	P00395	COX1_HUMAN	MT-CO1
P5	Marinobufagin	0.7083	DB02659	Cytochrome c oxidase subunit 2	P00403	COX2_HUMAN	MT-CO2
P5	Marinobufagin	0.7083	DB02659	Cytochrome c oxidase subunit 3	P00414	COX3_HUMAN	MT-CO3
P5	Marinobufagin	0.6111	DB01088	Tissue-type plasminogen activator	P00750	TPA_HUMAN	PLAT
P5	Marinobufagin	0.6667	DB01998	Alpha-1-antitrypsin	P01009	A1AT_HUMAN	SERPINA1
P5	Marinobufagin	0.64	DB08510	Ig gamma-2 chain C region	P01859	IGHG2_HUMAN	IGHG2
P5	Marinobufagin	0.617	DB02854	Ig gamma-2 chain C region	P01859	IGHG2_HUMAN	IGHG2
P5	Marinobufagin	0.7347	DB07087	Estrogen receptor	P03372	ESR1_HUMAN	ESR1
P5	Marinobufagin	0.6863	DB07707	Estrogen receptor	P03372	ESR1_HUMAN	ESR1
P5	Marinobufagin	0.6596	DB00783	Estrogen receptor	P03372	ESR1_HUMAN	ESR1
P5	Marinobufagin	0.6531	DB04573	Estrogen receptor	P03372	ESR1_HUMAN	ESR1
P5	Marinobufagin	0.6458	DB06871	Estrogen receptor	P03372	ESR1_HUMAN	ESR1
P5	Marinobufagin	0.6458	DB00977	Estrogen receptor	P03372	ESR1_HUMAN	ESR1
P5	Marinobufagin	0.64	DB07678	Estrogen receptor	P03372	ESR1_HUMAN	ESR1
P5	Marinobufagin	0.617	DB00655	Estrogen receptor	P03372	ESR1_HUMAN	ESR1
P5	Marinobufagin	0.6122	DB04575	Estrogen receptor	P03372	ESR1_HUMAN	ESR1
P5	Marinobufagin	0.6078	DB08020	Estrogen receptor	P03372	ESR1_HUMAN	ESR1
P5	Marinobufagin	0.6071	DB01108	Estrogen receptor	P03372	ESR1_HUMAN	ESR1
P5	Marinobufagin	0.7083	DB02659	Phospholipase A2	P04054	PA21B_HUMAN	PLA2G1B
P5	Marinobufagin	0.6545	DB00741	Annexin A1	P04083	ANXA1_HUMAN	ANXA1
P5	Marinobufagin	0.6066	DB00288	Annexin A1	P04083	ANXA1_HUMAN	ANXA1
P5	Marinobufagin	0.6	DB01234	Annexin A1	P04083	ANXA1_HUMAN	ANXA1
P5	Marinobufagin	0.6842	DB01260	Glucocorticoid receptor	P04150	GCR_HUMAN	NR3C1
P5	Marinobufagin	0.6842	DB01222	Glucocorticoid receptor	P04150	GCR_HUMAN	NR3C1
P5	Marinobufagin	0.6552	DB01410	Glucocorticoid receptor	P04150	GCR_HUMAN	NR3C1
P5	Marinobufagin	0.6545	DB00860	Glucocorticoid receptor	P04150	GCR_HUMAN	NR3C1
P5	Marinobufagin	0.6545	DB00741	Glucocorticoid receptor	P04150	GCR_HUMAN	NR3C1
P5	Marinobufagin	0.6545	DB00635	Glucocorticoid receptor	P04150	GCR_HUMAN	NR3C1
P5	Marinobufagin	0.6429	DB00959	Glucocorticoid receptor	P04150	GCR_HUMAN	NR3C1
P5	Marinobufagin	0.6393	DB00846	Glucocorticoid receptor	P04150	GCR_HUMAN	NR3C1
P5	Marinobufagin	0.6316	DB00873	Glucocorticoid receptor	P04150	GCR_HUMAN	NR3C1
P5	Marinobufagin	0.625	DB01380	Glucocorticoid receptor	P04150	GCR_HUMAN	NR3C1
P5	Marinobufagin	0.6102	DB00687	Glucocorticoid receptor	P04150	GCR_HUMAN	NR3C1
P5	Marinobufagin	0.6066	DB00591	Glucocorticoid receptor	P04150	GCR_HUMAN	NR3C1
P5	Marinobufagin	0.6066	DB00288	Glucocorticoid receptor	P04150	GCR_HUMAN	NR3C1
P5	Marinobufagin	0.6066	DB00180	Glucocorticoid receptor	P04150	GCR_HUMAN	NR3C1
P5	Marinobufagin	0.6034	DB00547	Glucocorticoid receptor	P04150	GCR_HUMAN	NR3C1
P5	Marinobufagin	0.6	DB00443	Glucocorticoid receptor	P04150	GCR_HUMAN	NR3C1
P5	Marinobufagin	0.6	DB00620	Glucocorticoid receptor	P04150	GCR_HUMAN	NR3C1
P5	Marinobufagin	0.6	DB01234	Glucocorticoid receptor	P04150	GCR_HUMAN	NR3C1
P5	Marinobufagin	0.6275	DB02342	Cytochrome P450 1A1	P04798	CP1A1_HUMAN	CYP1A1
P5	Marinobufagin	0.7368	DB01092	Sodium/potassium-transporting ATPase subunit alpha-1	P05023	AT1A1_HUMAN	ATP1A1
P5	Marinobufagin	0.7241	DB01078	Sodium/potassium-transporting ATPase subunit alpha-1	P05023	AT1A1_HUMAN	ATP1A1
P5	Marinobufagin	0.7143	DB00511	Sodium/potassium-transporting ATPase subunit alpha-1	P05023	AT1A1_HUMAN	ATP1A1
P5	Marinobufagin	0.7143	DB01396	Sodium/potassium-transporting ATPase subunit alpha-1	P05023	AT1A1_HUMAN	ATP1A1
P5	Marinobufagin	0.7018	DB00390	Sodium/potassium-transporting ATPase subunit alpha-1	P05023	AT1A1_HUMAN	ATP1A1
P5	Marinobufagin	0.6154	DB02115	Aldehyde dehydrogenase, mitochondrial	P05091	ALDH2_HUMAN	ALDH2
P5	Marinobufagin	0.62	DB00163	Protein kinase C beta type	P05771	KPCB_HUMAN	PRKCB
P5	Marinobufagin	0.7083	DB07908	Profilin-1	P07737	PROF1_HUMAN	PFN1
P5	Marinobufagin	0.6038	DB04141	Cytochrome b-c1 complex subunit 6, mitochondrial	P07919	QCR6_HUMAN	UQCRH
P5	Marinobufagin	0.6038	DB03152	Rhodopsin	P08100	OPSD_HUMAN	RHO
P5	Marinobufagin	0.6731	DB04630	Mineralocorticoid receptor	P08235	MCR_HUMAN	NR3C2
P5	Marinobufagin	0.6604	DB04652	Mineralocorticoid receptor	P08235	MCR_HUMAN	NR3C2
P5	Marinobufagin	0.6102	DB00687	Mineralocorticoid receptor	P08235	MCR_HUMAN	NR3C2
P5	Marinobufagin	0.6038	DB04141	Cytochrome c1, heme protein, mitochondrial	P08574	CY1_HUMAN	CYC1
P5	Marinobufagin	0.7083	DB02659	Cytochrome c oxidase subunit 6C	P09669	COX6C_HUMAN	COX6C
P5	Marinobufagin	0.62	DB00163	Arachidonate 5-lipoxygenase	P09917	LOX5_HUMAN	ALOX5
P5	Marinobufagin	0.7083	DB02659	Cytochrome c oxidase subunit 8A, mitochondrial	P10176	COX8A_HUMAN	COX8A
P5	Marinobufagin	0.75	DB00621	Androgen receptor	P10275	ANDR_HUMAN	AR
P5	Marinobufagin	0.6415	DB07717	Androgen receptor	P10275	ANDR_HUMAN	AR
P5	Marinobufagin	0.617	DB02901	Androgen receptor	P10275	ANDR_HUMAN	AR
P5	Marinobufagin	0.6102	DB00687	Androgen receptor	P10275	ANDR_HUMAN	AR
P5	Marinobufagin	0.6042	DB01481	Androgen receptor	P10275	ANDR_HUMAN	AR
P5	Marinobufagin	0.6042	DB00858	Androgen receptor	P10275	ANDR_HUMAN	AR
P5	Marinobufagin	0.7083	DB02659	Cytochrome c oxidase subunit 5B, mitochondrial	P10606	COX5B_HUMAN	COX5B
P5	Marinobufagin	0.6071	DB03451	Vitamin D3 receptor	P11473	VDR_HUMAN	VDR
P5	Marinobufagin	0.6034	DB05295	Vitamin D3 receptor	P11473	VDR_HUMAN	VDR
P5	Marinobufagin	0.6275	DB02342	Aromatase	P11511	CP19A_HUMAN	CYP19A1
P5	Marinobufagin	0.6491	DB01024	Inosine-5'-monophosphate dehydrogenase 2	P12268	IMDH2_HUMAN	IMPDH2
P5	Marinobufagin	0.7083	DB02659	Cytochrome c oxidase subunit 4 isoform 1, mitochondrial	P13073	COX41_HUMAN	COX4I1
P5	Marinobufagin	0.6415	DB03279	Retinoic acid receptor gamma	P13631	RARG_HUMAN	RARG
P5	Marinobufagin	0.6071	DB01108	3 beta-hydroxysteroid dehydrogenase/Delta 5-->4-isomerase type 1	P14060	3BHS1_HUMAN	HSD3B1
P5	Marinobufagin	0.617	DB02901	Estradiol 17-beta-dehydrogenase 1	P14061	DHB1_HUMAN	HSD17B1
P5	Marinobufagin	0.7083	DB02659	Cytochrome c oxidase subunit 6B1	P14854	CX6B1_HUMAN	COX6B1
P5	Marinobufagin	0.6042	DB05087	Gamma-aminobutyric acid receptor subunit alpha-1	P14867	GBRA1_HUMAN	GABRA1
P5	Marinobufagin	0.6038	DB04141	Cytochrome b-c1 complex subunit 7	P14927	QCR7_HUMAN	UQCRB
P5	Marinobufagin	0.7083	DB02659	Cytochrome c oxidase subunit 7C, mitochondrial	P15954	COX7C_HUMAN	COX7C
P5	Marinobufagin	0.6481	DB07633	Histo-blood group ABO system transferase	P16442	BGAT_HUMAN	ABO
P5	Marinobufagin	0.6346	DB03772	Histo-blood group ABO system transferase	P16442	BGAT_HUMAN	ABO
P5	Marinobufagin	0.6038	DB04680	Histo-blood group ABO system transferase	P16442	BGAT_HUMAN	ABO
P5	Marinobufagin	0.6038	DB04141	Histo-blood group ABO system transferase	P16442	BGAT_HUMAN	ABO
P5	Marinobufagin	0.62	DB00163	Protein kinase C alpha type	P17252	KPCA_HUMAN	PRKCA
P5	Marinobufagin	0.6316	DB00749	Retinoic acid receptor RXR-alpha	P19793	RXRA_HUMAN	RXRA
P5	Marinobufagin	0.7083	DB02659	Cytochrome c oxidase subunit 5A, mitochondrial	P20674	COX5A_HUMAN	COX5A
P5	Marinobufagin	0.6491	DB01024	Inosine-5'-monophosphate dehydrogenase 1	P20839	IMDH1_HUMAN	IMPDH1
P5	Marinobufagin	0.6154	DB00486	Cannabinoid receptor 1	P21554	CNR1_HUMAN	CNR1
P5	Marinobufagin	0.6038	DB04141	Succinate dehydrogenase [ubiquinone] iron-sulfur subunit, mitochondrial	P21912	SDHB_HUMAN	SDHB
P5	Marinobufagin	0.6275	DB02342	Catechol O-methyltransferase	P21964	COMT_HUMAN	COMT
P5	Marinobufagin	0.6038	DB04141	Cytochrome b-c1 complex subunit 2, mitochondrial	P22695	QCR2_HUMAN	UQCRC2
P5	Marinobufagin	0.7083	DB02659	Ferrochelatase, mitochondrial	P22830	HEMH_HUMAN	FECH
P5	Marinobufagin	0.7083	DB02659	Liver carboxylesterase 1	P23141	EST1_HUMAN	CES1
P5	Marinobufagin	0.6471	DB08224	Liver carboxylesterase 1	P23141	EST1_HUMAN	CES1
P5	Marinobufagin	0.6316	DB00749	Prostaglandin G/H synthase 1	P23219	PGH1_HUMAN	PTGS1
P5	Marinobufagin	0.62	DB00163	Diacylglycerol kinase alpha	P23743	DGKA_HUMAN	DGKA
P5	Marinobufagin	0.7083	DB02659	Cytochrome c oxidase subunit 7A1, mitochondrial	P24310	CX7A1_HUMAN	COX7A1
P5	Marinobufagin	0.7083	DB02659	Cytochrome c oxidase subunit 7B, mitochondrial	P24311	COX7B_HUMAN	COX7B
P5	Marinobufagin	0.6071	DB01108	3 beta-hydroxysteroid dehydrogenase/Delta 5-->4-isomerase type 2	P26439	3BHS2_HUMAN	HSD3B2
P5	Marinobufagin	0.6111	DB01088	cAMP-specific 3',5'-cyclic phosphodiesterase 4A	P27815	PDE4A_HUMAN	PDE4A
P5	Marinobufagin	0.6	DB08059	Phosphatidylinositol 3-kinase regulatory subunit alpha	P27986	P85A_HUMAN	PIK3R1
P5	Marinobufagin	0.629	DB00602	Gamma-aminobutyric acid receptor subunit beta-3	P28472	GBRB3_HUMAN	GABRB3
P5	Marinobufagin	0.6604	DB04652	Corticosteroid 11-beta-dehydrogenase isozyme 1	P28845	DHI1_HUMAN	HSD11B1
P5	Marinobufagin	0.6545	DB00635	Corticosteroid 11-beta-dehydrogenase isozyme 1	P28845	DHI1_HUMAN	HSD11B1
P5	Marinobufagin	0.6	DB02329	Corticosteroid 11-beta-dehydrogenase isozyme 1	P28845	DHI1_HUMAN	HSD11B1
P5	Marinobufagin	0.6038	DB04141	Succinate dehydrogenase [ubiquinone] flavoprotein subunit, mitochondrial	P31040	SDHA_HUMAN	SDHA
P5	Marinobufagin	0.6042	DB05087	Gamma-aminobutyric acid receptor subunit alpha-5	P31644	GBRA5_HUMAN	GABRA5
P5	Marinobufagin	0.6038	DB04141	Cytochrome b-c1 complex subunit 1, mitochondrial	P31930	QCR1_HUMAN	UQCRC1
P5	Marinobufagin	0.6042	DB05087	Gamma-aminobutyric acid receptor subunit alpha-3	P34903	GBRA3_HUMAN	GABRA3
P5	Marinobufagin	0.6154	DB00486	Cannabinoid receptor 2	P34972	CNR2_HUMAN	CNR2
P5	Marinobufagin	0.6111	DB01088	Prostaglandin E2 receptor EP1 subtype	P34995	PE2R1_HUMAN	PTGER1
P5	Marinobufagin	0.6	DB01234	Nitric oxide synthase, inducible	P35228	NOS2_HUMAN	NOS2
P5	Marinobufagin	0.6316	DB00749	Prostaglandin G/H synthase 2	P35354	PGH2_HUMAN	PTGS2
P5	Marinobufagin	0.6061	DB06800	Mu-type opioid receptor	P35372	OPRM_HUMAN	OPRM1
P5	Marinobufagin	0.6032	DB01192	Mu-type opioid receptor	P35372	OPRM_HUMAN	OPRM1
P5	Marinobufagin	0.7143	DB02169	Serine/threonine-protein phosphatase PP1-gamma catalytic subunit	P36873	PP1G_HUMAN	PPP1CC
P5	Marinobufagin	0.6032	DB01192	Delta-type opioid receptor	P41143	OPRD_HUMAN	OPRD1
P5	Marinobufagin	0.6061	DB06800	Kappa-type opioid receptor	P41145	OPRK_HUMAN	OPRK1
P5	Marinobufagin	0.6154	DB01698	Aldo-keto reductase family 1 member C3	P42330	AK1C3_HUMAN	AKR1C3
P5	Marinobufagin	0.6	DB08059	Phosphatidylinositol 4,5-bisphosphate 3-kinase catalytic subunit alpha isoform	P42336	PK3CA_HUMAN	PIK3CA
P5	Marinobufagin	0.72	DB00374	Prostacyclin receptor	P43119	PI2R_HUMAN	PTGIR
P5	Marinobufagin	0.6275	DB01240	Prostacyclin receptor	P43119	PI2R_HUMAN	PTGIR
P5	Marinobufagin	0.6111	DB01088	Prostacyclin receptor	P43119	PI2R_HUMAN	PTGIR
P5	Marinobufagin	0.6042	DB05087	Gamma-aminobutyric acid receptor subunit alpha-2	P47869	GBRA2_HUMAN	GABRA2
P5	Marinobufagin	0.6038	DB04141	Cytochrome b-c1 complex subunit Rieske, mitochondrial	P47985	UCRI_HUMAN	UQCRFS1
P5	Marinobufagin	0.6042	DB05087	Gamma-aminobutyric acid receptor subunit alpha-4	P48169	GBRA4_HUMAN	GABRA4
P5	Marinobufagin	0.6	DB08059	Phosphatidylinositol 4,5-bisphosphate 3-kinase catalytic subunit gamma isoform	P48736	PK3CG_HUMAN	PIK3CG
P5	Marinobufagin	0.7083	DB02659	Gastrotropin	P51161	FABP6_HUMAN	FABP6
P5	Marinobufagin	0.6	DB02691	Gastrotropin	P51161	FABP6_HUMAN	FABP6
P5	Marinobufagin	0.6538	DB01046	Chloride channel protein 2	P51788	CLCN2_HUMAN	CLCN2
P5	Marinobufagin	0.6	DB01234	Nuclear receptor subfamily 0 group B member 1	P51843	NR0B1_HUMAN	NR0B1
P5	Marinobufagin	0.617	DB07447	3-oxo-5-beta-steroid 4-dehydrogenase	P51857	AK1D1_HUMAN	AKR1D1
P5	Marinobufagin	0.7083	DB01586	Aldo-keto reductase family 1 member C2	P52895	AK1C2_HUMAN	AKR1C2
P5	Marinobufagin	0.6	DB08059	Serine/threonine-protein kinase PLK1	P53350	PLK1_HUMAN	PLK1
P5	Marinobufagin	0.6129	DB01780	14-3-3 protein epsilon	P62258	1433E_HUMAN	YWHAE
P5	Marinobufagin	0.7083	DB02659	Estrogen-related receptor gamma	P62508	ERR3_HUMAN	ESRRG
P5	Marinobufagin	0.62	DB00163	Serine/threonine-protein phosphatase 2A catalytic subunit beta isoform	P62714	PP2AB_HUMAN	PPP2CB
P5	Marinobufagin	0.6038	DB03338	Peptidyl-prolyl cis-trans isomerase FKBP1A	P62942	FKB1A_HUMAN	FKBP1A
P5	Marinobufagin	0.62	DB00163	Serine/threonine-protein phosphatase 2A catalytic subunit alpha isoform	P67775	PP2AA_HUMAN	PPP2CA
P5	Marinobufagin	0.6383	DB07348	ADP-ribosylation factor 1	P84077	ARF1_HUMAN	ARF1
P5	Marinobufagin	0.7083	DB02659	Cytochrome c oxidase subunit 6A2, mitochondrial	Q02221	CX6A2_HUMAN	COX6A2
P5	Marinobufagin	0.72	DB00374	Peroxisome proliferator-activated receptor delta	Q03181	PPARD_HUMAN	PPARD
P5	Marinobufagin	0.6038	DB03338	Peroxisome proliferator-activated receptor delta	Q03181	PPARD_HUMAN	PPARD
P5	Marinobufagin	0.617	DB02854	Bile salt sulfotransferase	Q06520	ST2A1_HUMAN	SULT2A1
P5	Marinobufagin	0.6111	DB01088	cAMP-specific 3',5'-cyclic phosphodiesterase 4B	Q07343	PDE4B_HUMAN	PDE4B
P5	Marinobufagin	0.6038	DB03152	Protein-glutamine gamma-glutamyltransferase E	Q08188	TGM3_HUMAN	TGM3
P5	Marinobufagin	0.6111	DB01088	cAMP-specific 3',5'-cyclic phosphodiesterase 4C	Q08493	PDE4C_HUMAN	PDE4C
P5	Marinobufagin	0.6111	DB01088	cAMP-specific 3',5'-cyclic phosphodiesterase 4D	Q08499	PDE4D_HUMAN	PDE4D
P5	Marinobufagin	0.7347	DB07087	Nuclear receptor coactivator 2	Q15596	NCOA2_HUMAN	NCOA2
P5	Marinobufagin	0.6863	DB07707	Nuclear receptor coactivator 2	Q15596	NCOA2_HUMAN	NCOA2
P5	Marinobufagin	0.6458	DB06871	Nuclear receptor coactivator 2	Q15596	NCOA2_HUMAN	NCOA2
P5	Marinobufagin	0.64	DB07678	Nuclear receptor coactivator 2	Q15596	NCOA2_HUMAN	NCOA2
P5	Marinobufagin	0.6604	DB04652	Nuclear receptor coactivator 1	Q15788	NCOA1_HUMAN	NCOA1
P5	Marinobufagin	0.6346	DB08220	Nuclear receptor coactivator 1	Q15788	NCOA1_HUMAN	NCOA1
P5	Marinobufagin	0.6038	DB04141	Electron transfer flavoprotein-ubiquinone oxidoreductase, mitochondrial	Q16134	ETFD_HUMAN	ETFDH
P5	Marinobufagin	0.6042	DB05087	Gamma-aminobutyric acid receptor subunit alpha-6	Q16445	GBRA6_HUMAN	GABRA6
P5	Marinobufagin	0.6275	DB01240	Prostacyclin synthase	Q16647	PTGIS_HUMAN	PTGIS
P5	Marinobufagin	0.6275	DB02342	Hypoxia-inducible factor 1-alpha	Q16665	HIF1A_HUMAN	HIF1A
P5	Marinobufagin	0.6275	DB02342	Cytochrome P450 1B1	Q16678	CP1B1_HUMAN	CYP1B1
P5	Marinobufagin	0.6296	DB07815	Arylacetamide deacetylase-like 2	Q6P093	ADCL2_HUMAN	AADACL2
P5	Marinobufagin	0.7083	DB02659	Ferrochelatase	Q7KZA3	Q7KZA3_HUMAN	DKFZp686P18130
P5	Marinobufagin	0.7083	DB07690	Elongation factor Tu GTP-binding domain-containing protein 1	Q7Z2Z2	ETUD1_HUMAN	EFTUD1
P5	Marinobufagin	0.617	DB02854	Estradiol 17-beta-dehydrogenase 11	Q8NBQ5	DHB11_HUMAN	HSD17B11
P5	Marinobufagin	0.6596	DB00783	Estrogen receptor beta	Q92731	ESR2_HUMAN	ESR2
P5	Marinobufagin	0.6531	DB04573	Estrogen receptor beta	Q92731	ESR2_HUMAN	ESR2
P5	Marinobufagin	0.6531	DB07702	Estrogen receptor beta	Q92731	ESR2_HUMAN	ESR2
P5	Marinobufagin	0.617	DB03882	Estrogen receptor beta	Q92731	ESR2_HUMAN	ESR2
P5	Marinobufagin	0.6078	DB08020	Estrogen receptor beta	Q92731	ESR2_HUMAN	ESR2
P5	Marinobufagin	0.6071	DB01108	Estrogen receptor beta	Q92731	ESR2_HUMAN	ESR2
P5	Marinobufagin	0.7083	DB06777	Bile acid receptor	Q96RI1	NR1H4_HUMAN	NR1H4
P5	Marinobufagin	0.6346	DB08220	Bile acid receptor	Q96RI1	NR1H4_HUMAN	NR1H4
P5	Marinobufagin	0.6383	DB07348	Cytohesin-2	Q99418	CYH2_HUMAN	CYTH2
P5	Marinobufagin	0.6038	DB04141	Succinate dehydrogenase cytochrome b560 subunit, mitochondrial	Q99643	C560_HUMAN	SDHC
P5	Marinobufagin	0.72	DB00374	P2Y purinoceptor 12	Q9H244	P2Y12_HUMAN	P2RY12
P5	Marinobufagin	0.6275	DB01240	P2Y purinoceptor 12	Q9H244	P2Y12_HUMAN	P2RY12
P5	Marinobufagin	0.6531	DB07702	Nuclear receptor coactivator 5	Q9HCD5	NCOA5_HUMAN	NCOA5
P5	Marinobufagin	0.6038	DB04141	Cytochrome b-c1 complex subunit 9	Q9UDW1	QCR9_HUMAN	UQCR10
P5	Marinobufagin	0.62	DB00163	SEC14-like protein 4	Q9UDX3	S14L4_HUMAN	SEC14L4
P5	Marinobufagin	0.62	DB00163	SEC14-like protein 3	Q9UDX4	S14L3_HUMAN	SEC14L3
P7	19-Hydroxybufalin	0.64	DB04141	Succinate dehydrogenase [ubiquinone] cytochrome b small subunit, mitochondrial	O14521	DHSD_HUMAN	SDHD
P7	19-Hydroxybufalin	0.6066	DB00445	Chromodomain-helicase-DNA-binding protein 1	O14646	CHD1_HUMAN	CHD1
P7	19-Hydroxybufalin	0.64	DB04141	Cytochrome b-c1 complex subunit 8	O14949	QCR8_HUMAN	UQCRQ
P7	19-Hydroxybufalin	0.6333	DB00602	Glycine receptor subunit alpha-3	O75311	GLRA3_HUMAN	GLRA3
P7	19-Hydroxybufalin	0.7045	DB00783	Nuclear receptor subfamily 1 group I member 2	O75469	NR1I2_HUMAN	NR1I2
P7	19-Hydroxybufalin	0.6889	DB00977	Nuclear receptor subfamily 1 group I member 2	O75469	NR1I2_HUMAN	NR1I2
P7	19-Hydroxybufalin	0.6596	DB00163	Nuclear receptor subfamily 1 group I member 2	O75469	NR1I2_HUMAN	NR1I2
P7	19-Hydroxybufalin	0.6596	DB00163	SEC14-like protein 2	O76054	S14L2_HUMAN	SEC14L2
P7	19-Hydroxybufalin	0.6226	DB02587	Adenylate cyclase type 5	O95622	ADCY5_HUMAN	ADCY5
P7	19-Hydroxybufalin	0.64	DB04141	Cytochrome b	P00156	CYB_HUMAN	MT-CYB
P7	19-Hydroxybufalin	0.7556	DB02659	Alcohol dehydrogenase 1C	P00326	ADH1G_HUMAN	ADH1C
P7	19-Hydroxybufalin	0.625	DB07714	Glutathione reductase, mitochondrial	P00390	GSHR_HUMAN	GSR
P7	19-Hydroxybufalin	0.6222	DB01644	Glutathione reductase, mitochondrial	P00390	GSHR_HUMAN	GSR
P7	19-Hydroxybufalin	0.7556	DB02659	Cytochrome c oxidase subunit 1	P00395	COX1_HUMAN	MT-CO1
P7	19-Hydroxybufalin	0.7556	DB02659	Cytochrome c oxidase subunit 2	P00403	COX2_HUMAN	MT-CO2
P7	19-Hydroxybufalin	0.7556	DB02659	Cytochrome c oxidase subunit 3	P00414	COX3_HUMAN	MT-CO3
P7	19-Hydroxybufalin	0.6471	DB01088	Tissue-type plasminogen activator	P00750	TPA_HUMAN	PLAT
[truncated: 7,026 more rows]
