# Supplementary material for: Integrated network pharmacology and molecular docking approaches to reveal the synergistic mechanism of multiple components in Venenum Bufonis for ameliorating heart failure
Source: PeerJ. 2020 Oct 30;8:e10107. doi: 10.7717/peerj.10107 (PMC7605218; doi:10.7717/peerj.10107)
Supplement: Supplemental Information 3 [file peerj-08-10107-s003.xlsx]

## Sheet: Sheet1
Title: Integrated network pharmacology and molecular docking approaches to reveal the synergistic mechanism of multiple components in Venenum Bufonis for ameliorating heart failure Authors: Guohua Yu et al.
Table S3 HF associated genes
Known therapeutic targets from OMIM	Known therapeutic targets from Drugbank		Total HF associated genes after eliminating the redundancy
ADRB1	ACE		ADRA2C
ADRA2C	BDKRB1		GJA1
ACE	SLC12A1		AGTR1
HAND2	ADRB1		ADRB2
TTR	ATP1A1		KCNJ11
PLN	NR3C2		HIF1A
DMD	FXYD2		EDN1
HAND1	MME		HBB
TNNT2	AGTR1		NPPB
MYH7	SLC6A2		NPR1
EPHX2	TNNC1		CFTR
GRK2	PDE3A		MMP9
UTS2	EDNRA		REN
ATP2A2	NPR1		EDNRB
TPM1	ADORA1		HAND2
GNAQ	AVPR2		TTR
GJA1	HCN2		PLN
ILK	MT-CO1		DMD
MYBPC3	F2		HAND1
APOA1	REN		TNNT2
SCN5A	SCNN1G		MYH7
TNNI3	SLC12A3		EPHX2
CSRP3	ADRA1A		GRK2
PDPK1	SCNN1A		UTS2
LMNA	CA1		ATP2A2
RYR2	AOC3		TPM1
DSP	XDH		GNAQ
AGTR1	VEGFA		ILK
XBP1	EDN1		MYBPC3
ERN1	SERPINC1		APOA1
NRG1	SLC12A2		SCN5A
TAZ	ADRB2		TNNI3
AGT	AR		CSRP3
HEG1	SFRP4		PDPK1
SGCD	SLC6A3		LMNA
GRK5	KCNJ11		RYR2
MTTL1	PDE4B		DSP
YME1L1	NPR2		XBP1
IL6ST	AVPR1A		ERN1
GLA	NOX1		NRG1
CAMK2D	KCNMA1		TAZ
ADRB2	ADRA1B		AGT
CASP3	SCNN1B		HEG1
SAV1	CA2		SGCD
ACTC1	PPARG		GRK5
STAT3	ATP1A2		MTTL1
MYH6	MMP2		YME1L1
SRF	P4HA1		IL6ST
VCL	AGTR2		GLA
OPA1	EGFR		CAMK2D
PSEN2	EDNRB		CASP3
ABCC9	PGR		SAV1
FKTN	NR3C1		ACTC1
CDK9	CYP11B2		STAT3
KCNJ11	CYP17A1		MYH6
PRKCA	SHBG		SRF
SUMO1	NR1I2		VCL
EYA4	CA4		OPA1
OMA1	ADRA2A		PSEN2
TTN	SLC6A4		ABCC9
PPARGC1A	NFATC1		FKTN
TP53	TNF		CDK9
CMA1	NFKB1		PRKCA
CRIP1	IL2		SUMO1
FABP3	KCNJ8		EYA4
IMMT	NDUFC2		OMA1
CDH13	NPPB		TTN
WRB	GJA1		PPARGC1A
PCDH7	KCNH2		TP53
SLC4A4	VCAM1		CMA1
LRRC10	ADRA1D		CRIP1
LBH	ADRA2C		FABP3
SH3RF2	ADRA2B		IMMT
DES	SELE		CDH13
DICER1	HIF1A		WRB
TAB2	KCNJ4		PCDH7
FLNA	KCNJ2		SLC4A4
PTPN11	SLC18A2		LRRC10
RICTOR	ACHE		LBH
BAG3	PDE3B		SH3RF2
LDB3	NPR3		DES
MYLK3	HBA1		DICER1
CR1	HBB		TAB2
CR2	SCNN1D		FLNA
PIK3CG	ASIC2		PTPN11
LAMP2	AOC1		RICTOR
FKBP1B	ASIC1		BAG3
RAF1	SLC9A1		LDB3
JPH2	PLAU		MYLK3
RBM20	GPR35		CR1
ABCC6	CA9		CR2
SLC8B1	CA12		PIK3CG
HIF1A	CA14		LAMP2
SLN	CA3		FKBP1B
MTATP6	CA7		RAF1
ZC3H12A	AQP1		JPH2
MTATP8	SLC12A4		RBM20
HSD11B2	SLC12A5		ABCC6
GPR14	CFTR		SLC8B1
ZFPM2	LEF1		SLN
CCL2	GSTP1		MTATP6
PPP1CA	ATP1A3		ZC3H12A
BMPR2	MMP9		MTATP8
SHOC2	LTA4H		HSD11B2
RTTN	PTK6		GPR14
HRAS	TEK		ZFPM2
IGF1R	RET		CCL2
TFAM	TFPI		PPP1CA
NEXN	SELP		BMPR2
TRIM63			SHOC2
ABCA1			RTTN
RXRA			HRAS
PSEN1			IGF1R
EDN1			TFAM
PDCD1			NEXN
HAMP			TRIM63
IGHMBP2			ABCA1
HBB			RXRA
SLC18A3			PSEN1
NKX2-5			PDCD1
TBX20			HAMP
ITGB1BP2			IGHMBP2
FOXC1			SLC18A3
TK2			NKX2-5
SLC22A5			TBX20
ERBB2			ITGB1BP2
MED1			FOXC1
NDUFB11			TK2
GPX1			SLC22A5
PRDM16			ERBB2
SLC8A1			MED1
UMOD			NDUFB11
YAP1			GPX1
NPPB			PRDM16
NPR1			SLC8A1
SIRT7			UMOD
PVALB			YAP1
MYL3			SIRT7
ACTN2			PVALB
LAMA4			MYL3
CFTR			ACTN2
MTTF			LAMA4
CDK5RAP3			MTTF
CTF1			CDK5RAP3
SPRY1			CTF1
MMP9			SPRY1
HOPX			HOPX
CAMK2A			CAMK2A
ALPK3			ALPK3
TCAP			TCAP
CELF1			CELF1
APLNR			APLNR
FLNC			FLNC
PPP3CA			PPP3CA
CRYAB			CRYAB
CD36			CD36
PNPLA2			PNPLA2
PPM1K			PPM1K
PAX3			PAX3
TNFRSF11B			TNFRSF11B
FOXP3			FOXP3
RBM15			RBM15
KLF2			KLF2
TMPO			TMPO
DAG1			DAG1
ANKRD1			ANKRD1
FOXO1A			FOXO1A
IFNG			IFNG
MAP3K5			MAP3K5
CNOT3			CNOT3
SMAD9			SMAD9
TRPC6			TRPC6
APLN			APLN
REN			ATP8B1
ATP8B1			TNFSF12
TNFSF12			IL17A
IL17A			SELENON
SELENON			GLB1
GLB1			TICAM1
TICAM1			PPARD
PPARD			DSG2
DSG2			HDAC3
HDAC3			XRCC1
XRCC1			LIG3
LIG3			NRAP
NRAP			TLR9
TLR9			PUMA
PUMA			HPGD
HPGD			ENPP1
EDNRB			E2F3
ENPP1			SMAD1
E2F3			IDUA
SMAD1			CD40LG
IDUA			MTTH
CD40LG			MTTL2
MTTH			NNMT
MTTL2			SLC25A37
NNMT			ACE
SLC25A37			BDKRB1
			SLC12A1
			ADRB1
			ATP1A1
			NR3C2
			FXYD2
			MME
			SLC6A2
			TNNC1
			PDE3A
			EDNRA
			ADORA1
			AVPR2
			HCN2
			MT-CO1
			F2
			SCNN1G
			SLC12A3
			ADRA1A
			SCNN1A
			CA1
			AOC3
			XDH
			VEGFA
			SERPINC1
			SLC12A2
			AR
			SFRP4
			SLC6A3
			PDE4B
			NPR2
			AVPR1A
			NOX1
			KCNMA1
			ADRA1B
			SCNN1B
			CA2
			PPARG
			ATP1A2
			MMP2
			P4HA1
			AGTR2
			EGFR
			PGR
			NR3C1
			CYP11B2
			CYP17A1
			SHBG
			NR1I2
			CA4
			ADRA2A
			SLC6A4
			NFATC1
			TNF
			NFKB1
			IL2
			KCNJ8
			NDUFC2
			KCNH2
			VCAM1
			ADRA1D
			ADRA2B
			SELE
			KCNJ4
			KCNJ2
			SLC18A2
			ACHE
			PDE3B
			NPR3
			HBA1
			SCNN1D
			ASIC2
			AOC1
			ASIC1
			SLC9A1
			PLAU
			GPR35
			CA9
			CA12
			CA14
			CA3
			CA7
			AQP1
			SLC12A4
			SLC12A5
			LEF1
			GSTP1
			ATP1A3
			LTA4H
			PTK6
			TEK
			RET
			TFPI
			SELP
