# Supplementary material for: Integrated network pharmacology and molecular docking approaches to reveal the synergistic mechanism of multiple components in Venenum Bufonis for ameliorating heart failure
Source: PeerJ. 2020 Oct 30;8:e10107. doi: 10.7717/peerj.10107 (PMC7605218; doi:10.7717/peerj.10107)
Supplement: Supplemental Information 4 [file peerj-08-10107-s004.xlsx]

## Sheet: Sheet1
Title: Integrated network pharmacology and molecular docking approaches to reveal the synergistic mechanism of multiple components in Venenum Bufonis for ameliorating heart failure Authors: Guohua Yu et al.
Table S4 PPI between VB-related targets and HF-related targets
Node1	Node2	Source	Combined Score		Node
CYC1	UQCRFS1	0.999	STRING database		CYC1
MT-CYB	UQCRFS1	0.999	STRING database		MT-CYB
UQCRB	UQCRH	0.999	STRING database		UQCRB
COX4I1	COX5B	0.999	STRING database		COX4I1
MT-CO2	MT-CYB	0.999	STRING database		MT-CO2
MT-CO2	MT-CO1	0.999	STRING database		UQCRQ
UQCRQ	UQCRH	0.999	STRING database		ATP5C1
ATP5C1	ATP5B	0.999	STRING database		COX7C
COX7C	COX5B	0.999	STRING database		FKBP1A
UQCRB	UQCRC2	0.999	STRING database		SDHD
FKBP1A	MTOR	0.999	STRING database		UQCRFS1
UQCRB	MT-CYB	0.999	STRING database		COX5A
SDHD	SDHB	0.999	STRING database		MT-CO3
UQCRQ	MT-CYB	0.999	STRING database		EDN1
UQCRFS1	UQCRC1	0.999	STRING database		COX6C
COX5A	COX5B	0.999	STRING database		UQCR10
MT-CO2	COX6B1	0.999	STRING database		SERPINE1
MT-CO3	MT-CYB	0.999	STRING database		UQCRH
CYC1	UQCRH	0.999	STRING database		TUBB
MT-CYB	CYC1	0.999	STRING database		SDHC
EDN1	EDNRA	0.999	STRING database		TUBA1B
COX6C	COX5B	0.999	STRING database		ESRRA
UQCR10	UQCRC1	0.999	STRING database		TUBB4B
SERPINE1	PLAT	0.999	STRING database		UQCRC2
SDHD	SDHA	0.999	STRING database		PLAU
UQCRB	UQCR10	0.999	STRING database		COX5B
UQCRH	UQCRC2	0.999	STRING database		SDHB
COX5A	COX6B1	0.999	STRING database		ITGB2
TUBB	TUBA1B	0.999	STRING database		NCOA2
SDHC	SDHA	0.999	STRING database		MT-ATP6
TUBA1B	TUBA1A	0.999	STRING database		HBB
MT-CO3	MT-CO1	0.999	STRING database		PIK3R1
ESRRA	PPARGC1A	0.999	STRING database		FKBP1B
UQCR10	CYC1	0.999	STRING database		PPARG
TUBB4B	TUBA1B	0.999	STRING database		TNNI3
COX4I1	COX6C	0.999	STRING database		ATP5A1
UQCRC2	UQCRC1	0.999	STRING database		ORM2
MT-CO3	MT-ATP6	0.999	STRING database		ARF1
UQCRQ	UQCRC2	0.999	STRING database		MTOR
UQCR10	UQCRFS1	0.999	STRING database		PDK3
PLAU	SERPINE1	0.999	STRING database		EGFR
COX5B	COX6B1	0.999	STRING database		NFATC1
COX7C	UQCRQ	0.999	STRING database		TUBB3
UQCR10	UQCRH	0.999	STRING database		PSEN2
UQCRB	UQCRFS1	0.999	STRING database		TTN
MT-CO2	COX5B	0.999	STRING database		CACNB1
UQCRB	CYC1	0.999	STRING database		NCOA1
SDHB	SDHC	0.999	STRING database		CAMK2A
COX6C	COX6B1	0.999	STRING database		TPM1
COX6C	MT-CO2	0.999	STRING database		DAG1
ITGB2	ITGAL	0.999	STRING database		RXRA
SDHD	SDHC	0.999	STRING database		ACTN2
SDHB	SDHA	0.999	STRING database		CACNB2
MT-CO2	COX5A	0.999	STRING database		ESR1
COX4I1	MT-CO2	0.999	STRING database		MT-CO1
UQCRQ	CYC1	0.999	STRING database		CACNA2D1
NCOA2	AR	0.999	STRING database		COX6A2
MT-ATP6	MT-CYB	0.999	STRING database		MYH6
COX7C	MT-CO2	0.999	STRING database		PTPN11
EDN1	EDNRB	0.999	STRING database		APLNR
HBB	HBA1	0.999	STRING database		AGT
UQCRH	UQCRFS1	0.999	STRING database		AGTR1
MT-CYB	MT-CO1	0.999	STRING database		ATP1A1
UQCRFS1	UQCRC2	0.999	STRING database		MT-ATP8
PIK3R1	PIK3CA	0.999	STRING database		AKR1C1
UQCRH	UQCRC1	0.999	STRING database		UTS2R
UQCR10	UQCRC2	0.999	STRING database		DSP
UQCRQ	UQCR10	0.999	STRING database		NR1H4
CYC1	UQCRC1	0.999	STRING database		CDK9
UQCRB	UQCRQ	0.999	STRING database		PPARA
FKBP1B	RYR2	0.999	STRING database		NRG1
PPARG	PPARGC1A	0.999	STRING database		CACNA2D2
COX6C	COX7C	0.999	STRING database		AGTR2
MT-CYB	UQCRH	0.999	STRING database		IL17A
COX4I1	COX5A	0.999	STRING database		COX7B
TNNI3	TNNC1	0.999	STRING database		CYP17A1
UQCRQ	UQCRC1	0.999	STRING database		PPP1CC
UQCRQ	UQCRFS1	0.999	STRING database		MYBPC3
ATP5A1	ATP5B	0.999	STRING database		HAND2
CYC1	UQCRC2	0.999	STRING database		CACNB4
UQCRB	UQCRC1	0.999	STRING database		GABRG2
ATP5A1	ATP5C1	0.999	STRING database		GRIN2B
COX7C	COX5A	0.999	STRING database		GRIN2A
MT-CO3	MT-CO2	0.999	STRING database		PPP2CA
ORM2	ORM1	0.999	STRING database		ADRBK1
ARF1	CYTH2	0.999	STRING database		OPRM1
MTOR	RICTOR	0.999	STRING database		HSD3B2
COX6C	COX5A	0.999	STRING database		STAT3
PDK3	DLAT	0.998	STRING database		CACNA1S
ATP5A1	MT-ATP6	0.998	STRING database		HIF1A
EGFR	STAT3	0.998	STRING database		CACNA1B
MT-CYB	UQCR10	0.998	STRING database		YWHAE
NCOA2	NR3C1	0.998	STRING database		GABRA1
NFATC1	PPP3CA	0.998	STRING database		COX8A
TUBA1B	TUBB3	0.998	STRING database		VDR
TUBB3	TUBA1A	0.998	STRING database		CACNA2D3
UQCRQ	COX5B	0.998	STRING database		SHOC2
MT-CYB	UQCRC2	0.998	STRING database		IL6ST
PSEN2	PSEN1	0.998	STRING database		TNNT2
NCOA2	PPARG	0.998	STRING database		POMC
TTN	TCAP	0.998	STRING database		HDAC2
CACNB1	CACNA2D1	0.998	STRING database		DMD
COX7C	COX6B1	0.998	STRING database		CYP19A1
TUBB4B	TUBB	0.998	STRING database		ERBB2
NCOA1	PPARG	0.998	STRING database		CACNA1F
MT-CO2	MT-ATP6	0.998	STRING database		NOXO1
TNNI3	TNNT2	0.998	STRING database		RARG
CAMK2A	CAMK2D	0.998	STRING database		TP53
MT-CYB	UQCRC1	0.998	STRING database		NKX2-5
TPM1	ACTC1	0.997	STRING database		ERN1
DAG1	DMD	0.997	STRING database		AKR1C3
UQCRFS1	COX5B	0.997	STRING database		AKR1C2
CYC1	COX5B	0.997	STRING database		MYL3
RXRA	NCOA2	0.997	STRING database		HSD17B1
UQCRQ	COX5A	0.997	STRING database		CNR1
CYC1	ATP5B	0.997	STRING database		CACNA1D
RXRA	NCOA1	0.997	STRING database		SUMO1
RXRA	PPARG	0.997	STRING database		ILK
ACTN2	MYH6	0.997	STRING database		ACTA1
CACNB2	CACNA1C	0.997	STRING database		MED1
CACNB1	CACNG1	0.997	STRING database		CACNB3
COX5A	CYC1	0.997	STRING database		CACNA1A
ESR1	NCOA1	0.997	STRING database		GABRA5
COX5A	COX6A2	0.997	STRING database		FGF1
MT-CO1	UQCRC2	0.997	STRING database		PTGS1
MT-CO3	COX5A	0.997	STRING database		SMAD9
CACNA2D1	CACNG1	0.996	STRING database		MTTP
COX6A2	COX5B	0.996	STRING database		LPL
COX4I1	COX6B1	0.996	STRING database		SLC25A4
UQCRB	COX5A	0.996	STRING database		PTGS2
COX4I1	COX7C	0.996	STRING database		TUBA1A
MYH6	TPM1	0.996	STRING database		TFAM
COX5A	UQCRFS1	0.996	STRING database		HCK
MT-CO1	COX5A	0.996	STRING database		SRD5A1
PTPN11	EGFR	0.996	STRING database		BBC3
APLNR	APLN	0.996	STRING database		GNAS
MT-ATP6	ATP5B	0.996	STRING database		GABRA2
AGT	ACE	0.996	STRING database		SERPINC1
MT-ATP6	ATP5C1	0.996	STRING database		AR
MT-ATP6	MT-CO1	0.996	STRING database		SERPINA1
AGTR1	AGT	0.996	STRING database		GABRB2
ATP1A1	FXYD2	0.995	STRING database		ATP2A2
UQCR10	COX5A	0.995	STRING database		HOPX
TUBB	TUBA1A	0.995	STRING database		YAP1
UQCRB	COX5B	0.995	STRING database		GRIN1
MT-ATP8	MT-ATP6	0.995	STRING database		PRKCD
TUBA1B	TUBA1C	0.995	STRING database		ALOX5
ESR1	NCOA2	0.995	STRING database		FGF2
COX5A	UQCRC2	0.995	STRING database		PPARGC1A
ACTN2	TPM1	0.995	STRING database		GNAQ
COX6C	UQCRQ	0.995	STRING database		GLB1
MT-CO2	UQCRC2	0.995	STRING database		SRD5A2
CACNA2D1	CACNB2	0.995	STRING database		RET
AKR1C1	AKR1C3	0.995	STRING database		HSD3B1
COX6C	COX6A2	0.995	STRING database		IMPDH1
CACNB1	CACNA1D	0.995	STRING database		OMA1
MT-CO1	UQCRFS1	0.994	STRING database		METAP2
PTPN11	ERBB2	0.994	STRING database		ATP1A3
UTS2R	UTS2	0.994	STRING database		CYP1B1
DSP	DSG2	0.994	STRING database		SDHA
PIK3R1	EGFR	0.994	STRING database		PNPLA2
MT-CO1	COX5B	0.994	STRING database		ATP1A2
NR1H4	NCOA1	0.994	STRING database		TCAP
CDK9	MED1	0.994	STRING database		MME
NCOA1	ESR2	0.994	STRING database		ADCY5
PPARA	PPARGC1A	0.994	STRING database		HSP90AB1
UQCRC2	COX5B	0.994	STRING database		PTK6
UQCR10	COX5B	0.994	STRING database		NR0B1
NRG1	EGFR	0.994	STRING database		APCS
PPARA	NCOA1	0.993	STRING database		TUBA1C
CACNA2D2	CACNG1	0.993	STRING database		GABRB3
AGTR2	AGT	0.993	STRING database		ACTC1
COX6C	COX7B	0.993	STRING database		CYP1A1
IL17A	STAT3	0.993	STRING database		ESR2
COX7B	COX5B	0.993	STRING database		TUBB4A
CYP17A1	HSD3B1	0.993	STRING database		GABRB1
UQCRQ	COX6A2	0.993	STRING database		ATP5B
PPP1CC	PPP1CA	0.993	STRING database		CNR2
TPM1	TNNT2	0.993	STRING database		RAF1
MYBPC3	TNNT2	0.992	STRING database		SMAD1
MYBPC3	MYH6	0.992	STRING database		CSRP3
MT-CO3	COX5B	0.992	STRING database		G6PD
COX7C	COX7B	0.992	STRING database		FOXO1
NRG1	ERBB2	0.992	STRING database		LMNA
MT-CO2	UQCRFS1	0.992	STRING database		GABRA3
ACTN2	VCL	0.992	STRING database		NR3C1
HAND2	NKX2-5	0.992	STRING database		HDAC3
CACNB1	CACNA1C	0.992	STRING database		PRKCA
NR1H4	RXRA	0.992	STRING database		SCNN1B
COX4I1	MT-CO1	0.992	STRING database		PGR
CACNB4	CACNA1A	0.991	STRING database		RYR2
GABRG2	GABRA1	0.991	STRING database		TOP2A
PTPN11	STAT3	0.991	STRING database		TEK
AKR1C1	AKR1C2	0.991	STRING database		FOXP3
CACNB2	CACNA1D	0.991	STRING database		NOS2
COX7B	COX6B1	0.991	STRING database		CACNA1C
GRIN2B	GRIN1	0.991	STRING database		CD36
MYH6	TNNT2	0.991	STRING database		SCNN1A
GRIN2A	GRIN1	0.99	STRING database		TUBA3C
UQCRB	COX7C	0.99	STRING database		EDNRB
TTN	ACTN2	0.99	STRING database		PIM1
TUBB	TUBA4A	0.99	STRING database		APLN
MYH6	MYL3	0.99	STRING database		CEL
TUBB4B	TUBA1A	0.99	STRING database		GABRQ
PPP2CA	PPP2CB	0.99	STRING database		SPRY1
CACNB1	CACNA1S	0.99	STRING database		HSD11B1
EGFR	PIK3CA	0.99	STRING database		SLC9A1
SDHB	UQCRC2	0.99	STRING database		MAPK1
TUBB3	TUBA1C	0.99	STRING database		PLK1
ADRBK1	SMO	0.99	STRING database		PRLR
TUBB4B	TUBA4A	0.989	STRING database		TOP2B
OPRM1	POMC	0.989	STRING database		SCNN1D
UQCRQ	COX6B1	0.989	STRING database		CYP2B6
COX4I1	MT-CO3	0.989	STRING database		CASP3
HSD3B2	CYP17A1	0.989	STRING database		EDNRA
CACNA2D2	CACNB1	0.989	STRING database		ADH1C
STAT3	MAPK1	0.989	STRING database		DES
RXRA	MED1	0.989	STRING database		NDUFB11
COX4I1	UQCRFS1	0.989	STRING database		PRKCB
COX7C	MT-CO3	0.989	STRING database		NR3C2
COX5B	UQCRC1	0.989	STRING database		GABRG3
COX7B	COX5A	0.989	STRING database		AOC3
MTOR	STAT3	0.989	STRING database		ORM1
CACNA1S	CACNB2	0.989	STRING database		SLN
GABRG2	GABRB2	0.989	STRING database		TUBA8
MT-CO3	UQCRFS1	0.988	STRING database		PTGFR
NCOA1	NR3C1	0.988	STRING database		TUBA4A
HIF1A	CA9	0.988	STRING database		COX7A1
PIK3R1	ERBB2	0.988	STRING database		CD40LG
CACNA1B	CACNB3	0.988	STRING database		TAB2
TUBB3	TUBA4A	0.988	STRING database		KCNJ4
NR1H4	MED1	0.988	STRING database		COMT
YWHAE	RAF1	0.988	STRING database		OPRK1
COX7C	UQCRFS1	0.988	STRING database		CYTH2
GABRA1	GABRB2	0.988	STRING database		ANXA1
COX8A	COX5B	0.988	STRING database		PLA2G1B
VDR	MED1	0.988	STRING database		GRK5
CACNA2D3	CACNG1	0.988	STRING database		CDA
SHOC2	PPP1CC	0.987	STRING database		GRIN3A
COX7C	MT-CO1	0.987	STRING database		PPARD
COX6A2	COX6B1	0.987	STRING database		TAZ
UQCRB	COX6C	0.987	STRING database		GABRA6
PTPN11	MAPK1	0.987	STRING database		SRD5A3
IL6ST	STAT3	0.987	STRING database		CYP2C8
NCOA1	AR	0.987	STRING database		PTGER3
CACNA2D1	CACNA1D	0.987	STRING database		ADRB1
TNNT2	TNNC1	0.987	STRING database		PTGER4
RXRA	RARG	0.987	STRING database		AOC1
MYH6	TNNI3	0.987	STRING database		LAMP2
ACTN2	TNNT2	0.987	STRING database		VKORC1
TPM1	TNNI3	0.986	STRING database		PIK3CG
POMC	OPRL1	0.986	STRING database		TRPC6
POMC	OPRD1	0.986	STRING database		TTR
POMC	OPRK1	0.986	STRING database		CYP11B2
MTOR	EGFR	0.986	STRING database		PPP2CB
HDAC2	TP53	0.986	STRING database		ACACB
DMD	SGCD	0.986	STRING database		PIK3CA
AKR1C1	AKR1D1	0.986	STRING database		PPP1CA
CYP19A1	HSD3B1	0.986	STRING database		SHBG
CACNA2D2	CACNB2	0.986	STRING database		BMPR2
HIF1A	STAT3	0.986	STRING database		PPP3CA
ERBB2	PIK3CA	0.986	STRING database		ADCY2
MYBPC3	TNNI3	0.986	STRING database		TBX20
CACNA1F	CACNB2	0.986	STRING database		CCKAR
NOXO1	NOX1	0.986	STRING database		CHD1
RARG	NCOA1	0.986	STRING database		ESRRG
COX4I1	COX7B	0.986	STRING database		SAV1
TP53	STAT3	0.986	STRING database		CNOT3
COX7C	UQCR10	0.986	STRING database		PTGER1
NKX2-5	SRF	0.986	STRING database		OPRL1
CACNB1	CACNA1F	0.986	STRING database		P2RY12
COX5A	UQCRC1	0.986	STRING database		CAMK2D
UQCRFS1	SDHA	0.986	STRING database		HSP90B1
GABRG2	GABRA5	0.986	STRING database		GRIN2C
COX7C	COX6A2	0.985	STRING database		PTGIR
ERN1	XBP1	0.985	STRING database		SLC18A3
AKR1C3	AKR1D1	0.985	STRING database		COX6B1
TP53	MAPK1	0.985	STRING database		SCNN1G
AKR1C2	AKR1C3	0.985	STRING database		GLA
MYL3	TNNI3	0.985	STRING database		OPRD1
ATP5A1	UQCRC2	0.985	STRING database		ANKRD1
HSD17B1	CYP19A1	0.984	STRING database		BDKRB1
COX7C	COX8A	0.984	STRING database		CACNA1H
GABRG2	GABRB3	0.984	STRING database		PFN1
UQCRFS1	COX6B1	0.984	STRING database		GLRA3
CNR1	OPRL1	0.984	STRING database		SLC25A37
SDHB	UQCRFS1	0.984	STRING database		CA2
ATP5C1	UQCRC2	0.984	STRING database		KCNMA1
CACNA1D	CACNG1	0.984	STRING database		PDE4A
SUMO1	TP53	0.984	STRING database		FLNA
GABRG2	GABRA6	0.984	STRING database		TRIM13
AGT	CMA1	0.983	STRING database		GABRD
MYL3	TNNT2	0.983	STRING database		NR1I3
MT-CO3	UQCRC2	0.983	STRING database		PDE4D
CACNB4	CACNA2D2	0.983	STRING database		ACE
ILK	RICTOR	0.983	STRING database		SIRT7
ESR1	PPARGC1A	0.983	STRING database		ACSL4
UQCR10	COX6A2	0.983	STRING database		HAMP
CNR1	OPRD1	0.983	STRING database		GABRG1
CACNA2D1	CACNA1C	0.983	STRING database		IMMT
ACTN2	LDB3	0.983	STRING database		CACNA1I
COX4I1	CYC1	0.983	STRING database		GABRE
COX4I1	COX6A2	0.982	STRING database		SLC4A4
COX5A	UQCRH	0.982	STRING database		OPA1
ACTA1	VCL	0.982	STRING database		CACNA1G
POMC	STAT3	0.982	STRING database		NR1I2
MED1	PPARG	0.982	STRING database		CRYAB
EDN1	AGT	0.981	STRING database		SOAT1
TTN	MYH6	0.981	STRING database		GRIN2D
GABRG2	GABRA4	0.981	STRING database		ANXA5
CACNB3	CACNA1C	0.981	STRING database		DICER1
CACNA1A	CACNB3	0.981	STRING database		SOAT2
CACNB4	CACNA2D1	0.981	STRING database		PLN
COX8A	COX6B1	0.981	STRING database		PAX3
GABRA5	GABRB3	0.981	STRING database		IL1B
CACNA2D1	CACNB3	0.981	STRING database		SLC12A1
FGF1	FGF2	0.981	STRING database		FABP6
PIK3R1	PIK3CG	0.981	STRING database		SLC8A1
PTGS1	PTGIS	0.981	STRING database		PDE4C
MYBPC3	MYL3	0.981	STRING database		CTF1
SMAD9	BMPR2	0.98	STRING database		LDB3
MTTP	APOA1	0.98	STRING database		FOXC1
ACTA1	PFN1	0.98	STRING database		CA9
LPL	PPARG	0.98	STRING database		SELP
SLC25A4	ATP5B	0.98	STRING database		JPH2
PTGS2	STAT3	0.98	STRING database		SLC12A5
TUBA1A	TUBA4A	0.98	STRING database		TNFRSF11B
STAT3	FGF2	0.98	STRING database		CD1D
AGTR1	ADRBK1	0.98	STRING database		BAG3
GABRG2	GABRB1	0.98	STRING database		SLC12A3
GRIN2B	CAMK2A	0.98	STRING database		DLAT
MYBPC3	TPM1	0.98	STRING database		GABRP
CACNA2D3	CACNB1	0.98	STRING database		GABRR1
GABRA5	GABRB2	0.98	STRING database		TRIM63
TFAM	PPARGC1A	0.979	STRING database		PCDH7
ADRBK1	GNAQ	0.979	STRING database		PRDM16
HCK	ITGB2	0.979	STRING database		PSEN1
CAMK2A	GRIN1	0.979	STRING database		GRIN3B
SRD5A1	SRD5A3	0.979	STRING database		ITGAL
AGTR1	GRK5	0.979	STRING database		FABP3
COX6C	MT-CO3	0.979	STRING database		SLC29A1
MYL3	TPM1	0.979	STRING database		AQP1
GABRA1	GABRB3	0.979	STRING database		SEC14L4
UQCRC2	ATP5B	0.978	STRING database		SEC14L2
BBC3	TP53	0.978	STRING database		RPL3
GNAS	ADCY2	0.978	STRING database		RBM20
CACNA1A	CACNB2	0.978	STRING database		TFPI
GABRA2	GABRG2	0.978	STRING database		RICTOR
PIK3R1	STAT3	0.978	STRING database		NOX1
GABRA5	GABRB1	0.978	STRING database		MAP3K5
SERPINC1	APOA1	0.978	STRING database		SRF
GABRA1	GABRB1	0.978	STRING database		DGKA
TUBB	TUBA1C	0.978	STRING database		ETFDH
TUBB4B	TUBA1C	0.978	STRING database		LEF1
HSD3B2	CYP11B2	0.977	STRING database		CELF1
MT-ATP8	ATP5B	0.977	STRING database		SLC8B1
MT-CO3	COX6B1	0.977	STRING database		SGCD
GABRG2	GABRA3	0.977	STRING database		FLNC
AR	HSP90AB1	0.977	STRING database		PDE4B
HIF1A	TP53	0.977	STRING database		ZC3H12A
ESR1	PIK3CA	0.977	STRING database		CLCN2
COX7C	UQCRH	0.976	STRING database		KLF2
SERPINA1	ORM1	0.976	STRING database		ASIC1
TTN	MYL3	0.976	STRING database		GABRA4
GABRB2	GABRA6	0.976	STRING database		FXYD2
FKBP1A	PPP3CA	0.976	STRING database		CACNG1
ATP2A2	PLN	0.976	STRING database		CA14
HCK	EGFR	0.975	STRING database		CES1
HOPX	SRF	0.975	STRING database		ZFPM2
YAP1	SAV1	0.975	STRING database		SIGMAR1
GRIN1	GRIN2D	0.975	STRING database		HMGCR
UQCRFS1	ATP5B	0.975	STRING database		MYLK3
PRKCD	PRKCB	0.975	STRING database		CR1
ALOX5	PTGS2	0.975	STRING database		NPR2
CAMK2A	GRIN2A	0.975	STRING database		SEPN1
CACNB4	CACNG1	0.975	STRING database		ATP8B1
ESR1	MED1	0.975	STRING database		NEXN
COX4I1	UQCR10	0.975	STRING database		NRAP
RXRA	PPARGC1A	0.974	STRING database		ITGB1BP2
PTGS2	IL1B	0.974	STRING database		EYA4
PPARG	TP53	0.974	STRING database		CR2
FGF2	MAPK1	0.974	STRING database		IDUA
TTN	TNNT2	0.974	STRING database		PLAT
PTGS2	PTGIS	0.974	STRING database		CA1
CACNA2D2	CACNA1A	0.974	STRING database		CA7
VDR	NCOA1	0.974	STRING database		RHO
CACNA1F	CACNA2D1	0.974	STRING database		SLC12A2
PPARGC1A	NR3C1	0.974	STRING database		CA4
GNAQ	PIK3CA	0.974	STRING database		APOA1
CACNA1S	CACNA2D1	0.974	STRING database		PDCD1
TTN	TNNI3	0.974	STRING database		LRRC10
HSD3B2	CYP19A1	0.973	STRING database		FECH
ATP5A1	SLC25A4	0.973	STRING database		SFRP4
NR1H4	FABP6	0.973	STRING database		DSG2
GLB1	GLA	0.973	STRING database		CA3
COX4I1	UQCRC2	0.973	STRING database		KCNJ2
COX4I1	UQCRQ	0.973	STRING database		RBM15
COX4I1	UQCRB	0.973	STRING database		UMOD
SRD5A2	CYP17A1	0.973	STRING database		ALPK3
ALOX5	PTGS1	0.973	STRING database		GAPDHS
RET	PTPN11	0.973	STRING database		SLC12A4
COX6A2	UQCRC2	0.973	STRING database		GLRA2
HIF1A	EGFR	0.973	STRING database		PTGR1
DAG1	SGCD	0.973	STRING database		GPR35
PRKCD	TP53	0.973	STRING database		ABO
TTN	DMD	0.972	STRING database		GSR
AKR1C3	SRD5A1	0.972	STRING database		CDK5RAP3
CYP17A1	SRD5A1	0.972	STRING database		PPM1K
PIK3R1	PTPN11	0.972	STRING database		HBA1
GRIN1	GRIN2C	0.972	STRING database		TGM3
HSD3B1	CYP11B2	0.972	STRING database		HIBCH
COX6C	UQCR10	0.972	STRING database		CYP2C9
ESR1	MAPK1	0.971	STRING database		P4HA1
CACNB4	CACNA1C	0.971	STRING database		LBH
NCOA2	ESR2	0.971	STRING database		TK2
TP53	NR3C1	0.971	STRING database		CRIP1
GRIN1	GRIN3A	0.971	STRING database		HSD17B11
IMPDH1	IMPDH2	0.971	STRING database		ALDH2
CACNB4	CACNA1S	0.971	STRING database		TMPO
CACNB4	CACNA2D3	0.971	STRING database		VCL
EGFR	ERBB2	0.971	STRING database		YME1L1
LPL	APOA1	0.971	STRING database		HEG1
OMA1	OPA1	0.971	STRING database		UQCRC1
NKX2-5	HAND1	0.971	STRING database		TNNC1
UQCRQ	NDUFB11	0.97	STRING database		UTS2
SERPINA1	APOA1	0.97	STRING database		SMO
HSD3B1	SRD5A1	0.97	STRING database		AKR1D1
EDN1	MAPK1	0.97	STRING database		XBP1
MYBPC3	TCAP	0.97	STRING database		CMA1
MYH6	ACTC1	0.97	STRING database		PTGIS
METAP2	METAP1	0.97	STRING database		IMPDH2
CACNA1S	CACNG1	0.97	STRING database		HAND1
MYH6	TNNC1	0.97	STRING database		METAP1
ATP1A3	FXYD2	0.97	STRING database		TUBB1
CYP1B1	COMT	0.97	STRING database		LAMA4
GABRB2	GABRA4	0.97	STRING database		SULT2A1
SDHA	ATP5B	0.97	STRING database		FGF4
HSD3B2	SRD5A1	0.97	STRING database		TNFSF12
COX4I1	COX8A	0.969	STRING database		SULT2B1
PTPN11	PDCD1	0.969	STRING database		TICAM1
ACTN2	ACTA1	0.969	STRING database		E2F3
ACTN2	TCAP	0.969	STRING database		RORA
AGTR1	EDN1	0.969	STRING database		PTGER2
SRD5A2	HSD3B2	0.969	STRING database		CYP27B1
PNPLA2	LPL	0.969	STRING database		FKTN
CACNB3	CACNA1D	0.969	STRING database		PVALB
TPM1	VCL	0.969	STRING database		NCOA5
ATP1A2	FXYD2	0.968	STRING database		XRCC1
TCAP	TNNT2	0.968	STRING database		ABCC6
MYL3	TCAP	0.968	STRING database		SEC14L3
SHOC2	RAF1	0.968	STRING database		EFTUD1
CACNA2D3	CACNA1A	0.968	STRING database		CA12
RET	PIK3CA	0.968	STRING database		ASIC2
MME	AGT	0.968	STRING database		NPR3
ACTN2	MYL3	0.968	STRING database		SLC22A5
PPP1CC	PLK1	0.968	STRING database		RTTN
ADCY5	GNAS	0.968	STRING database		IGHMBP2
HSP90AB1	NR3C1	0.968	STRING database		CDH13
CACNA2D2	CACNB3	0.968	STRING database		HS3ST3A1
MYH6	TCAP	0.968	STRING database		UGT3A1
PTK6	STAT3	0.968	STRING database		S100P
COX4I1	UQCRC1	0.968	STRING database
SHOC2	PPP1CA	0.968	STRING database
ACTA1	DMD	0.968	STRING database
NR0B1	AR	0.968	STRING database
APCS	TTR	0.967	STRING database
TUBA1C	TUBB4A	0.967	STRING database
GABRB3	GABRA6	0.967	STRING database
HSD3B2	AKR1C3	0.967	STRING database
COX8A	COX5A	0.967	STRING database
CYC1	SDHA	0.967	STRING database
ACTC1	TNNT2	0.967	STRING database
CYP1A1	COMT	0.967	STRING database
AKR1C3	HSD3B1	0.967	STRING database
GRIN2B	NRG1	0.967	STRING database
MT-CO1	COX6B1	0.967	STRING database
ESR2	MED1	0.967	STRING database
SRD5A2	AKR1C3	0.967	STRING database
ORM2	TTR	0.966	STRING database
AGTR1	GNAQ	0.966	STRING database
PPARA	LPL	0.966	STRING database
ESR1	HSP90AB1	0.966	STRING database
TUBB4A	TUBA4A	0.966	STRING database
NFATC1	PIM1	0.966	STRING database
PPARA	MED1	0.966	STRING database
ATP5C1	UQCRFS1	0.966	STRING database
AKR1C3	CYP17A1	0.966	STRING database
CACNA2D3	CACNB3	0.966	STRING database
ACTN2	TNNI3	0.966	STRING database
NCOA1	MED1	0.966	STRING database
GABRB1	GABRA4	0.966	STRING database
ATP5A1	UQCRFS1	0.966	STRING database
CACNA2D2	CACNA1C	0.965	STRING database
AKR1C2	SRD5A1	0.965	STRING database
CACNB4	CACNA1F	0.965	STRING database
IL6ST	PTPN11	0.965	STRING database
TNNI3	TCAP	0.965	STRING database
CACNA2D2	CACNA1S	0.965	STRING database
ATP5B	COX5B	0.965	STRING database
STAT3	IL1B	0.965	STRING database
ITGB2	FLNA	0.965	STRING database
AKR1C1	SRD5A1	0.965	STRING database
CNR2	OPRD1	0.965	STRING database
SERPINA1	ORM2	0.965	STRING database
CYP19A1	SRD5A1	0.965	STRING database
EGFR	MAPK1	0.965	STRING database
CACNA2D3	CACNB2	0.965	STRING database
COX6C	COX8A	0.965	STRING database
ESR1	PGR	0.964	STRING database
SRD5A1	AKR1D1	0.964	STRING database
AGTR1	EGFR	0.964	STRING database
RAF1	MAPK1	0.964	STRING database
TTN	TPM1	0.964	STRING database
EGFR	TP53	0.964	STRING database
SUMO1	AR	0.964	STRING database
ACTN2	MYBPC3	0.964	STRING database
CACNB4	CACNA1D	0.964	STRING database
CACNA2D2	CACNA1D	0.964	STRING database
CACNA1F	CACNG1	0.964	STRING database
ATP5A1	UQCRC1	0.964	STRING database
SMAD1	BMPR2	0.964	STRING database
HDAC2	NR3C1	0.964	STRING database
CSRP3	TCAP	0.964	STRING database
G6PD	GSR	0.964	STRING database
FOXO1	STAT3	0.963	STRING database
TTN	MYBPC3	0.963	STRING database
PIK3R1	ESR1	0.963	STRING database
CACNA2D2	CACNA1F	0.963	STRING database
AR	MED1	0.963	STRING database
NCOA2	MED1	0.963	STRING database
ATP5C1	UQCRC1	0.963	STRING database
GABRA2	GABRB2	0.963	STRING database
ESR1	NR0B1	0.963	STRING database
UQCRB	COX6B1	0.963	STRING database
PPP2CA	MAPK1	0.963	STRING database
GABRA2	GABRB1	0.963	STRING database
CNR2	OPRL1	0.963	STRING database
ITGB2	SELP	0.963	STRING database
HSD3B1	HSD11B1	0.963	STRING database
SRD5A2	HSD3B1	0.963	STRING database
NCOA1	NR1I2	0.962	STRING database
IL6ST	CTF1	0.962	STRING database
GABRB1	GABRA6	0.962	STRING database
AGTR1	APLN	0.962	STRING database
CACNA2D3	CACNA1D	0.962	STRING database
TNNI3	ACTC1	0.962	STRING database
ESR1	CYP19A1	0.962	STRING database
SDHB	CYC1	0.962	STRING database
COX7C	CYC1	0.961	STRING database
CYC1	COX6B1	0.961	STRING database
MYH6	DMD	0.961	STRING database
PRKCD	MAPK1	0.961	STRING database
LMNA	MAPK1	0.961	STRING database
ATP5C1	COX5B	0.961	STRING database
MYL3	ACTC1	0.961	STRING database
GABRA3	GABRB2	0.961	STRING database
NR3C1	MAPK1	0.961	STRING database
NCOA2	PPARA	0.961	STRING database
GABRB3	GABRA4	0.96	STRING database
HCK	STAT3	0.96	STRING database
GABRA2	GABRB3	0.96	STRING database
UQCRFS1	COX6A2	0.96	STRING database
TTN	TNNC1	0.96	STRING database
PIK3R1	MTOR	0.96	STRING database
GABRA3	GABRB3	0.96	STRING database
HDAC3	TP53	0.96	STRING database
GRIN2B	CAMK2D	0.96	STRING database
NCOA1	PPARGC1A	0.959	STRING database
SRD5A2	AKR1C2	0.959	STRING database
TUBB	YWHAE	0.959	STRING database
ACTN2	CAMK2A	0.959	STRING database
ATP5B	UQCRC1	0.959	STRING database
CACNA1S	CACNB3	0.959	STRING database
HDAC3	PPARG	0.959	STRING database
PPP2CA	RAF1	0.959	STRING database
SRD5A2	CYP19A1	0.959	STRING database
PIK3R1	RET	0.959	STRING database
SMAD1	MAPK1	0.959	STRING database
TPM1	TCAP	0.959	STRING database
PRKCA	EGFR	0.959	STRING database
SDHA	UQCRC1	0.959	STRING database
SRD5A2	AKR1D1	0.959	STRING database
GABRA3	GABRB1	0.959	STRING database
COX7B	COX8A	0.959	STRING database
CACNB1	CACNB2	0.959	STRING database
CACNB2	CACNG1	0.958	STRING database
RXRA	PPARA	0.958	STRING database
NCOA2	NCOA1	0.958	STRING database
ATP5A1	SDHA	0.958	STRING database
TUBA1B	TUBB1	0.958	STRING database
EDN1	UTS2	0.958	STRING database
NFATC1	PPARG	0.957	STRING database
SCNN1B	SCNN1G	0.957	STRING database
EGFR	SLC9A1	0.957	STRING database
PGR	MAPK1	0.957	STRING database
PPP2CA	PLK1	0.956	STRING database
PRKCA	RICTOR	0.956	STRING database
COX5A	NDUFB11	0.956	STRING database
AGT	EDNRA	0.956	STRING database
EDN1	AGTR2	0.956	STRING database
PRKCD	STAT3	0.956	STRING database
SUMO1	NR3C1	0.956	STRING database
POMC	CNR1	0.955	STRING database
RYR2	CAMK2D	0.955	STRING database
RXRA	PPARD	0.955	STRING database
PPARA	APOA1	0.955	STRING database
TPM1	TNNC1	0.955	STRING database
TOP2A	SUMO1	0.955	STRING database
GNAQ	BDKRB1	0.955	STRING database
VDR	RXRA	0.955	STRING database
OPRM1	ADRBK1	0.955	STRING database
TEK	PTPN11	0.955	STRING database
HIF1A	NCOA1	0.955	STRING database
CACNA1F	CACNB3	0.955	STRING database
POMC	ADRB1	0.955	STRING database
FOXP3	IL17A	0.955	STRING database
NOS2	STAT3	0.955	STRING database
COX6A2	UQCRC1	0.955	STRING database
PIK3R1	AR	0.955	STRING database
ATP5C1	COX5A	0.954	STRING database
CACNA1C	CACNG1	0.954	STRING database
CYC1	SLC25A4	0.954	STRING database
GABRA1	GABRA6	0.954	STRING database
TUBB4B	YWHAE	0.954	STRING database
NR0B1	ESR2	0.954	STRING database
SDHC	ATP5C1	0.954	STRING database
TP53	YWHAE	0.954	STRING database
CD36	PPARG	0.954	STRING database
PGR	ERBB2	0.954	STRING database
SCNN1A	SCNN1B	0.954	STRING database
PIK3R1	GNAQ	0.954	STRING database
PPP2CA	PPP1CA	0.954	STRING database
PRKCD	PIK3CA	0.954	STRING database
DMD	TCAP	0.954	STRING database
NCOA1	PGR	0.954	STRING database
PPP2CA	TP53	0.954	STRING database
TUBA3C	TUBB	0.954	STRING database
CYP1B1	HSD17B1	0.954	STRING database
ATP5A1	CYC1	0.953	STRING database
CACNA2D2	CACNA1B	0.953	STRING database
GRIN2B	ACTN2	0.953	STRING database
EDNRB	ADRBK1	0.953	STRING database
PTK6	EGFR	0.953	STRING database
CACNA2D3	CACNA1C	0.953	STRING database
PRKCD	CASP3	0.953	STRING database
COX5A	ATP5B	0.953	STRING database
GRIN2A	CAMK2D	0.953	STRING database
PTK6	ERBB2	0.952	STRING database
TUBA1A	TUBB4A	0.952	STRING database
AKR1C1	HSD3B1	0.952	STRING database
EDNRB	GNAQ	0.952	STRING database
APCS	APOA1	0.952	STRING database
LMNA	VCL	0.952	STRING database
SRD5A2	AKR1C1	0.952	STRING database
HSD17B1	CYP1A1	0.952	STRING database
PIM1	STAT3	0.952	STRING database
CACNB2	CACNB3	0.952	STRING database
CYP19A1	AKR1C3	0.952	STRING database
APLN	AGT	0.952	STRING database
CEL	LPL	0.951	STRING database
GABRQ	GABRA3	0.951	STRING database
TUBA1A	YWHAE	0.951	STRING database
COX7B	MT-CO2	0.951	STRING database
PPARA	MAPK1	0.951	STRING database
UQCRC2	SDHA	0.951	STRING database
COX7B	UQCRFS1	0.951	STRING database
COX6C	MT-CO1	0.951	STRING database
HDAC3	STAT3	0.951	STRING database
COX7B	UQCRQ	0.951	STRING database
CD36	PPARA	0.951	STRING database
CAMK2A	GRIN2C	0.951	STRING database
PLAU	EGFR	0.951	STRING database
PPP2CA	MTOR	0.951	STRING database
YAP1	PPP1CA	0.951	STRING database
SPRY1	EGFR	0.951	STRING database
HSD11B1	AKR1D1	0.95	STRING database
SLC9A1	MAPK1	0.95	STRING database
ACTN2	GRIN1	0.95	STRING database
HSD3B2	AKR1C1	0.95	STRING database
MAPK1	VCL	0.95	STRING database
UQCRQ	ATP5C1	0.95	STRING database
TUBA1C	TUBA4A	0.95	STRING database
EDN1	UTS2R	0.95	STRING database
TTN	DES	0.95	STRING database
TUBA3C	TUBB3	0.95	STRING database
GRIN2B	GRIN3A	0.95	STRING database
PTPN11	PIK3CA	0.949	STRING database
MT-CO2	CYC1	0.949	STRING database
GRIN2A	GRIN3A	0.949	STRING database
TOP2A	PLK1	0.949	STRING database
MED1	PPARGC1A	0.949	STRING database
AR	HDAC3	0.949	STRING database
CACNA2D3	CACNA1F	0.949	STRING database
EDN1	EGFR	0.949	STRING database
DAG1	LAMA4	0.949	STRING database
TUBA1B	TUBB4A	0.949	STRING database
UQCR10	NDUFB11	0.949	STRING database
SDHB	ATP5C1	0.949	STRING database
CYP17A1	CYP11B2	0.949	STRING database
PLK1	TUBA4A	0.949	STRING database
CYP19A1	CYP17A1	0.949	STRING database
SCNN1A	SCNN1G	0.949	STRING database
MT-CYB	COX5B	0.949	STRING database
AGTR1	PTGFR	0.949	STRING database
CACNA2D3	CACNA1S	0.948	STRING database
LPL	PPARGC1A	0.948	STRING database
TUBA1A	PLK1	0.948	STRING database
HCK	PTPN11	0.948	STRING database
PRLR	PTPN11	0.948	STRING database
ESR1	TP53	0.948	STRING database
RXRA	HDAC3	0.948	STRING database
SUMO1	NR3C2	0.947	STRING database
PLK1	PPP2CB	0.947	STRING database
ESR1	ERBB2	0.947	STRING database
GABRA1	GABRA4	0.947	STRING database
PRKCA	MTOR	0.947	STRING database
TOP2B	SUMO1	0.947	STRING database
TUBA1C	TUBB1	0.947	STRING database
SCNN1D	SCNN1B	0.947	STRING database
CYP2B6	SULT2A1	0.947	STRING database
PRKCA	RAF1	0.947	STRING database
NCOA1	SUMO1	0.947	STRING database
CASP3	YWHAE	0.947	STRING database
ACTN2	TNNC1	0.946	STRING database
EDNRA	PTGER1	0.946	STRING database
MAPK1	FGF4	0.946	STRING database
NCOA2	SUMO1	0.946	STRING database
ADH1C	ALDH2	0.946	STRING database
PPP2CA	PPP1CC	0.946	STRING database
MTOR	PPARGC1A	0.946	STRING database
DMD	TPM1	0.946	STRING database
COX4I1	MT-CYB	0.946	STRING database
DES	TCAP	0.946	STRING database
ACTN2	DES	0.946	STRING database
HSP90AB1	PGR	0.946	STRING database
NDUFB11	COX5B	0.946	STRING database
HSD11B1	CYP11B2	0.946	STRING database
HAND2	HAND1	0.946	STRING database
ERBB2	TP53	0.945	STRING database
PRKCB	EGFR	0.945	STRING database
OPRM1	OPRD1	0.945	STRING database
HSD11B1	PPARG	0.945	STRING database
ADCY5	ADCY2	0.945	STRING database
PRKCA	GNAQ	0.945	STRING database
SCNN1D	SCNN1G	0.945	STRING database
MYBPC3	TNNC1	0.945	STRING database
HIF1A	EDN1	0.945	STRING database
AR	NR3C2	0.945	STRING database
ADCY5	ADRB1	0.945	STRING database
AR	PIK3CA	0.945	STRING database
CACNA2D3	CACNA1B	0.945	STRING database
POMC	GNAS	0.945	STRING database
CYC1	COX6A2	0.945	STRING database
AKR1C3	SRD5A3	0.945	STRING database
AR	NR3C1	0.944	STRING database
PIK3R1	TEK	0.944	STRING database
PTPN11	FGF2	0.944	STRING database
CASP3	TP53	0.944	STRING database
MTOR	PIK3CA	0.944	STRING database
GNAS	PTGIR	0.944	STRING database
AGT	BDKRB1	0.944	STRING database
MYBPC3	DES	0.944	STRING database
HSD3B2	HSD11B1	0.944	STRING database
SDHB	COX5B	0.944	STRING database
ESR1	EGFR	0.943	STRING database
COX7B	MT-CO3	0.943	STRING database
GNAS	GNAQ	0.943	STRING database
NR3C2	NR3C1	0.943	STRING database
CACNB3	CACNG1	0.943	STRING database
STAT3	PIK3CA	0.943	STRING database
TUBA1A	TUBB1	0.943	STRING database
EDNRB	AGT	0.943	STRING database
GRIN1	CAMK2D	0.943	STRING database
HDAC2	SUMO1	0.943	STRING database
PRKCD	RAF1	0.942	STRING database
EDNRA	GNAQ	0.942	STRING database
GABRG3	GABRB3	0.942	STRING database
UQCRB	COX7B	0.942	STRING database
AOC3	ALDH2	0.942	STRING database
CYP17A1	SRD5A3	0.942	STRING database
ORM1	SERPINE1	0.942	STRING database
AGT	MAPK1	0.942	STRING database
PRKCA	PPP3CA	0.942	STRING database
MYL3	TNNC1	0.942	STRING database
MYL3	DMD	0.942	STRING database
SLN	PLN	0.942	STRING database
PRLR	STAT3	0.942	STRING database
HSP90AB1	MAPK1	0.942	STRING database
COX7B	UQCRC1	0.941	STRING database
COX6C	COX7A1	0.941	STRING database
EDN1	ADRBK1	0.941	STRING database
GABRQ	GABRG2	0.941	STRING database
ACTA1	CASP3	0.941	STRING database
SCNN1D	SCNN1A	0.941	STRING database
ESR1	ESR2	0.941	STRING database
CYP19A1	CYP11B2	0.941	STRING database
G6PD	TP53	0.941	STRING database
RXRA	MAPK1	0.941	STRING database
CYP19A1	CYP1A1	0.941	STRING database
HSP90AB1	ATP5B	0.941	STRING database
UQCRB	ATP5C1	0.941	STRING database
ESR1	ESRRA	0.941	STRING database
UQCRB	COX6A2	0.941	STRING database
UQCRH	COX5B	0.941	STRING database
TUBA8	TUBB4A	0.941	STRING database
PRKCA	MAPK1	0.941	STRING database
PPP2CA	YWHAE	0.94	STRING database
GABRQ	GABRA2	0.94	STRING database
GABRQ	GABRA5	0.94	STRING database
GABRG3	GABRB2	0.94	STRING database
DES	TNNI3	0.94	STRING database
SCNN1B	RAF1	0.94	STRING database
GABRQ	GABRA4	0.94	STRING database
PRKCA	ADRBK1	0.94	STRING database
PTK6	HIF1A	0.94	STRING database
HSD3B2	SRD5A3	0.94	STRING database
SERPINA1	SERPINC1	0.94	STRING database
AGT	PTGER3	0.94	STRING database
DMD	TNNI3	0.94	STRING database
PTGFR	PTGER1	0.94	STRING database
CYP1A1	HSD3B1	0.94	STRING database
CACNB4	CACNB3	0.94	STRING database
GABRG3	GABRB1	0.94	STRING database
SDHB	COX5A	0.94	STRING database
DES	TPM1	0.94	STRING database
TUBA4A	TUBB1	0.94	STRING database
HSP90AB1	NR3C2	0.94	STRING database
CD36	PPARGC1A	0.939	STRING database
COX7A1	COX6A2	0.939	STRING database
SDHC	COX5B	0.939	STRING database
CD40LG	TNFSF12	0.939	STRING database
MT-CO2	UQCRC1	0.939	STRING database
DES	TNNT2	0.939	STRING database
CYP17A1	SULT2B1	0.939	STRING database
DMD	TNNT2	0.939	STRING database
TAB2	TICAM1	0.939	STRING database
GABRQ	GABRA1	0.939	STRING database
GABRA1	GABRA5	0.939	STRING database
HDAC3	E2F3	0.939	STRING database
APLNR	AGT	0.939	STRING database
HCK	IL6ST	0.939	STRING database
EDNRA	EGFR	0.939	STRING database
AKR1C1	CYP1A1	0.939	STRING database
ACTN2	CAMK2D	0.939	STRING database
HBB	APOA1	0.938	STRING database
OPRM1	CNR1	0.938	STRING database
KCNJ4	KCNJ2	0.938	STRING database
COMT	ALDH2	0.938	STRING database
OPRK1	OPRD1	0.938	STRING database
CYTH2	GNAQ	0.938	STRING database
COX7B	CYC1	0.938	STRING database
LPL	NR3C1	0.938	STRING database
HSD3B2	CYP1A1	0.938	STRING database
GABRG3	GABRQ	0.938	STRING database
AKR1C1	CYP17A1	0.938	STRING database
GRIN2B	GRIN2A	0.937	STRING database
GNAS	ADRB1	0.937	STRING database
NR1H4	NCOA2	0.937	STRING database
STAT3	RORA	0.937	STRING database
TUBA8	TUBB1	0.937	STRING database
YWHAE	MAPK1	0.937	STRING database
ANXA1	NR3C1	0.937	STRING database
FKBP1A	BMPR2	0.937	STRING database
CASP3	TNFSF12	0.937	STRING database
EDNRA	ADRBK1	0.937	STRING database
COX7A1	COX6B1	0.937	STRING database
GABRA3	GABRA5	0.937	STRING database
PRKCD	ADRBK1	0.937	STRING database
FGF1	MAPK1	0.937	STRING database
CNR1	OPRK1	0.937	STRING database
PPARA	CYP1A1	0.937	STRING database
PRKCA	PRKCB	0.937	STRING database
PLA2G1B	MAPK1	0.937	STRING database
GABRQ	GABRA6	0.936	STRING database
ADCY5	OPRL1	0.936	STRING database
UQCRQ	SDHC	0.936	STRING database
GRIN2A	GRIN2C	0.936	STRING database
TUBB4B	TUBA8	0.936	STRING database
PTGS2	CYP2C9	0.936	STRING database
GRK5	CCKAR	0.936	STRING database
COX7C	UQCRC2	0.936	STRING database
MED1	RORA	0.936	STRING database
AKR1C2	SRD5A3	0.936	STRING database
PTGS2	CYP2B6	0.936	STRING database
ERN1	MAP3K5	0.936	STRING database
GRK5	EDNRA	0.936	STRING database
AKR1C1	SRD5A3	0.936	STRING database
ALOX5	CYP2B6	0.935	STRING database
PIK3R1	ACTA1	0.935	STRING database
MYH6	DES	0.935	STRING database
CYP1B1	CYP1A1	0.935	STRING database
TUBA1C	TUBA1A	0.935	STRING database
COX7A1	COX5B	0.934	STRING database
UTS2R	PTGER1	0.934	STRING database
ADCY5	OPRD1	0.934	STRING database
ADCY5	OPRK1	0.934	STRING database
COX6C	UQCRH	0.934	STRING database
POMC	AGT	0.934	STRING database
COX7C	UQCRC1	0.934	STRING database
YWHAE	TUBB4A	0.934	STRING database
ITGB2	CD40LG	0.934	STRING database
CDA	CES1	0.934	STRING database
CYP1A1	SULT2A1	0.934	STRING database
AGTR1	POMC	0.934	STRING database
GRIN3A	GRIN2C	0.934	STRING database
CYP1B1	AKR1C3	0.933	STRING database
MT-ATP8	ATP5C1	0.933	STRING database
PPARA	AGT	0.933	STRING database
ADCY5	CNR1	0.933	STRING database
HSD3B2	HSD3B1	0.933	STRING database
PPARD	MED1	0.933	STRING database
ADCY5	OPRM1	0.933	STRING database
HIF1A	NR3C1	0.933	STRING database
CAMK2A	GRIN2D	0.933	STRING database
TUBA3C	TUBB4B	0.933	STRING database
CYP17A1	AKR1D1	0.933	STRING database
TAZ	CYC1	0.933	STRING database
EDN1	SLC9A1	0.933	STRING database
SDHC	COX6A2	0.932	STRING database
ILK	LEF1	0.932	STRING database
PTPN11	FGF4	0.932	STRING database
NCOA2	PPARGC1A	0.932	STRING database
GABRA1	GABRA3	0.932	STRING database
TUBB	PLK1	0.932	STRING database
PTGS1	CYP2C9	0.932	STRING database
FOXO1	MAPK1	0.932	STRING database
ESR1	TUBA1A	0.932	STRING database
PPP2CA	EGFR	0.931	STRING database
RARG	MED1	0.931	STRING database
GRIN3A	GRIN2D	0.931	STRING database
HSD17B1	AKR1C3	0.931	STRING database
EGFR	FGF2	0.931	STRING database
SDHC	UQCRFS1	0.931	STRING database
RAF1	PPP2CB	0.931	STRING database
EDN1	PTGER1	0.93	STRING database
GABRA6	GABRA4	0.93	STRING database
OPRM1	PTGER3	0.93	STRING database
NRG1	MAPK1	0.93	STRING database
TCAP	TNNC1	0.93	STRING database
MYBPC3	DMD	0.93	STRING database
EDN1	GNAQ	0.93	STRING database
CYP1A1	HSD11B1	0.93	STRING database
SRD5A3	AKR1D1	0.93	STRING database
CACNB1	CACNB3	0.93	STRING database
CYP2C8	PTGS2	0.93	STRING database
MT-CYB	COX5A	0.929	STRING database
NRG1	PIK3CA	0.929	STRING database
PTGER3	P2RY12	0.929	STRING database
GABRA5	GABRA6	0.929	STRING database
OPRM1	CNR2	0.929	STRING database
NCOA1	PAX3	0.929	STRING database
HSD3B1	AKR1D1	0.929	STRING database
ATP5A1	MT-ATP8	0.929	STRING database
ESR1	CDK9	0.929	STRING database
NCOA2	RARG	0.928	STRING database
ADRB1	ADCY2	0.928	STRING database
AKR1C3	CYP1A1	0.928	STRING database
NFATC1	NKX2-5	0.928	STRING database
AKR1C3	CYP11B2	0.928	STRING database
EDN1	BDKRB1	0.928	STRING database
CYP1A1	CYP2B6	0.928	STRING database
AGTR1	EDNRA	0.928	STRING database
PPARA	EDN1	0.928	STRING database
CD36	APOA1	0.928	STRING database
AGTR1	ACE	0.928	STRING database
PTGER3	OPRD1	0.928	STRING database
POMC	ANXA1	0.928	STRING database
MT-CO1	COX8A	0.928	STRING database
CYP1B1	SULT2A1	0.928	STRING database
PPARA	SULT2A1	0.927	STRING database
ESR1	SUMO1	0.927	STRING database
PPARA	ESRRA	0.927	STRING database
ADCY5	PTGIR	0.927	STRING database
CNR2	OPRK1	0.927	STRING database
YWHAE	TUBA4A	0.927	STRING database
PRKCB	MAPK1	0.927	STRING database
TTN	LDB3	0.927	STRING database
NRG1	PTPN11	0.927	STRING database
HCK	PIK3R1	0.927	STRING database
PTGER4	PTGER2	0.927	STRING database
GABRA5	GABRA4	0.927	STRING database
TUBB4B	PLK1	0.927	STRING database
GNAS	PTGER4	0.927	STRING database
ATP5C1	COX6A2	0.927	STRING database
VDR	CYP27B1	0.927	STRING database
TUBB	MAPK1	0.927	STRING database
ACTN2	DMD	0.926	STRING database
ESR1	GNAS	0.926	STRING database
AOC1	ALDH2	0.926	STRING database
FOXO1	PPARGC1A	0.926	STRING database
AGTR2	ACE	0.926	STRING database
MYL3	DES	0.926	STRING database
ALOX5	CYP2C9	0.926	STRING database
HSD3B1	SRD5A3	0.926	STRING database
APLN	POMC	0.926	STRING database
LAMP2	PSEN1	0.926	STRING database
POMC	CNR2	0.926	STRING database
CYP1A1	CYP2C9	0.926	STRING database
POMC	AGTR2	0.926	STRING database
RYR2	PPP1CC	0.926	STRING database
MT-CO2	PTGS1	0.926	STRING database
ADCY5	PTGER3	0.926	STRING database
DMD	LAMA4	0.926	STRING database
SRD5A2	CYP11B2	0.926	STRING database
PIK3R1	PRKCD	0.926	STRING database
EDN1	PTGFR	0.926	STRING database
CYP19A1	SRD5A3	0.926	STRING database
FGF2	PIK3CA	0.926	STRING database
VKORC1	CYP2C9	0.925	STRING database
FGF1	PTPN11	0.925	STRING database
PIK3CG	PIK3CA	0.925	STRING database
NFATC1	EDN1	0.925	STRING database
PTGS1	CYP2B6	0.925	STRING database
PGR	MED1	0.925	STRING database
ADRBK1	PTGER1	0.925	STRING database
ESR1	NR3C1	0.925	STRING database
POMC	PTGER3	0.925	STRING database
HDAC2	PPARG	0.925	STRING database
SERPINA1	HSP90B1	0.925	STRING database
HIF1A	RORA	0.924	STRING database
NFATC1	FKBP1A	0.924	STRING database
HSD17B1	HSD3B1	0.924	STRING database
UQCRB	SDHA	0.924	STRING database
CNR1	P2RY12	0.924	STRING database
SUMO1	PPARG	0.924	STRING database
DES	TNNC1	0.924	STRING database
TRPC6	GNAQ	0.924	STRING database
CYTH2	EGFR	0.924	STRING database
HSD3B2	SULT2B1	0.924	STRING database
CYP1A1	CYP2C8	0.924	STRING database
TTR	GLA	0.924	STRING database
CYP11B2	SRD5A1	0.924	STRING database
SUMO1	PGR	0.924	STRING database
SDHD	UQCRFS1	0.924	STRING database
EGFR	PPP2CB	0.924	STRING database
HDAC3	MED1	0.924	STRING database
AGTR2	ADRBK1	0.924	STRING database
PPP2CB	MAPK1	0.924	STRING database
YAP1	EGFR	0.924	STRING database
COX4I1	COX7A1	0.924	STRING database
NCOA1	CYP1A1	0.923	STRING database
RXRA	FABP6	0.923	STRING database
CASP3	ANXA5	0.923	STRING database
NFATC1	HAND2	0.923	STRING database
POMC	ADCY2	0.923	STRING database
GRK5	EDN1	0.923	STRING database
ACTN2	GRIN2A	0.923	STRING database
COX7B	MT-CO1	0.923	STRING database
RXRA	LPL	0.923	STRING database
HSD3B1	SULT2B1	0.923	STRING database
COX4I1	SDHB	0.923	STRING database
CNR1	PTGER3	0.923	STRING database
GRK5	EDNRB	0.923	STRING database
HSD3B2	AKR1D1	0.923	STRING database
RXRA	NR3C1	0.923	STRING database
AGTR2	CNR1	0.923	STRING database
PPP2CA	PPP3CA	0.922	STRING database
COX7C	COX7A1	0.922	STRING database
RXRA	SUMO1	0.922	STRING database
ACACB	DLAT	0.922	STRING database
PPP2CA	SHOC2	0.922	STRING database
PIK3R1	ESR2	0.922	STRING database
PIK3R1	NR3C1	0.922	STRING database
PLK1	TP53	0.922	STRING database
APLN	OPRK1	0.922	STRING database
GRK5	GNAQ	0.922	STRING database
PIK3CA	FGF4	0.922	STRING database
POMC	PTGER4	0.922	STRING database
GNAS	EDNRA	0.922	STRING database
PPARA	HDAC3	0.922	STRING database
PPP1CA	PPP2CB	0.922	STRING database
POMC	PTGER2	0.922	STRING database
MTOR	YWHAE	0.922	STRING database
EDNRB	PTGER1	0.922	STRING database
RXRA	CYP1A1	0.922	STRING database
PPARA	NOS2	0.922	STRING database
RXRA	SULT2A1	0.921	STRING database
DAG1	ACTA1	0.921	STRING database
SHBG	SULT2A1	0.921	STRING database
PLK1	TUBB4A	0.921	STRING database
PRKCA	GNAS	0.921	STRING database
AGT	ADRBK1	0.921	STRING database
BMPR2	NKX2-5	0.921	STRING database
APLN	AGTR2	0.921	STRING database
GRK5	UTS2R	0.921	STRING database
PPARGC1A	RORA	0.921	STRING database
NCOA1	HDAC3	0.921	STRING database
MT-CO1	COX6A2	0.921	STRING database
HSP90AB1	ESR2	0.921	STRING database
HDAC2	HDAC3	0.921	STRING database
APLN	OPRL1	0.921	STRING database
PPP1CC	PPP2CB	0.921	STRING database
PPP3CA	PPP2CB	0.921	STRING database
DES	DMD	0.921	STRING database
TEK	PIK3CA	0.921	STRING database
CYP1B1	CYP2B6	0.921	STRING database
FGF1	PIK3R1	0.921	STRING database
CYP1A1	CYP17A1	0.921	STRING database
MT-ATP8	MT-CYB	0.92	STRING database
HDAC3	PPARGC1A	0.92	STRING database
CYP19A1	AKR1D1	0.92	STRING database
AGTR1	EDNRB	0.92	STRING database
ACTA1	PTPN11	0.92	STRING database
PIK3R1	CD40LG	0.92	STRING database
ADCY2	OPRD1	0.92	STRING database
ADCY5	PTGER2	0.92	STRING database
CYP11B2	SRD5A3	0.92	STRING database
TBX20	NKX2-5	0.92	STRING database
NCOA2	CYP1A1	0.92	STRING database
EDN1	RAF1	0.92	STRING database
OPRM1	APLN	0.92	STRING database
HCK	PIK3CA	0.92	STRING database
TUBB	TUBB4A	0.92	STRING database
CD40LG	PIK3CG	0.92	STRING database
RXRA	APOA1	0.92	STRING database
YAP1	AR	0.92	STRING database
LPL	MED1	0.919	STRING database
COX5A	COX7A1	0.919	STRING database
PIK3CA	NR3C1	0.919	STRING database
COX6C	UQCRFS1	0.919	STRING database
PTGER3	OPRK1	0.919	STRING database
PIK3R1	FGF2	0.919	STRING database
HCK	PRKCD	0.919	STRING database
ESR1	GNAQ	0.919	STRING database
UQCRQ	MT-CO1	0.919	STRING database
PNPLA2	APOA1	0.919	STRING database
ITGB2	STAT3	0.919	STRING database
ADCY2	OPRK1	0.919	STRING database
CCKAR	GNAQ	0.919	STRING database
PTGER3	OPRL1	0.919	STRING database
LPL	HDAC3	0.919	STRING database
CNR1	ADCY2	0.919	STRING database
ACTA1	TPM1	0.919	STRING database
CYP11B2	AKR1D1	0.919	STRING database
SERPINA1	SERPINE1	0.919	STRING database
AR	PGR	0.919	STRING database
AGT	PTGER1	0.919	STRING database
DMD	TNNC1	0.918	STRING database
GRK5	ADRBK1	0.918	STRING database
OPRM1	STAT3	0.918	STRING database
ESRRA	MED1	0.918	STRING database
UQCRQ	MT-CO2	0.918	STRING database
NCOA1	ESRRG	0.918	STRING database
ADCY5	POMC	0.918	STRING database
PPP3CA	SHOC2	0.918	STRING database
ITGB2	PLAU	0.918	STRING database
CHD1	ESR1	0.918	STRING database
ERBB2	STAT3	0.918	STRING database
AKR1C3	SULT2B1	0.918	STRING database
CYP1A1	SULT2B1	0.918	STRING database
CNR2	P2RY12	0.918	STRING database
APLNR	POMC	0.917	STRING database
AGTR2	GNAS	0.917	STRING database
PPARGC1A	APOA1	0.917	STRING database
RAF1	VCL	0.917	STRING database
CYP2C8	PTGS1	0.917	STRING database
ALOX5	CYP2C8	0.917	STRING database
NCOA1	LPL	0.917	STRING database
SMAD1	NKX2-5	0.917	STRING database
GNAS	PTGER1	0.917	STRING database
ESRRG	MED1	0.917	STRING database
GABRA2	GABRA1	0.917	STRING database
EDNRB	AGTR2	0.917	STRING database
AGT	UTS2	0.917	STRING database
AGT	GNAQ	0.917	STRING database
FGF1	FGF4	0.917	STRING database
APLN	OPRD1	0.917	STRING database
ADRB1	PTGER2	0.917	STRING database
SMAD1	SMAD9	0.917	STRING database
RXRA	NR1I2	0.917	STRING database
CYC1	NDUFB11	0.917	STRING database
SAV1	CASP3	0.916	STRING database
GABRB3	GABRB2	0.916	STRING database
PPP3CA	PPP1CA	0.916	STRING database
ADRB1	PTGIR	0.916	STRING database
EDN1	CCKAR	0.916	STRING database
SHOC2	PPP2CB	0.916	STRING database
AGTR2	EDNRA	0.916	STRING database
IMPDH1	TUBB4B	0.916	STRING database
ADCY2	OPRL1	0.916	STRING database
APLNR	PTGER3	0.916	STRING database
FGF2	FGF4	0.916	STRING database
RXRA	AGT	0.916	STRING database
HIF1A	MAPK1	0.916	STRING database
DSP	CASP3	0.916	STRING database
HCK	EDN1	0.916	STRING database
PIK3CA	VCL	0.915	STRING database
GRIN1	GRIN3B	0.915	STRING database
PTGFR	GNAQ	0.915	STRING database
ARF1	PIK3CA	0.915	STRING database
SUMO1	PPARGC1A	0.915	STRING database
ESR2	MAPK1	0.915	STRING database
G6PD	GAPDHS	0.915	STRING database
AGTR1	AGTR2	0.915	STRING database
APLN	CNR1	0.915	STRING database
YAP1	SMAD1	0.915	STRING database
GRK5	PTGER1	0.915	STRING database
GABRA2	GABRA6	0.915	STRING database
AGT	MED1	0.915	STRING database
PIK3CA	IL1B	0.915	STRING database
TTR	MAPK1	0.915	STRING database
GABRA2	GABRA4	0.915	STRING database
CNR1	BDKRB1	0.915	STRING database
MT-CO2	NOS2	0.915	STRING database
ADRBK1	CCKAR	0.915	STRING database
PTGS2	TP53	0.915	STRING database
CASP3	DSG2	0.915	STRING database
TUBB4B	MAPK1	0.915	STRING database
HDAC3	RORA	0.915	STRING database
CNOT3	TP53	0.915	STRING database
BMPR2	PPP1CA	0.914	STRING database
APLNR	ADCY5	0.914	STRING database
EDNRB	PTGFR	0.914	STRING database
PTGER4	PTGIR	0.914	STRING database
GNAS	PTGER2	0.914	STRING database
PPP2CA	PTPN11	0.914	STRING database
MT-CO3	COX8A	0.914	STRING database
OPRM1	ADCY2	0.914	STRING database
VDR	RARG	0.914	STRING database
ACTA1	PIK3CA	0.914	STRING database
NR3C2	PGR	0.914	STRING database
ADRBK1	BDKRB1	0.914	STRING database
PPP3CA	PPP1CC	0.914	STRING database
PTGER1	GNAQ	0.914	STRING database
UTS2R	GNAQ	0.914	STRING database
IMPDH1	TUBB	0.914	STRING database
PTGFR	EDNRA	0.914	STRING database
PTGER3	ADCY2	0.913	STRING database
GRK5	BDKRB1	0.913	STRING database
GRK5	PTGFR	0.913	STRING database
ESR2	PIK3CA	0.913	STRING database
UTS2R	ADRBK1	0.913	STRING database
APLNR	CNR1	0.913	STRING database
PTGFR	ADRBK1	0.913	STRING database
PGR	PIK3CA	0.913	STRING database
GABRG3	GABRA5	0.913	STRING database
GRIN2B	GRIN2C	0.913	STRING database
ATP5C1	CYC1	0.913	STRING database
OPRL1	P2RY12	0.913	STRING database
EDN1	ANXA1	0.913	STRING database
ADCY5	PTGER4	0.913	STRING database
GABRG3	GABRA1	0.913	STRING database
MT-CO2	COX8A	0.913	STRING database
CYP2B6	CYP2C9	0.912	STRING database
PRKCB	RAF1	0.912	STRING database
UTS2R	EDNRA	0.912	STRING database
ADCY5	EDN1	0.912	STRING database
STAT3	OPRD1	0.912	STRING database
CCKAR	BDKRB1	0.912	STRING database
PGR	NR3C1	0.912	STRING database
UQCRB	MT-CO2	0.912	STRING database
OMA1	YME1L1	0.912	STRING database
ADCY5	AGT	0.912	STRING database
AGTR2	ADCY2	0.912	STRING database
CNR2	AGTR2	0.912	STRING database
TAZ	SLC25A4	0.912	STRING database
PPARA	MT-CO2	0.912	STRING database
GABRG3	GABRA4	0.911	STRING database
IL17A	IL1B	0.911	STRING database
COX7B	COX7A1	0.911	STRING database
BMPR2	TAB2	0.911	STRING database
PLK1	YWHAE	0.911	STRING database
CYP1A1	MED1	0.911	STRING database
GRK5	AGT	0.911	STRING database
P2RY12	OPRK1	0.911	STRING database
APLN	BDKRB1	0.911	STRING database
GABRA2	GABRA3	0.911	STRING database
GABRG3	GABRA2	0.911	STRING database
CACNB4	CACNA1B	0.911	STRING database
IL6ST	FOXO1	0.911	STRING database
ANXA1	PTGER3	0.911	STRING database
GRIN2B	GRIN2D	0.911	STRING database
NCOA1	SULT2A1	0.911	STRING database
ESR1	TUBA1C	0.91	STRING database
NCOA2	LPL	0.91	STRING database
ATP5A1	HSP90AB1	0.91	STRING database
CDA	TK2	0.91	STRING database
CAMK2D	GRIN2C	0.91	STRING database
ADCY5	P2RY12	0.91	STRING database
GNAS	PRKCB	0.91	STRING database
PTGFR	CCKAR	0.91	STRING database
CNR2	PTGER3	0.91	STRING database
PIK3R1	IL1B	0.91	STRING database
PIK3R1	AGT	0.91	STRING database
CAMK2D	GRIN2D	0.91	STRING database
GRIN2A	GRIN2D	0.91	STRING database
ANXA1	P2RY12	0.91	STRING database
P2RY12	OPRD1	0.91	STRING database
PPP2CA	RPL3	0.91	STRING database
GABRA2	GABRA5	0.91	STRING database
ESRRA	ATP5B	0.91	STRING database
PIK3R1	VCL	0.91	STRING database
CD36	ITGAL	0.909	STRING database
GABRG3	GABRA6	0.909	STRING database
ACTN2	GRIN2C	0.909	STRING database
HSP90B1	APOA1	0.909	STRING database
GABRA3	GABRA6	0.909	STRING database
AGT	P2RY12	0.909	STRING database
PPARA	SUMO1	0.909	STRING database
PNPLA2	HSP90B1	0.909	STRING database
COMT	AOC3	0.909	STRING database
APLNR	AGTR2	0.909	STRING database
GABRG3	GABRA3	0.909	STRING database
APLN	CNR2	0.909	STRING database
ADCY5	EDNRA	0.909	STRING database
NCOA1	APOA1	0.909	STRING database
FGF1	PIK3CA	0.909	STRING database
PTK6	NR3C1	0.909	STRING database
RXRA	NOS2	0.909	STRING database
FOXP3	STAT3	0.909	STRING database
TP53	PPP2CB	0.909	STRING database
CD36	ITGB2	0.909	STRING database
ESRRA	NR3C1	0.908	STRING database
ESR2	GNAQ	0.908	STRING database
APLNR	CNR2	0.908	STRING database
RXRA	PRKCA	0.908	STRING database
PTPN11	TICAM1	0.908	STRING database
EDNRB	EDNRA	0.908	STRING database
PIK3R1	NRG1	0.908	STRING database
LMNA	RAF1	0.908	STRING database
GABRQ	GABRB3	0.908	STRING database
RXRA	TOP2B	0.908	STRING database
OPRM1	P2RY12	0.908	STRING database
GABRA3	GABRA4	0.908	STRING database
CACNA1B	CACNB2	0.908	STRING database
AGTR2	BDKRB1	0.908	STRING database
CYP2C8	CYP2B6	0.908	STRING database
NCOA2	SULT2A1	0.908	STRING database
AGT	ADCY2	0.908	STRING database
HBB	ORM1	0.908	STRING database
FOXO1	YWHAE	0.908	STRING database
CNR2	CNR1	0.908	STRING database
APLNR	AGTR1	0.908	STRING database
ACTN2	PIK3CA	0.908	STRING database
GRIN2C	GRIN2D	0.908	STRING database
EDN1	GNAS	0.907	STRING database
CACNA1A	GNAQ	0.907	STRING database
NCOA2	HDAC3	0.907	STRING database
ANXA1	PIK3CA	0.907	STRING database
PTGIR	PTGER2	0.907	STRING database
PRKCA	PRKCD	0.907	STRING database
COX6A2	NDUFB11	0.907	STRING database
COX7C	MT-CYB	0.907	STRING database
CCKAR	PTGER1	0.907	STRING database
TP53	PIK3CA	0.907	STRING database
APLNR	P2RY12	0.907	STRING database
GABRB3	GABRB1	0.907	STRING database
MT-CO3	CYC1	0.907	STRING database
ADRB1	PTGER4	0.907	STRING database
SERPINC1	HSP90B1	0.907	STRING database
TUBB	TTR	0.907	STRING database
ADCY2	PTGER4	0.907	STRING database
AGTR1	PTGER1	0.907	STRING database
APLNR	ADCY2	0.907	STRING database
GABRQ	GABRB1	0.907	STRING database
PIK3R1	AGTR1	0.907	STRING database
RARG	MAPK1	0.907	STRING database
PRKCA	RET	0.907	STRING database
MT-CO3	UQCRC1	0.907	STRING database
ADCY5	AGTR2	0.907	STRING database
SLC18A3	EGFR	0.906	STRING database
ACTA1	LAMA4	0.906	STRING database
PIK3R1	EDN1	0.906	STRING database
ANXA1	AGT	0.906	STRING database
IMPDH1	MAPK1	0.906	STRING database
GNAS	ESR2	0.906	STRING database
EDNRB	BDKRB1	0.906	STRING database
GABRQ	GABRB2	0.906	STRING database
EDNRA	BDKRB1	0.906	STRING database
PIK3R1	ANXA1	0.906	STRING database
TUBA8	TUBA4A	0.906	STRING database
APLNR	OPRK1	0.906	STRING database
NFATC1	HAND1	0.906	STRING database
ADCY2	PTGER2	0.906	STRING database
OPRL1	OPRK1	0.906	STRING database
SDHC	UQCRC2	0.906	STRING database
APLNR	OPRL1	0.906	STRING database
PRKCD	TTR	0.906	STRING database
IMPDH1	GLA	0.906	STRING database
PIK3CA	RAF1	0.906	STRING database
PTGS2	NOS2	0.906	STRING database
CNR1	AGT	0.906	STRING database
AGTR1	BDKRB1	0.905	STRING database
PIK3R1	AGTR2	0.905	STRING database
APLNR	OPRM1	0.905	STRING database
ADCY2	PTGIR	0.905	STRING database
EDNRA	SLC9A1	0.905	STRING database
OPRM1	OPRK1	0.905	STRING database
OPRL1	OPRD1	0.905	STRING database
GRK5	UTS2	0.905	STRING database
EDN1	ADCY2	0.905	STRING database
ITGB2	PLAT	0.905	STRING database
APLNR	BDKRB1	0.905	STRING database
PRKCA	YWHAE	0.905	STRING database
ADCY2	EDNRA	0.905	STRING database
MED1	SULT2A1	0.905	STRING database
APLNR	OPRD1	0.905	STRING database
ERN1	PSEN1	0.905	STRING database
NFATC1	ACTA1	0.905	STRING database
NCOA1	NR1I3	0.905	STRING database
AGTR1	OPRM1	0.905	STRING database
OPRM1	OPRL1	0.905	STRING database
CACNA1D	CACNA1C	0.905	STRING database
PRKCD	IMPDH1	0.905	STRING database
PLAU	ITGAL	0.905	STRING database
AGTR1	OPRL1	0.905	STRING database
CD36	MED1	0.905	STRING database
AGTR1	OPRK1	0.905	STRING database
ORM2	GLA	0.905	STRING database
AGTR1	OPRD1	0.905	STRING database
PIK3R1	EDNRB	0.905	STRING database
AGTR2	OPRL1	0.905	STRING database
RXRA	HSD11B1	0.905	STRING database
AKR1C1	CYP11B2	0.905	STRING database
EDN1	PIK3CA	0.905	STRING database
AGT	UTS2R	0.905	STRING database
RXRA	CD36	0.905	STRING database
OPRM1	AGTR2	0.904	STRING database
ADCY5	CNR2	0.904	STRING database
CNR2	ADCY2	0.904	STRING database
ANXA1	EDNRA	0.904	STRING database
PIK3R1	BDKRB1	0.904	STRING database
ADCY5	BDKRB1	0.904	STRING database
ARF1	PIK3R1	0.904	STRING database
CACNA1F	CACNA1S	0.904	STRING database
ACTN2	SERPINA1	0.904	STRING database
COX6B1	UQCRC1	0.904	STRING database
GNAQ	UTS2	0.904	STRING database
AGTR2	CCKAR	0.904	STRING database
AGTR1	ANXA1	0.904	STRING database
ADCY2	BDKRB1	0.904	STRING database
ORM2	SERPINE1	0.904	STRING database
GLB1	MAPK1	0.904	STRING database
EDNRB	PIK3CA	0.904	STRING database
PRKCD	GLA	0.904	STRING database
APLN	PTGER3	0.904	STRING database
SERPINC1	PNPLA2	0.904	STRING database
SERPINA1	PNPLA2	0.904	STRING database
AGTR2	PIK3CA	0.903	STRING database
SCNN1G	RAF1	0.903	STRING database
TAZ	ATP5A1	0.903	STRING database
PTPN11	PPP2CB	0.903	STRING database
EDNRA	PIK3CA	0.903	STRING database
AGTR2	OPRK1	0.903	STRING database
PIK3R1	UTS2	0.903	STRING database
CDA	ORM1	0.903	STRING database
CACNA1S	CACNA1D	0.903	STRING database
CD36	PLAU	0.903	STRING database
TUBA8	TUBA1A	0.903	STRING database
AGTR2	OPRD1	0.903	STRING database
AGTR1	CCKAR	0.903	STRING database
TEK	FGF2	0.903	STRING database
YAP1	HDAC3	0.903	STRING database
AGTR2	UTS2R	0.903	STRING database
CACNA1F	CACNA1C	0.903	STRING database
ESR1	TUBA4A	0.903	STRING database
CD40LG	PIK3CA	0.903	STRING database
UQCRQ	COX7A1	0.903	STRING database
ANXA1	PTGFR	0.903	STRING database
NCOA2	CD36	0.903	STRING database
GNAS	AGT	0.903	STRING database
PTGFR	AGT	0.903	STRING database
POMC	P2RY12	0.903	STRING database
ACTN2	GRIN2D	0.903	STRING database
VDR	TOP2B	0.902	STRING database
CACNA1S	CACNA1C	0.902	STRING database
SMAD1	PPP1CA	0.902	STRING database
AGTR1	UTS2R	0.902	STRING database
GLA	MAPK1	0.902	STRING database
AGTR1	PIK3CA	0.902	STRING database
NCOA1	FABP6	0.902	STRING database
PPARD	DLAT	0.902	STRING database
NCOA2	AGT	0.902	STRING database
TUBA1B	TUBA8	0.902	STRING database
ACTN2	SERPINE1	0.902	STRING database
PIK3R1	FGF4	0.902	STRING database
EDNRB	CCKAR	0.902	STRING database
ANXA1	CNR1	0.902	STRING database
TUBB4B	TUBB4A	0.902	STRING database
CACNA1F	CACNA1D	0.902	STRING database
ANXA1	BDKRB1	0.902	STRING database
SCNN1A	RAF1	0.902	STRING database
TUBA8	TUBA1C	0.902	STRING database
AGTR2	PTGER3	0.902	STRING database
ADCY2	P2RY12	0.902	STRING database
SCNN1D	RAF1	0.902	STRING database
EDNRB	UTS2R	0.902	STRING database
AGTR1	UTS2	0.902	STRING database
CDA	HBB	0.902	STRING database
ORM2	TUBB	0.902	STRING database
ADCY5	APLN	0.902	STRING database
AOC1	VCL	0.902	STRING database
PTGFR	BDKRB1	0.902	STRING database
AR	TP53	0.902	STRING database
CCKAR	PIK3CA	0.902	STRING database
POMC	PTGIR	0.901	STRING database
EDNRA	UTS2	0.901	STRING database
OPRD1	BDKRB1	0.901	STRING database
EDNRA	CCKAR	0.901	STRING database
APLN	P2RY12	0.901	STRING database
MED1	APOA1	0.901	STRING database
PIK3R1	PTGFR	0.901	STRING database
NCOA2	APOA1	0.901	STRING database
PIK3R1	PTGER1	0.901	STRING database
PTK6	NRG1	0.901	STRING database
PIK3R1	CCKAR	0.901	STRING database
OPRM1	BDKRB1	0.901	STRING database
AGT	OPRL1	0.901	STRING database
PIK3R1	UTS2R	0.901	STRING database
MTOR	PPARG	0.901	STRING database
NCOA1	AGT	0.901	STRING database
EDNRB	UTS2	0.901	STRING database
ANXA1	ADCY2	0.901	STRING database
ACTN2	ORM1	0.901	STRING database
AGTR2	PTGER1	0.901	STRING database
OPRL1	BDKRB1	0.901	STRING database
TUBB4B	TUBB1	0.901	STRING database
ORM2	TUBB4B	0.901	STRING database
AGT	OPRD1	0.901	STRING database
HCK	AGT	0.901	STRING database
ATP5A1	COX5B	0.901	STRING database
AGT	OPRK1	0.901	STRING database
ACTN2	ORM2	0.901	STRING database
GLB1	TTR	0.901	STRING database
ACTN2	PIK3R1	0.901	STRING database
AGT	CCKAR	0.901	STRING database
PIK3R1	EDNRA	0.901	STRING database
OPRM1	AGT	0.901	STRING database
ANXA1	OPRL1	0.901	STRING database
UTS2R	CCKAR	0.901	STRING database
CD36	NCOA1	0.901	STRING database
CNR2	AGT	0.901	STRING database
TUBB	GLA	0.9	STRING database
CNR2	BDKRB1	0.9	STRING database
PTGER3	BDKRB1	0.9	STRING database
ANXA1	OPRD1	0.9	STRING database
ADRBK1	UTS2	0.9	STRING database
APLN	ADCY2	0.9	STRING database
ANXA1	GNAQ	0.9	STRING database
TUBB4B	TTR	0.9	STRING database
ANXA1	UTS2R	0.9	STRING database
ANXA1	CNR2	0.9	STRING database
RARG	HDAC3	0.9	STRING database
TUBB4B	GLB1	0.9	STRING database
ATP5A1	YME1L1	0.9	STRING database
ANXA1	AGTR2	0.9	STRING database
CACNA1B	CACNA2D1	0.9	STRING database
APLN	ANXA1	0.9	STRING database
AGTR2	UTS2	0.9	STRING database
UTS2R	BDKRB1	0.9	STRING database
DAG1	PRKCA	0.9	STRING database
ANXA1	OPRK1	0.9	STRING database
DAG1	PRKCD	0.9	STRING database
NCOA2	ANKRD1	0.9	STRING database
IMPDH1	TTR	0.9	STRING database
DAG1	PRKCB	0.9	STRING database
ANXA1	ADRBK1	0.9	STRING database
AOC1	ORM2	0.9	STRING database
ORM2	VCL	0.9	STRING database
AGT	PIK3CA	0.9	STRING database
PRKCD	TUBB	0.9	STRING database
PPARA	ANKRD1	0.9	STRING database
AGTR1	SLC18A3	0.9	STRING database
ESR1	TUBA8	0.9	STRING database
PRKCD	TUBB4B	0.9	STRING database
GRK5	ANXA1	0.9	STRING database
RXRA	MT-CO2	0.9	STRING database
RXRA	ANKRD1	0.9	STRING database
PTGFR	UTS2	0.9	STRING database
ORM2	IMPDH1	0.9	STRING database
AGTR2	P2RY12	0.9	STRING database
TUBA1B	TUBA4A	0.9	STRING database
TAZ	ATP5B	0.9	STRING database
PIK3CA	UTS2	0.9	STRING database
NCOA1	ANKRD1	0.9	STRING database
POMC	BDKRB1	0.9	STRING database
OPRM1	ANXA1	0.9	STRING database
OPRK1	BDKRB1	0.9	STRING database
ANXA1	UTS2	0.9	STRING database
PRKCD	GLB1	0.9	STRING database
ANXA1	CCKAR	0.9	STRING database
TUBB4B	GLA	0.9	STRING database
PTGER1	BDKRB1	0.9	STRING database
ADCY5	ANXA1	0.9	STRING database
ANKRD1	MED1	0.9	STRING database
ORM2	MAPK1	0.9	STRING database
CCKAR	UTS2	0.9	STRING database
PTGER1	UTS2	0.9	STRING database
EDNRB	ANXA1	0.9	STRING database
PIK3CA	BDKRB1	0.9	STRING database
TUBB4A	TUBB1	0.9	STRING database
AGT	RAF1	0.9	STRING database
APLNR	ANXA1	0.9	STRING database
RXRA	DLAT	0.9	STRING database
ORM2	PRKCD	0.9	STRING database
IMPDH1	GLB1	0.9	STRING database
AOC1	ORM1	0.9	STRING database
PTGFR	PIK3CA	0.9	STRING database
PTGER1	PIK3CA	0.9	STRING database
SUMO1	RORA	0.9	STRING database
SMAD9	PPP1CA	0.9	STRING database
TUBB	GLB1	0.9	STRING database
PTGFR	UTS2R	0.9	STRING database
MT-CO2	ATP5C1	0.9	STRING database
P2RY12	BDKRB1	0.9	STRING database
NCOA2	FABP6	0.9	STRING database
CD36	HDAC3	0.9	STRING database
BDKRB1	UTS2	0.9	STRING database
ANXA1	PTGER1	0.9	STRING database
ORM1	VCL	0.9	STRING database
ORM2	GLB1	0.9	STRING database
UTS2R	PIK3CA	0.9	STRING database
MT-CO1	UQCR10	0.899	STRING database
RYR2	CACNA1C	0.899	STRING database
SDHD	COX6A2	0.899	STRING database
MT-CO2	UQCR10	0.898	STRING database
TUBA3C	TUBB4A	0.898	STRING database
UQCRB	SDHB	0.898	STRING database
MT-CO3	COX6A2	0.897	STRING database
MTOR	TP53	0.895	STRING database
CACNB4	CACNA1H	0.895	STRING database
COX7B	UQCR10	0.894	STRING database
SDHC	COX5A	0.894	STRING database
PTGER4	IL1B	0.894	STRING database
RYR2	PPP1CA	0.894	STRING database
GRK5	RHO	0.893	STRING database
PRKCB	SLC9A1	0.892	STRING database
FKBP1B	MTOR	0.892	STRING database
COX6C	CYC1	0.892	STRING database
CAMK2A	RYR2	0.89	STRING database
PTGS2	PTGS1	0.889	STRING database
ATP1A2	CACNA1A	0.888	STRING database
SDHB	UQCRC1	0.887	STRING database
CACNA1H	CACNG1	0.887	STRING database
ATP2A2	RYR2	0.887	STRING database
PFN1	VCL	0.887	STRING database
COX4I1	UQCRH	0.887	STRING database
TUBA3C	TUBB1	0.886	STRING database
ADCY5	PDE4A	0.886	STRING database
ADRBK1	RHO	0.886	STRING database
PPP3CA	CACNA1C	0.886	STRING database
UQCRQ	MT-CO3	0.885	STRING database
CACNA2D1	CACNA1H	0.885	STRING database
UQCRFS1	COX7A1	0.885	STRING database
CACNB1	CACNA1A	0.885	STRING database
ATP5A1	COX5A	0.884	STRING database
GLRA3	GLRA2	0.883	STRING database
UQCRQ	COX8A	0.883	STRING database
PTGS2	PTGER1	0.883	STRING database
COX8A	COX6A2	0.883	STRING database
FGF1	EGFR	0.882	STRING database
COX6C	UQCRC2	0.882	STRING database
ACTC1	PFN1	0.882	STRING database
MT-ATP8	MT-CO1	0.881	STRING database
MT-CO2	COX6A2	0.88	STRING database
MT-CO3	UQCR10	0.88	STRING database
CYP19A1	AR	0.879	STRING database
PTGS2	PLA2G1B	0.879	STRING database
TUBA8	TUBB3	0.878	STRING database
OPRM1	GRK5	0.878	STRING database
UQCRB	MT-CO3	0.878	STRING database
ATP5A1	SDHB	0.878	STRING database
SLC25A37	FECH	0.878	STRING database
FOXO1	KLF2	0.878	STRING database
CA2	SLC9A1	0.878	STRING database
KCNMA1	CACNA1C	0.877	STRING database
TOP2A	TOP2B	0.877	STRING database
CACNA1H	CACNB3	0.877	STRING database
ATP5A1	MT-CO2	0.875	STRING database
TUBB	TUBA8	0.875	STRING database
PIK3R1	XBP1	0.875	STRING database
COX7B	COX6A2	0.874	STRING database
MT-ATP8	MT-CO3	0.874	STRING database
AGTR2	GNAQ	0.874	STRING database
UQCRH	COX6A2	0.874	STRING database
MYBPC3	ACTC1	0.874	STRING database
PRKCA	CASP3	0.874	STRING database
PPP3CA	CACNA1D	0.873	STRING database
SDHB	MT-CO2	0.873	STRING database
COX8A	UQCRH	0.873	STRING database
MT-ATP8	MT-CO2	0.872	STRING database
PTGS2	EGFR	0.872	STRING database
FOXO1	AR	0.871	STRING database
PDE4A	ADCY2	0.871	STRING database
GRIN2A	GRIN3B	0.871	STRING database
ALOX5	PLA2G1B	0.87	STRING database
DAG1	FKTN	0.87	STRING database
FLNA	VCL	0.869	STRING database
NCOA1	ESRRA	0.868	STRING database
CACNB1	CACNA1B	0.868	STRING database
TTR	APOA1	0.868	STRING database
TTN	TRIM63	0.867	STRING database
CACNA1H	CACNB2	0.867	STRING database
COX6C	SDHC	0.866	STRING database
GRIN2B	PPP1CC	0.866	STRING database
SRD5A2	SRD5A3	0.865	STRING database
SDHB	ATP5B	0.865	STRING database
OPRM1	TRIM13	0.865	STRING database
SERPINC1	TFPI	0.864	STRING database
SDHC	NDUFB11	0.863	STRING database
PTGS2	PTGER4	0.861	STRING database
TRIM13	OPRD1	0.86	STRING database
TRIM13	OPRL1	0.86	STRING database
TRIM13	OPRK1	0.86	STRING database
AR	HSP90B1	0.859	STRING database
NR1H4	PPARGC1A	0.859	STRING database
HSP90AB1	HSP90B1	0.859	STRING database
GABRD	GABRA6	0.859	STRING database
CASP3	STAT3	0.858	STRING database
FKBP1A	FABP3	0.857	STRING database
COX6C	UQCRC1	0.857	STRING database
CYP19A1	PGR	0.857	STRING database
NR1I3	MED1	0.857	STRING database
UQCR10	COX6B1	0.856	STRING database
HSP90AB1	RPL3	0.856	STRING database
PDE4D	PDE4B	0.856	STRING database
ESR1	STAT3	0.855	STRING database
HSP90B1	XBP1	0.855	STRING database
CYP19A1	ESR2	0.855	STRING database
ACE	SERPINE1	0.854	STRING database
NFATC1	SRF	0.854	STRING database
HSP90AB1	TP53	0.853	STRING database
MT-CYB	COX6A2	0.852	STRING database
TOP2A	TP53	0.852	STRING database
CASP3	PRKCB	0.852	STRING database
SIRT7	TP53	0.851	STRING database
MT-CO1	UQCRC1	0.851	STRING database
YAP1	LEF1	0.851	STRING database
NOS2	IL1B	0.85	STRING database
ILK	VCL	0.85	STRING database
FGF1	TEK	0.85	STRING database
ERN1	PSEN2	0.849	STRING database
NKX2-5	TNNT2	0.849	STRING database
PIK3R1	PGR	0.848	STRING database
ACSL4	LPL	0.847	STRING database
CACNA1D	KCNMA1	0.847	STRING database
MTOR	PRKCB	0.847	STRING database
MYL3	MYLK3	0.847	STRING database
COX6C	NDUFB11	0.847	STRING database
ATP5C1	UQCRH	0.846	STRING database
SERPINC1	PLAT	0.846	STRING database
PIK3R1	RAF1	0.846	STRING database
PPARD	PPARGC1A	0.846	STRING database
GABRG2	GABRG1	0.845	STRING database
GNAQ	KCNJ2	0.845	STRING database
OPRM1	GNAS	0.845	STRING database
UQCRH	COX6B1	0.845	STRING database
GRIN2A	PPP1CC	0.845	STRING database
FKBP1A	RYR2	0.844	STRING database
FOXO1	PPARG	0.844	STRING database
CAMK2A	PPP1CA	0.844	STRING database
BMPR2	TRPC6	0.843	STRING database
MME	ACE	0.843	STRING database
ILK	PIK3CA	0.842	STRING database
AR	CDK9	0.842	STRING database
GRIN2B	PLAT	0.84	STRING database
AR	ERBB2	0.84	STRING database
FLNA	CAMK2D	0.839	STRING database
PTGS1	PLA2G1B	0.839	STRING database
FKBP1A	RICTOR	0.838	STRING database
GABRD	GABRG1	0.838	STRING database
HAMP	TP53	0.838	STRING database
ADCY5	PDE4C	0.838	STRING database
CDK9	TP53	0.837	STRING database
FOXP3	PDCD1	0.837	STRING database
CEL	PNPLA2	0.836	STRING database
GRIN2B	PPP1CA	0.836	STRING database
ESRRG	PPARGC1A	0.836	STRING database
MT-ATP6	PTGS1	0.836	STRING database
CYC1	COX7A1	0.836	STRING database
TFAM	TP53	0.836	STRING database
AR	STAT3	0.836	STRING database
PPP1CC	CAMK2D	0.836	STRING database
PIK3R1	ILK	0.835	STRING database
CACNA1B	CACNA1A	0.835	STRING database
GABRG1	GABRB2	0.835	STRING database
COX7A1	UQCRC1	0.834	STRING database
CYP2C8	CYP2C9	0.833	STRING database
POMC	CYP17A1	0.833	STRING database
ATP1A1	ATP5C1	0.833	STRING database
GRIN2A	PPP1CA	0.832	STRING database
ADCY5	PDE4D	0.832	STRING database
IMMT	UQCRC2	0.832	STRING database
ATP5C1	NDUFB11	0.832	STRING database
FOXP3	CD40LG	0.832	STRING database
CASP3	IL1B	0.831	STRING database
CACNA1B	CACNG1	0.831	STRING database
RET	STAT3	0.831	STRING database
CAMK2A	FLNA	0.83	STRING database
MTOR	ERBB2	0.83	STRING database
GABRB1	GABRB2	0.829	STRING database
CACNA1A	CACNA1C	0.829	STRING database
GABRG2	GABRD	0.829	STRING database
COX7B	UQCRC2	0.828	STRING database
COX4I1	SDHA	0.828	STRING database
PRKCD	ADCY2	0.828	STRING database
PPP1CA	CACNA1D	0.828	STRING database
POMC	CYP11B2	0.828	STRING database
MYBPC3	CSRP3	0.827	STRING database
CAMK2D	FLNC	0.827	STRING database
NCOA2	NR1I3	0.827	STRING database
SDHC	UQCRC1	0.827	STRING database
ATP1A3	ATP1A2	0.826	STRING database
ADCY2	PDE4B	0.825	STRING database
MT-CO2	SDHA	0.825	STRING database
CAMK2A	FLNC	0.825	STRING database
CACNA1I	CACNA1G	0.824	STRING database
GABRE	GABRB1	0.824	STRING database
PTGS2	PTGER3	0.824	STRING database
NDUFB11	UQCRC2	0.824	STRING database
SLC4A4	CA4	0.824	STRING database
GABRE	GABRB2	0.823	STRING database
HSP90AB1	EGFR	0.823	STRING database
PTGS2	ERBB2	0.822	STRING database
CACNB1	CACNA1G	0.822	STRING database
MT-CYB	NDUFB11	0.821	STRING database
GABRE	GABRB3	0.821	STRING database
COX7B	UQCRH	0.821	STRING database
ERBB2	FGF2	0.821	STRING database
UQCR10	COX7A1	0.821	STRING database
EDN1	HAND2	0.821	STRING database
CACNA1I	CACNA1H	0.821	STRING database
CAMK2A	PPP1CC	0.821	STRING database
PRKCA	SLC9A1	0.82	STRING database
ACTA1	PPP1CC	0.82	STRING database
PPP1CA	CACNA1C	0.82	STRING database
GABRA1	CLCN2	0.819	STRING database
SDHD	COX5A	0.819	STRING database
ATP1A1	ATP2A2	0.819	STRING database
PTGS2	PPARG	0.819	STRING database
SRD5A2	SRD5A1	0.818	STRING database
SRD5A2	AR	0.818	STRING database
SHOC2	PTPN11	0.818	STRING database
NR1I3	CYP2B6	0.817	STRING database
ADCY5	PRKCD	0.817	STRING database
PRKCA	ILK	0.817	STRING database
CAMK2D	PPP1CA	0.817	STRING database
ADCY5	PDE4B	0.817	STRING database
PPP1CC	CACNA1D	0.816	STRING database
UQCRB	COX7A1	0.816	STRING database
CACNA1H	CACNA1C	0.816	STRING database
FLNA	FLNC	0.816	STRING database
GABRA1	GABRD	0.816	STRING database
PPP1CC	CACNA1C	0.816	STRING database
TTN	ANKRD1	0.815	STRING database
FGF2	IL1B	0.815	STRING database
GABRD	CLCN2	0.815	STRING database
GRIN1	PVALB	0.815	STRING database
IMMT	OPA1	0.815	STRING database
OPA1	YME1L1	0.814	STRING database
CACNA1B	CACNA1H	0.814	STRING database
CASP3	MAPK1	0.814	STRING database
CACNA1G	CACNA1H	0.814	STRING database
ADCY5	PRKCA	0.814	STRING database
CACNA1A	PRKCB	0.813	STRING database
HIF1A	ESR1	0.813	STRING database
ESRRA	ESRRG	0.813	STRING database
SDHC	MT-CYB	0.813	STRING database
SDHB	MT-CO1	0.813	STRING database
ATP1A1	MAPK1	0.813	STRING database
NR1I2	CYP2B6	0.812	STRING database
CACNA1S	KCNMA1	0.812	STRING database
MTOR	CASP3	0.811	STRING database
CACNA1G	CACNB3	0.811	STRING database
PGR	EGFR	0.811	STRING database
YAP1	PPP1CC	0.811	STRING database
NR3C2	ACE	0.811	STRING database
ATP5A1	MT-CO1	0.81	STRING database
MYH6	ACTA1	0.81	STRING database
KCNJ4	GNAQ	0.81	STRING database
CRYAB	BAG3	0.809	STRING database
FKBP1A	CACNA1S	0.809	STRING database
SOAT1	SOAT2	0.809	STRING database
IMMT	ATP5B	0.808	STRING database
PDK3	ITGB1BP2	0.808	STRING database
ACTN2	CSRP3	0.808	STRING database
PDE4D	ADCY2	0.807	STRING database
AR	CYP17A1	0.807	STRING database
CACNA1H	CACNA1D	0.806	STRING database
NR1I2	SULT2A1	0.806	STRING database
COX4I1	ATP5C1	0.806	STRING database
ATP2A2	SLC8A1	0.806	STRING database
LAMP2	TUBB	0.806	STRING database
GRIN2D	GRIN3B	0.805	STRING database
PRKCA	CACNA1A	0.805	STRING database
RET	FGF2	0.805	STRING database
ANXA5	TP53	0.805	STRING database
ATP2A2	ATP1A2	0.804	STRING database
HSP90B1	ERBB2	0.804	STRING database
SDHB	UQCR10	0.804	STRING database
ESR1	XBP1	0.804	STRING database
PTGS2	ANXA5	0.804	STRING database
ATP1A1	ATP1A2	0.803	STRING database
HSD17B1	CYP17A1	0.803	STRING database
PIK3R1	IL6ST	0.803	STRING database
UQCR10	COX8A	0.803	STRING database
MT-CYB	SDHA	0.803	STRING database
AR	EGFR	0.803	STRING database
ATP1A1	ATP1A3	0.803	STRING database
ATP1A2	PLN	0.802	STRING database
SOAT1	SULT2B1	0.801	STRING database
DICER1	TP53	0.801	STRING database
GRIN2C	GRIN3B	0.801	STRING database
SOAT2	SULT2B1	0.801	STRING database
CEL	SULT2B1	0.801	STRING database
AR	FLNA	0.801	STRING database
PLN	PPP1CA	0.8	STRING database
GLRA3	GRIN3B	0.8	STRING database
SLC4A4	CA2	0.8	STRING database
GABRA1	GABRG1	0.8	STRING database
PRKCA	SMO	0.8	STRING database
PLN	PPP1CC	0.8	STRING database
COX4I1	TFAM	0.8	STRING database
MTOR	MAPK1	0.8	STRING database
ACE	CMA1	0.8	STRING database
GRIN3A	GLRA3	0.8	STRING database
ATP5C1	SDHA	0.8	STRING database
EDNRA	KCNJ2	0.8	STRING database
POMC	NR3C1	0.799	STRING database
CACNA1A	CACNA2D1	0.799	STRING database
COX6C	MT-CYB	0.798	STRING database
PNPLA2	PPARG	0.798	STRING database
TP53	SERPINE1	0.797	STRING database
ATP1A3	ATP2A2	0.797	STRING database
HDAC2	SIRT7	0.797	STRING database
GABRG2	SLC12A5	0.797	STRING database
PAX3	FOXO1	0.797	STRING database
CYP19A1	SHBG	0.796	STRING database
YAP1	YWHAE	0.796	STRING database
EDN1	PTGS2	0.796	STRING database
ATP5A1	SDHC	0.796	STRING database
CYP2C8	NR1I2	0.796	STRING database
MT-ATP8	PTGS1	0.796	STRING database
NR3C2	CYP11B2	0.796	STRING database
ATP2A2	SLN	0.795	STRING database
CACNA1G	CACNB2	0.795	STRING database
GRIN2B	GRIN3B	0.795	STRING database
CACNA1S	CACNA1H	0.795	STRING database
ATP2A2	SLC9A1	0.795	STRING database
PTGS2	PTGER2	0.794	STRING database
CACNA1F	CACNA1H	0.794	STRING database
ATP1A1	SLC9A1	0.794	STRING database
PPARG	IL1B	0.794	STRING database
IL1B	MAPK1	0.794	STRING database
ORM2	APOA1	0.793	STRING database
PGR	TP53	0.793	STRING database
COX8A	EGFR	0.793	STRING database
POMC	HSD3B1	0.792	STRING database
EDN1	ACE	0.792	STRING database
TTN	LMNA	0.792	STRING database
MT-CO1	SDHA	0.792	STRING database
DMD	VCL	0.791	STRING database
GABRG1	GABRA6	0.79	STRING database
MYH6	NKX2-5	0.79	STRING database
TTN	ACTA1	0.79	STRING database
UQCRFS1	NDUFB11	0.79	STRING database
SDHD	ATP5C1	0.789	STRING database
MT-CO2	EGFR	0.789	STRING database
HSP90AB1	MAP3K5	0.789	STRING database
CYP19A1	ERBB2	0.789	STRING database
POMC	SULT2A1	0.788	STRING database
UQCRB	ATP5B	0.788	STRING database
TP53	FGF2	0.787	STRING database
PPARG	EGFR	0.787	STRING database
HSP90AB1	RAF1	0.787	STRING database
ATP5C1	COX6B1	0.786	STRING database
FOXP3	MTOR	0.786	STRING database
CAMK2A	CACNA1C	0.785	STRING database
SDHC	CYC1	0.785	STRING database
FKBP1A	CACNA1C	0.785	STRING database
TEK	FGF4	0.784	STRING database
UQCRB	MT-CO1	0.784	STRING database
AGTR1	PPARG	0.784	STRING database
ANXA1	EGFR	0.783	STRING database
TTN	RBM20	0.782	STRING database
AR	MAPK1	0.782	STRING database
CACNA1A	CACNG1	0.782	STRING database
SLC12A1	SCNN1G	0.781	STRING database
TP53	PPARGC1A	0.781	STRING database
ACTN2	ACTC1	0.781	STRING database
GABRG2	CLCN2	0.78	STRING database
ESR2	NCOA5	0.779	STRING database
TTN	CSRP3	0.779	STRING database
PRKCB	PPP2CB	0.778	STRING database
SDHB	DLAT	0.778	STRING database
GABRB1	GABRG1	0.777	STRING database
CACNA1F	KCNMA1	0.776	STRING database
EGFR	FGF4	0.776	STRING database
COX7A1	UQCRC2	0.776	STRING database
PIK3CG	PRKCB	0.776	STRING database
MYBPC3	LDB3	0.776	STRING database
CACNB1	CACNA1H	0.775	STRING database
TFAM	MT-CO1	0.775	STRING database
CSRP3	TNNT2	0.775	STRING database
ILK	MTOR	0.774	STRING database
FABP6	FABP3	0.774	STRING database
UTS2R	GRIN2D	0.774	STRING database
[truncated: 3,012 more rows]
